# Supplementary material for: Functional Genomics Analysis to Disentangle the Role of Genetic Variants in Major Depression
Source: Genes (Basel). 2022 Jul 15;13(7):1259. doi: 10.3390/genes13071259 (PMC9320424; doi:10.3390/genes13071259)
Supplement: Supplementary file 1 [file genes-13-01259-s001.zip › Perez-Granado-Supplementary_tables_1-7_v2.xlsx]

## Sheet: Info
Supplementary files for the article: Functional genomics analysis to disentangle the role of genetic variants in major depression
Judith Pérez-Granado1, Janet Piñero1,2, Alejandra Medina-Rivera3,4, Laura I. Furlong1,2,4
1 Research Programme on Biomedical Informatics (GRIB), IMIM (Hospital del Mar Medical Research Institute), UPF (Pompeu Fabra University), Dr. Aiguader, Barcelona, Spain
2 MedBioinformatics Solutions SL, Almogàvers 165, 08018 Barcelona, Spain
3 Laboratorio Internacional de Investigación sobre el Genoma Humano, Universidad Nacional Autónoma de México, Campus Juriquilla, Blvd Juriquilla 3001, Santiago de Querétaro 76230, Mexico
4 Corresponding authors
Supplementary tables S1-S7.
Supplementary Tables. Supplementary Table S1. Summary of resources. Supplementary Table S2. Causal GVs for MD. Supplementary Table S3. pGenes functional and disease enrichment analysis. Supplementary Table S4. Fine-mapped MD causal GVs disease enrichment analysis. Supplementary Table S5. Colocalizing GWAS-eQTLs association to disease. Supplementary Table S6. TFBS analysis. Supplementary Table S7.…

## Sheet: Supplementary Table S1
Supplementary Table S1. Summary of resources.
Goal	Resource
GV characterization	VEP and CADD
LD expansion and Fine-mapping	PICS2
Colocalization	CLPP
Identification of TFBS with Chip-Seq data	SNPNexus and ENCODE
eQTL and expression data	GTEx
Creation of controls	vSampler
Get PSSMs	Footprintdb, Jaspar, ENCODE, Hocomoco and Hpdi
Identification of significant TFBS alteration	RSAT
Identification of active regions of the genome	ChromHMM
Regulation of human transcription factors and their targets	hTFtarget
Full list of resources, including tools and databases, used in the analysis pipeline. GV: genetic variant; VEP: Variant Effect Predictor; CADD: Combined Annotation Dependent Depletion; LD: linkage disequilibrium; PICS: Probabilistic Identification of Causal SNPs; CLPP: colocalization posterior probability; TFBS: transcription factor binding site; ENCODE: Encyclopedia of DNA Elements; eQTL: expres…

## Sheet: Supplementary Table S2
Supplementary Table S2. Causal GVs for MD.
GV	Ref	Alt	AF	Consequence type	CADD score	pGene	Lead GV	PICS probability GWAS
rs913930	G	A	0.8231	UTR variant	3.692	TLR4	rs913930	0.9999
rs913930	G	A	0.8231	intron variant	3.692	AL160272.2	rs913930	0.9999
rs913930	G	A	0.8231	NMD transcript variant	3.692	AL160272.2	rs913930	0.9999
rs200949	A	G	0.1458	intergenic variant	9.843	HIST1H1B	rs200949	0.9972
rs200949	A	G	0.1458	intergenic variant	9.843	HIST1H2BN	rs200949	0.9972
rs200949	A	G	0.1458	intergenic variant	9.843	HIST1H2BPS2	rs200949	0.9972
rs200949	A	G	0.1458	intergenic variant	9.843	HIST1H2AL	rs200949	0.9972
rs200949	A	G	0.1458	intergenic variant	9.843	HIST1H3I	rs200949	0.9972
rs200949	A	G	0.1458	regulatory region variant	9.843		rs200949	0.9972
rs34937911	T	C	0.0845	intergenic variant	0.086	BEND4	rs34937911	0.9939
rs75581564	G	A	0.0333	intron variant	7.181	PIPOX	rs75581564	0.9782
rs75581564	G	A	0.0333	regulatory region variant	7.181		rs75581564	0.9782
rs75581564	G	A	0.0333	non coding transcript variant	7.181	PIPOX	rs75581564	0.9782
rs10149470	A	G	0.5002	intergenic variant	1.275	BAG5	rs10149470	0.9657
rs10149470	A	G	0.5002	intergenic variant	1.275	RNU7-160P	rs10149470	0.9657
rs10149470	A	G	0.5002	intergenic variant	1.275	AL139300.2	rs10149470	0.9657
rs10149470	A	G	0.5002	regulatory region variant	1.275		rs10149470	0.9657
rs4772087	C	T	0.2546	intron variant	0.697	STK24	rs4772087	0.9656
rs198457	C	T	0.0633	intron variant	1.404	DAGLA	rs198457	0.9627
rs198457	C	T	0.0633	NMD transcript variant	1.404	DAGLA	rs198457	0.9627
rs1568452	C	T	0.2985	intergenic variant	0.619		rs1568452	0.9602
rs78337797	T	G	0.0439	intron variant	1.027	SOX5	rs78337797	0.9441
rs78337797	T	G	0.0439	NMD transcript variant	1.027	SOX5	rs78337797	0.9441
rs67436663	G	C	0.26	intergenic variant	2.139		rs67436663	0.9308
rs9592461	A	G	0.401	intron variant	0.3	PCDH9	rs9592461	0.893
rs9592461	A	G	0.401	NMD transcript variant	0.3	PCDH9	rs9592461	0.893
rs725616	T	C		intron variant	0.027	SAMD5	rs725616	0.8832
rs12967143	G	C	0.5132	intron variant	0.133	TCF4	rs12967143	0.8824
rs12967143	G	C	0.5132	non coding transcript variant	0.133	TCF4	rs12967143	0.8824
rs12967143	G	C	0.5132	NMD transcript variant	0.133	TCF4	rs12967143	0.8824
rs1982277	T	C	0.1252	intergenic variant	2.211		rs1982277	0.8762
rs30266	G	A	0.1865	intron variant	1.657	AC099520.1	rs30266	0.8748
rs30266	G	A	0.1865	non coding transcript variant	1.657	AC099520.1	rs30266	0.8748
rs1354115	C	A		intron variant	3.167	CARM1P1	rs1354115	0.832
rs1354115	C	A		non coding transcript variant	3.167	CARM1P1	rs1354115	0.832
rs2876520	C	G	0.4667	intron variant	2.01	AL355337.1	rs2876520	0.8282
rs2876520	C	G	0.4667	non coding transcript variant	2.01	AL355337.1	rs2876520	0.8282
rs7193263	G	A	0.5325	intron variant	0.314	RBFOX1	rs7193263	0.8184
rs7193263	G	A	0.5325	non coding transcript variant	0.314	RBFOX1	rs7193263	0.8184
rs3793577	A	G	0.4964	intron variant	19.64	ELAVL2	rs3793577	0.8117
rs3793577	A	G	0.4964	intergenic variant	19.64	ELAVL2	rs3793577	0.8117
rs3793577	A	G	0.4964	regulatory region variant	19.64		rs3793577	0.8117
rs7200826	C	T	0.1464	intron variant	0.223	SHISA9	rs7200826	0.7819
rs12052908	A	T	0.5164	intron variant	0.808	AC096570.1	rs12052908	0.7819
rs12052908	A	T	0.5164	regulatory region variant	0.808		rs12052908	0.7819
rs12052908	A	T	0.5164	non coding transcript variant	0.808	AC096570.1	rs12052908	0.7819
rs8037355	C	T	0.4842	intergenic variant	0.279		rs8037355	0.7536
rs17641524	C	T	0.1216	splicing variant	6.723	DENND1B	rs17641524	0.7462
rs17641524	C	T	0.1216	intron variant	6.723	DENND1B	rs17641524	0.7462
rs17641524	C	T	0.1216	intergenic variant	6.723	DENND1B	rs17641524	0.7462
rs17641524	C	T	0.1216	intergenic variant	6.723	AL365258.2	rs17641524	0.7462
rs17641524	C	T	0.1216	non coding transcript variant	6.723	DENND1B	rs17641524	0.7462
rs17641524	C	T	0.1216	synonymous variant	6.723	DENND1B	rs17641524	0.7462
rs17641524	C	T	0.1216	NMD transcript variant	6.723	DENND1B	rs17641524	0.7462
rs12624433	G	A	0.2077	intron variant	4.267	SLC12A5	rs12624433	0.7355
rs12624433	G	A	0.2077	intergenic variant	4.267	SLC12A5	rs12624433	0.7355
rs263645	A	T	0.5461	intergenic variant	3.879	AL162725.2	rs263645	0.6968
rs263645	A	T	0.5461	intron variant	3.879	AL162725.2	rs263645	0.6968
rs263645	A	T	0.5461	non coding transcript variant	3.879	AL162725.2	rs263645	0.6968
rs301799	C	T	0.6248	intron variant	0.057	RERE	rs301799	0.6946
rs301799	C	T	0.6248	intron variant	0.057	RERE-AS1	rs301799	0.6946
rs301799	C	T	0.6248	intergenic variant	0.057	RERE	rs301799	0.6946
rs301799	C	T	0.6248	non coding transcript variant	0.057	RERE-AS1	rs301799	0.6946
rs7030813	C	T	0.3642	intron variant	1.039	PAX5	rs7030813	0.6672
rs7030813	C	T	0.3642	intergenic variant	1.039	AL161781.2	rs7030813	0.6672
rs7030813	C	T	0.3642	intergenic variant	1.039	PAX5	rs7030813	0.6672
rs7030813	C	T	0.3642	NMD transcript variant	1.039	PAX5	rs7030813	0.6672
rs12967855	A	G	0.4694	intron variant	0.607	CELF4	rs12967855	0.6618
rs12967855	A	G	0.4694	non coding transcript variant	0.607	CELF4	rs12967855	0.6618
rs13084037	G	A	0.8954	intergenic variant	5.482	KLHDC8B	rs13084037	0.6522
rs13084037	G	A	0.8954	intergenic variant	5.482	C3orf84	rs13084037	0.6522
rs13084037	G	A	0.8954	regulatory region variant	5.482		rs13084037	0.6522
rs12966052	G	C	0.1072	intergenic variant	19.39		rs12966052	0.5819
rs6783233	C	T	0.1911	intron variant	0.05	AC092691.3	rs6783233	0.5617
rs6783233	C	T	0.1911	intron variant	0.05	AC092691.1	rs6783233	0.5617
rs6783233	C	T	0.1911	regulatory region variant	0.05		rs6783233	0.5617
rs6783233	C	T	0.1911	non coding transcript variant	0.05	AC092691.3	rs6783233	0.5617
rs6783233	C	T	0.1911	non coding transcript variant	0.05	AC092691.1	rs6783233	0.5617
rs7198928	T	C	0.4137	intron variant	3.437	RBFOX1	rs7198928	0.5406
rs7198928	T	C	0.4137	intergenic variant	3.437	AC005774.2	rs7198928	0.5406
rs7198928	T	C	0.4137	non coding transcript variant	3.437	RBFOX1	rs7198928	0.5406
rs56314503	T	G	0.1779	intergenic variant	4.497		rs56314503	0.5294
rs3823624	T	C	0.1701	intron variant	2.408	MAD1L1	rs3823624	0.5204
rs3823624	T	C	0.1701	intron variant	2.408	AC069288.1	rs3823624	0.5204
rs3823624	T	C	0.1701	regulatory region variant	2.408		rs3823624	0.5204
rs3823624	T	C	0.1701	non coding transcript variant	2.408	MAD1L1	rs3823624	0.5204
rs3823624	T	C	0.1701	NMD transcript variant	2.408	AC069288.1	rs3823624	0.5204
rs2247523	C	G	0.4946	intron variant	0.035	PCLO	rs2247523	0.5135
rs2247523	C	G	0.4946	intergenic variant	0.035	PCLO	rs2247523	0.5135
rs2247523	C	G	0.4946	non coding transcript variant	0.035	PCLO	rs2247523	0.5135
rs997934	T	C	0.6552	intergenic variant	1.012		rs997934	0.5104
rs7837935	T	G		intron variant	9.264	CYP7B1	rs7837935	0.4969
rs2670139	T	C	0.4131	intron variant	14.05	DENND1A	rs2670139	0.495
rs2670139	T	C	0.4131	regulatory region variant	14.05		rs2670139	0.495
rs1021362	G	A		intron variant	16.25	SORCS3	rs1021363	0.4747
rs1021363	A	G	0.769	intron variant	12.17	SORCS3	rs1021363	0.4747
rs1343605	A	C	0.6735	intergenic variant	3.741		rs1343605	0.4742
rs33431	C	T	0.4073	intron variant	17.04	ZNF536	rs33431	0.4641
rs7685686	A	G	0.4663	intron variant	3.047	HTT	rs7685686	0.4446
rs7685686	A	G	0.4663	non coding transcript variant	3.047	HTT	rs7685686	0.4446
rs1466887	C	T		intron variant	0.144	AL353604.1	rs1466887	0.4349
rs1466887	C	T		regulatory region variant	0.144		rs1466887	0.4349
rs1466887	C	T		non coding transcript variant	0.144	AL353604.1	rs1466887	0.4349
rs1045430	T	G	0.3415	UTR variant	13.43	AREL1	rs1045430	0.4126
rs1045430	T	G	0.3415	intergenic variant	13.43	AC007956.2	rs1045430	0.4126
rs1045430	T	G	0.3415	intergenic variant	13.43	AREL1	rs1045430	0.4126
rs1045430	T	G	0.3415	intron variant	13.43	AREL1	rs1045430	0.4126
rs1045430	T	G	0.3415	NMD transcript variant	13.43	AREL1	rs1045430	0.4126
rs1045430	T	G	0.3415	non coding transcript variant	13.43	AREL1	rs1045430	0.4126
rs4598994	A	G	0.1076	intergenic variant	5.988		rs12966052	0.4009
rs1002656	C	T	0.4577	intergenic variant	0.763		rs1002656	0.3998
rs10061069	G	C	0.2624	intron variant	0.398	FAM172A	rs10061069	0.3748
rs10061069	G	C	0.2624	UTR variant	0.398	POU5F2	rs10061069	0.3748
rs10061069	G	C	0.2624	NMD transcript variant	0.398	FAM172A	rs10061069	0.3748
rs7807677	C	T	0.5184	intron variant	0.232	CTTNBP2	rs7807677	0.3746
rs7807677	C	T	0.5184	regulatory region variant	0.232		rs7807677	0.3746
rs7807677	C	T	0.5184	NMD transcript variant	0.232	CTTNBP2	rs7807677	0.3746
rs2509805	T	C		intergenic variant	2.873		rs2509805	0.3712
rs61990288	G	A	0.2478	intergenic variant	1.952	LRFN5	rs61990288	0.359
rs61990288	G	A	0.2478	intergenic variant	1.952	AL121821.2	rs61990288	0.359
rs61990288	G	A	0.2478	regulatory region variant	1.952		rs61990288	0.359
rs12923444	A	C	0.2648	intron variant	6.346	METTL9	rs12923444	0.3432
rs12923444	A	C	0.2648	intergenic variant	6.346	METTL9	rs12923444	0.3432
rs12923444	A	C	0.2648	intergenic variant	6.346	AC005632.3	rs12923444	0.3432
rs62091461	C	T	0.2242	intron variant	0.212	RAB27B	rs62091461	0.3377
rs7308004	C	A	0.1773	intergenic variant	0.115		rs56314503	0.3344
rs56887639	A	G	0.26	intergenic variant	0.382		rs56887639	0.3263
rs11579246	A	G	0.1302	intron variant	5.088	ELAVL4	rs11579246	0.3224
rs11579246	A	G	0.1302	NMD transcript variant	5.088	ELAVL4	rs11579246	0.3224
rs11579246	A	G	0.1302	non coding transcript variant	5.088	ELAVL4	rs11579246	0.3224
rs35553410	T	C	0.1873	intergenic variant	1.286		rs35553410	0.3108
rs169235	A	G	0.2598	intron variant	2.159	CACNA1E	rs169235	0.306
rs169235	A	G	0.2598	intergenic variant	2.159	RNA5SP70	rs169235	0.306
rs169235	A	G	0.2598	intergenic variant	2.159	CACNA1E	rs169235	0.306
rs143186028	G	T	0.0797	intergenic variant	0.075	EMILIN3	rs143186028	0.2979
rs1002655	C	G	0.4581	intergenic variant	0.375		rs1002656	0.2941
rs11135349	A	C	0.6524	intron variant	1.021	AC109466.1	rs11135349	0.2938
rs11135349	A	C	0.6524	non coding transcript variant	1.021	AC109466.1	rs11135349	0.2938
rs1226412	C	T	0.6931	non coding transcript variant	5.725	LINC01876	rs1226412	0.292
rs1226412	C	T	0.6931	regulatory region variant	5.725		rs1226412	0.292
rs34653192	G	C	0.1454	intergenic variant	0.964		rs34653192	0.2889
9:37000690:C:T	C	T	0.3636	intron variant	3.048	PAX5	rs7030813	0.282
9:37000690:C:T	C	T	0.3636	intergenic variant	3.048	AL161781.2	rs7030813	0.282
9:37000690:C:T	C	T	0.3636	intergenic variant	3.048	PAX5	rs7030813	0.282
9:37000690:C:T	C	T	0.3636	NMD transcript variant	3.048	PAX5	rs7030813	0.282
rs7241572	G	A	0.1388	intergenic variant	1.91	AC021594.2	rs7241572	0.276
rs58621819	A	T	0.1466	intron variant	4.086	LTBP3	rs58621819	0.2742
rs58621819	A	T	0.1466	intergenic variant	4.086	LTBP3	rs58621819	0.2742
rs58621819	A	T	0.1466	regulatory region variant	4.086		rs58621819	0.2742
rs58621819	A	T	0.1466	NMD transcript variant	4.086	LTBP3	rs58621819	0.2742
rs7227069	G	A	0.2332	intron variant	1.296	DCC	rs7227069	0.2706
rs7227069	G	A	0.2332	NMD transcript variant	1.296	DCC	rs7227069	0.2706
rs1956373	G	T	0.6444	intron variant	0.736	RTN1	rs1956373	0.2703
rs1956373	G	T	0.6444	non coding transcript variant	0.736	RTN1	rs1956373	0.2703
rs58104186	G	A	0.5148	intergenic variant	0.609		rs58104186	0.2702
rs2568958	G	A		intergenic variant	1.734	RPL31P12	rs2568958	0.2676
rs2568958	G	A		intron variant	1.734	AL513166.1	rs2568958	0.2676
rs2568958	G	A		non coding transcript variant	1.734	AL513166.1	rs2568958	0.2676
rs7932640	T	C	0.622	intron variant	0.304	GRM5	rs7932640	0.2613
rs1933802	C	G	0.5174	intron variant	7.784	LIN28B-AS1	rs1933802	0.2598
rs1933802	C	G	0.5174	non coding transcript variant	7.784	LIN28B-AS1	rs1933802	0.2598
rs61902811	G	A	0.1809	intergenic variant	0.112		rs61902811	0.2596
rs61902812	C	A	0.1809	intergenic variant	0.114		rs61902811	0.2596
rs62188629	G	A	0.1831	intron variant	2.098	AC007879.1	rs62188629	0.2587
rs62188629	G	A	0.1831	intron variant	2.098	MYOSLID	rs62188629	0.2587
rs62188629	G	A	0.1831	non coding transcript variant	2.098	AC007879.1	rs62188629	0.2587
rs62188629	G	A	0.1831	non coding transcript variant	2.098	MYOSLID	rs62188629	0.2587
rs5995992	T	C	0.251	intergenic variant	7.497	EP300	rs5995992	0.2484
rs5995992	T	C	0.251	intergenic variant	7.497	MIR1281	rs5995992	0.2484
rs5995992	T	C	0.251	regulatory region variant	7.497		rs5995992	0.2484
rs7117514	A	G	0.2969	intergenic variant	0.914	SHANK2	rs7117514	0.2389
rs7117514	A	G	0.2969	intron variant	0.914	SHANK2	rs7117514	0.2389
rs7117514	A	G	0.2969	non coding transcript variant	0.914	SHANK2	rs7117514	0.2389
rs3091404	C	T	0.2644	intron variant	0.014	IGSF6	rs12923444	0.2312
rs3091404	C	T	0.2644	intron variant	0.014	METTL9	rs12923444	0.2312
rs3091404	C	T	0.2644	intergenic variant	0.014	RNU6-196P	rs12923444	0.2312
rs3091404	C	T	0.2644	intergenic variant	0.014	RNU6-1005P	rs12923444	0.2312
rs3091404	C	T	0.2644	intergenic variant	0.014	METTL9	rs12923444	0.2312
rs3091404	C	T	0.2644	non coding transcript variant	0.014	IGSF6	rs12923444	0.2312
rs3785083	C	T	0.2648	intron variant	0.256	IGSF6	rs12923444	0.2312
rs3785083	C	T	0.2648	intron variant	0.256	METTL9	rs12923444	0.2312
rs3785083	C	T	0.2648	intergenic variant	0.256	METTL9	rs12923444	0.2312
rs3785083	C	T	0.2648	non coding transcript variant	0.256	IGSF6	rs12923444	0.2312
rs2509808	C	G		intergenic variant	0.148		rs2509805	0.2258
rs33430	A	G	0.4129	intron variant	20.3	ZNF536	rs33431	0.2204
rs33430	A	G	0.4129	intergenic variant	20.3	ZNF536	rs33431	0.2204
rs2102341	T	C	0.4593	intergenic variant	4.217		rs1002656	0.2156
rs9545360	C	A	0.0689	intergenic variant	7.15		rs9545360	0.2149
rs45510091	A	G	0.0152	intron variant	5.252	KIAA1109	rs45510091	0.2122
rs45510500	C	T	0.0152	nonsynonymous variant	28.9	KIAA1109	rs45510091	0.2122
rs45510500	C	T	0.0152	regulatory region variant	28.9		rs45510091	0.2122
rs77087420	A	G	0.0152	intron variant	9.671	KIAA1109	rs45510091	0.2122
rs77087420	A	G	0.0152	non coding transcript variant	9.671	KIAA1109	rs45510091	0.2122
rs10789214	C	T	0.8195	intron variant	0.439	SGIP1	rs10789214	0.2112
rs10789214	C	T	0.8195	intergenic variant	0.439	SGIP1	rs10789214	0.2112
rs10789214	C	T	0.8195	intergenic variant	0.439	AL139147.1	rs10789214	0.2112
rs10789214	C	T	0.8195	non coding transcript variant	0.439	SGIP1	rs10789214	0.2112
rs1226413	C	G		intron variant	6.418	LINC01876	rs1226412	0.2111
rs1226413	C	G		regulatory region variant	6.418		rs1226412	0.2111
rs1226413	C	G		non coding transcript variant	6.418	LINC01876	rs1226412	0.2111
rs2302832	T	C	0.3425	intron variant	8.603	AREL1	rs1045430	0.2044
rs2302832	T	C	0.3425	intergenic variant	8.603	AREL1	rs1045430	0.2044
rs2302832	T	C	0.3425	regulatory region variant	8.603		rs1045430	0.2044
rs2302832	T	C	0.3425	non coding transcript variant	8.603	AREL1	rs1045430	0.2044
rs2302832	T	C	0.3425	NMD transcript variant	8.603	AREL1	rs1045430	0.2044
rs2806949	A	G	0.6743	intergenic variant	5.594		rs1343605	0.2007
rs4730387	T	A		intergenic variant	1.273		rs58104186	0.2005
rs12994955	C	A	0.6929	intergenic variant	1.796		rs1226412	0.1962
rs1421715	G	A		intron variant	1.077	AC109466.1	rs11135349	0.1951
rs1421715	G	A		non coding transcript variant	1.077	AC109466.1	rs11135349	0.1951
rs11865150	A	T	0.2598	intergenic variant	0.277		rs56887639	0.1909
rs1956351	A	T	0.6448	intron variant	7.83	RTN1	rs1956373	0.1897
rs1956351	A	T	0.6448	non coding transcript variant	7.83	RTN1	rs1956373	0.1897
rs33432	T	C	0.4097	intron variant	19.14	ZNF536	rs33431	0.1883
rs10119773	A	G	0.4964	intron variant	2.645	ELAVL2	rs3793577	0.1878
rs10119773	A	G	0.4964	intergenic variant	2.645	ELAVL2	rs3793577	0.1878
rs10119773	A	G	0.4964	regulatory region variant	2.645		rs3793577	0.1878
rs2806950	G	A	0.6711	intergenic variant	0.039		rs1343605	0.1849
rs1226411	T	A		intergenic variant	2.854		rs1226412	0.1843
rs6878588	T	C	0.6526	intron variant	2.09	AC109466.1	rs11135349	0.1777
rs6878588	T	C	0.6526	non coding transcript variant	2.09	AC109466.1	rs11135349	0.1777
rs947791	G	A	0.147	intron variant	0.497	SCYL1	rs58621819	0.1755
rs947791	G	A	0.147	intergenic variant	0.497	LTBP3	rs58621819	0.1755
rs947791	G	A	0.147	non coding transcript variant	0.497	SCYL1	rs58621819	0.1755
rs947791	G	A	0.147	intergenic variant	0.497	SCYL1	rs58621819	0.1755
rs947791	G	A	0.147	NMD transcript variant	0.497	SCYL1	rs58621819	0.1755
rs11227217	C	T	0.1462	intergenic variant	4.819	SCYL1	rs58621819	0.1754
rs11227217	C	T	0.1462	intron variant	4.819	LTBP3	rs58621819	0.1754
rs11227217	C	T	0.1462	intergenic variant	4.819	LTBP3	rs58621819	0.1754
rs11227217	C	T	0.1462	regulatory region variant	4.819		rs58621819	0.1754
rs11227217	C	T	0.1462	NMD transcript variant	4.819	LTBP3	rs58621819	0.1754
rs11227217	C	T	0.1462	non coding transcript variant	4.819	LTBP3	rs58621819	0.1754
rs10830199	A	G	0.6214	intron variant	0.296	GRM5	rs7932640	0.167
rs11754600	C	T		intergenic variant	13.92	LIN28B-AS1	rs1933802	0.167
rs11754600	C	T		intron variant	13.92	LIN28B	rs1933802	0.167
rs11754600	C	T		intron variant	13.92	LIN28B-AS1	rs1933802	0.167
rs11754600	C	T		intergenic variant	13.92	LIN28B	rs1933802	0.167
rs11754600	C	T		non coding transcript variant	13.92	LIN28B-AS1	rs1933802	0.167
rs11754600	C	T		regulatory region variant	13.92		rs1933802	0.167
rs1475120	G	A	0.5182	intergenic variant	0.714	LIN28B-AS1	rs1933802	0.167
rs1475120	G	A	0.5182	intron variant	0.714	LIN28B	rs1933802	0.167
rs1475120	G	A	0.5182	regulatory region variant	0.714		rs1933802	0.167
rs7403810	T	G		intergenic variant	1.586		rs56887639	0.1661
rs11664298	G	A	0.1396	intergenic variant	5.071	AC021594.2	rs7241572	0.1642
rs6873557	A	G	0.6528	intron variant	2.627	AC109466.1	rs11135349	0.1642
rs6873557	A	G	0.6528	non coding transcript variant	2.627	AC109466.1	rs11135349	0.1642
rs7592120	T	C	0.1835	intron variant	1.154	AC007879.1	rs62188629	0.1634
rs7592120	T	C	0.1835	intron variant	1.154	MYOSLID	rs62188629	0.1634
rs7592120	T	C	0.1835	non coding transcript variant	1.154	AC007879.1	rs62188629	0.1634
rs7592120	T	C	0.1835	non coding transcript variant	1.154	MYOSLID	rs62188629	0.1634
rs2369818	C	T	0.265	intron variant	0.403	METTL9	rs12923444	0.1628
rs2369818	C	T	0.265	intergenic variant	0.403	METTL9	rs12923444	0.1628
rs2369818	C	T	0.265	regulatory region variant	0.403		rs12923444	0.1628
rs2369818	C	T	0.265	NMD transcript variant	0.403	METTL9	rs12923444	0.1628
rs9531037	C	T	0.0691	intergenic variant	1.499		rs9545360	0.1617
rs1890946	T	C	0.5639	intron variant	6.999	NRDC	rs1890946	0.1558
rs1890946	T	C	0.5639	regulatory region variant	6.999		rs1890946	0.1558
rs1890946	T	C	0.5639	non coding transcript variant	6.999	NRDC	rs1890946	0.1558
rs7929619	A	G		intron variant	0.462	GRM5	rs7932640	0.1557
rs1460943	C	T	0.6755	intron variant	0.181	AL513166.1	rs2568958	0.1545
rs2815752	G	A	0.6755	intron variant	1.202	AL513166.1	rs2568958	0.1545
rs1460943	C	T	0.6755	non coding transcript variant	0.181	AL513166.1	rs2568958	0.1545
rs2815752	G	A	0.6755	non coding transcript variant	1.202	AL513166.1	rs2568958	0.1545
rs71367545	G	A	0.1394	non coding transcript variant	0.19	AC021594.2	rs7241572	0.1542
rs3099439	C	T	0.4099	intron variant	2.275	TMEM161B	rs3099439	0.1532
rs3099439	C	T	0.4099	regulatory region variant	2.275		rs3099439	0.1532
rs3099439	C	T	0.4099	non coding transcript variant	2.275	TMEM161B	rs3099439	0.1532
rs3099439	C	T	0.4099	NMD transcript variant	2.275	TMEM161B	rs3099439	0.1532
rs10835717	A	G	0.4059	intron variant	4.726	DCDC1	rs1448938	0.1496
rs10835717	A	G	0.4059	intergenic variant	4.726	DCDC1	rs1448938	0.1496
rs10835717	A	G	0.4059	regulatory region variant	4.726		rs1448938	0.1496
rs1448938	A	G	0.4059	intron variant	7.495	DCDC1	rs1448938	0.1496
rs10835717	A	G	0.4059	NMD transcript variant	4.726	DCDC1	rs1448938	0.1496
rs10835717	A	G	0.4059	non coding transcript variant	4.726	DCDC1	rs1448938	0.1496
rs1448938	A	G	0.4059	NMD transcript variant	7.495	DCDC1	rs1448938	0.1496
rs1448938	A	G	0.4059	non coding transcript variant	7.495	DCDC1	rs1448938	0.1496
rs10913112	C	T	0.2802	intergenic variant	1.038	COP1	rs10913112	0.1483
rs1952043	A	G		intron variant	7.004	RTN1	rs1956373	0.1457
rs6682968	C	T	0.1234	intron variant	0.701	DENND1B	rs17641524	0.1457
rs6682968	C	T	0.1234	intergenic variant	0.701	DENND1B	rs17641524	0.1457
rs1952043	A	G		non coding transcript variant	7.004	RTN1	rs1956373	0.1457
rs6682968	C	T	0.1234	NMD transcript variant	0.701	DENND1B	rs17641524	0.1457
rs6682968	C	T	0.1234	non coding transcript variant	0.701	DENND1B	rs17641524	0.1457
rs314281	T	C	0.5184	intergenic variant	11.96	LIN28B	rs1933802	0.1445
rs314281	T	C	0.5184	intron variant	11.96	LIN28B	rs1933802	0.1445
rs9545358	T	C	0.0693	intergenic variant	0.037		rs9545360	0.1436
rs9531035	T	A	0.0689	intergenic variant	17.6		rs9545360	0.1435
rs11561993	C	T	0.5142	intergenic variant	2.481		rs58104186	0.1428
rs7796203	G	A	0.521	intron variant	1.014	CTTNBP2	rs7807677	0.1404
rs7796203	G	A	0.521	regulatory region variant	1.014		rs7807677	0.1404
rs7796203	G	A	0.521	NMD transcript variant	1.014	CTTNBP2	rs7807677	0.1404
rs1783541	C	T	0.146	intron variant	7.551	SCYL1	rs58621819	0.1395
rs1783541	C	T	0.146	intergenic variant	7.551	SCYL1	rs58621819	0.1395
rs2568952	C	G	0.6757	intron variant	0.882	AL513166.1	rs2568958	0.1362
rs2568952	C	G	0.6757	regulatory region variant	0.882		rs2568958	0.1362
rs2568952	C	G	0.6757	non coding transcript variant	0.882	AL513166.1	rs2568958	0.1362
rs7586277	G	A	0.1847	intron variant	0.552	AC007879.1	rs62188629	0.1347
rs7586277	G	A	0.1847	intron variant	0.552	MYOSLID	rs62188629	0.1347
rs7586277	G	A	0.1847	non coding transcript variant	0.552	AC007879.1	rs62188629	0.1347
rs7586277	G	A	0.1847	non coding transcript variant	0.552	MYOSLID	rs62188629	0.1347
rs60157091	C	T	0.4649	intergenic variant	0.028		rs60157091	0.1346
rs10221371	C	A	0.233	intron variant	1.177	DCC	rs7227069	0.133
rs10221371	C	A	0.233	NMD transcript variant	1.177	DCC	rs7227069	0.133
rs113188507	G	A	0.2372	intergenic variant	0.774		rs113188507	0.1328
rs35895632	C	G		intron variant	1.141	CTTNBP2	rs7807677	0.1326
rs35895632	C	G		NMD transcript variant	1.141	CTTNBP2	rs7807677	0.1326
rs1952042	C	T	0.644	intron variant	6.98	RTN1	rs1956373	0.132
rs1952042	C	T	0.644	regulatory region variant	6.98		rs1956373	0.132
rs1952042	C	T	0.644	non coding transcript variant	6.98	RTN1	rs1956373	0.132
rs16887442	T	C	0.3964	intergenic variant	8.685		rs16887442	0.1312
rs4556040	C	T	0.3964	intergenic variant	2.618		rs16887442	0.1312
rs62460794	G	A	0.3964	intergenic variant	0.638		rs16887442	0.1312
rs4690011	A	G	0.4681	intron variant	1.084	HTT	rs7685686	0.1288
rs4690011	A	G	0.4681	intergenic variant	1.084	HTT	rs7685686	0.1288
rs4690011	A	G	0.4681	non coding transcript variant	1.084	HTT	rs7685686	0.1288
rs12959833	C	T	0.2218	intergenic variant	1.71	RAB27B	rs62091461	0.1275
rs12959833	C	T	0.2218	intron variant	1.71	RAB27B	rs62091461	0.1275
rs1557341	A	C	0.4659	intron variant	1.933	CELF4	rs12967855	0.1263
rs17781288	C	G	0.2498	intergenic variant	0.441	LRFN5	rs61990288	0.1263
rs17781288	C	G	0.2498	intron variant	0.441	AL121821.2	rs61990288	0.1263
rs17781288	C	G	0.2498	regulatory region variant	0.441		rs61990288	0.1263
rs1557341	A	C	0.4659	non coding transcript variant	1.933	CELF4	rs12967855	0.1263
rs17781288	C	G	0.2498	non coding transcript variant	0.441	AL121821.2	rs61990288	0.1263
rs13184801	A	G	0.2612	intron variant	2.111	FAM172A	rs10061069	0.1262
rs13184801	A	G	0.2612	NMD transcript variant	2.111	FAM172A	rs10061069	0.1262
rs12154872	A	G	0.5146	intron variant	7.335	CTTNBP2	rs7807677	0.1253
rs12154872	A	G	0.5146	intergenic variant	7.335	CTTNBP2	rs7807677	0.1253
rs12154872	A	G	0.5146	regulatory region variant	7.335		rs7807677	0.1253
rs12154872	A	G	0.5146	NMD transcript variant	7.335	CTTNBP2	rs7807677	0.1253
rs4753209	T	A	0.6224	intron variant	0.791	GRM5	rs7932640	0.1249
1:8443319:C:A	C	A		intron variant	0.054	RERE	rs301799	0.1241
rs74586099	C	T	0.0803	intron variant	1.666	EMILIN3	rs143186028	0.1239
rs74586099	C	T	0.0803	intergenic variant	1.666	LPIN3	rs143186028	0.1239
rs3101336	T	C	0.6751	intergenic variant	7.346	NEGR1	rs2568958	0.1225
rs3101336	T	C	0.6751	intron variant	7.346	AL513166.1	rs2568958	0.1225
rs3101336	T	C	0.6751	regulatory region variant	7.346		rs2568958	0.1225
rs3101337	C	T	0.6751	intergenic variant	7.89	NEGR1	rs2568958	0.1225
rs3101337	C	T	0.6751	intron variant	7.89	AL513166.1	rs2568958	0.1225
rs3101337	C	T	0.6751	regulatory region variant	7.89		rs2568958	0.1225
rs3101336	T	C	0.6751	non coding transcript variant	7.346	AL513166.1	rs2568958	0.1225
rs3101337	C	T	0.6751	non coding transcript variant	7.89	AL513166.1	rs2568958	0.1225
rs13165221	C	T	0.2606	intron variant	1.051	FAM172A	rs10061069	0.1218
rs11957630	A	G		intron variant	1.864	AC109466.1	rs11135349	0.1218
rs13165221	C	T	0.2606	NMD transcript variant	1.051	FAM172A	rs10061069	0.1218
rs11957630	A	G		non coding transcript variant	1.864	AC109466.1	rs11135349	0.1218
rs61990286	C	T	0.2496	intron variant	0.078	AL121821.2	rs61990288	0.1196
rs61990286	C	T	0.2496	non coding transcript variant	0.078	AL121821.2	rs61990288	0.1196
rs72710803	A	C	0.1118	intron variant	3.452	AL136114.1	rs72710803	0.1155
rs72710803	A	C	0.1118	non coding transcript variant	3.452	AL136114.1	rs72710803	0.1155
rs1022079	C	A	0.1831	intergenic variant	1.249		rs35553410	0.1149
rs41466449	T	C	0.1763	intergenic variant	4.259		rs56314503	0.1146
rs7202384	C	G		intergenic variant	1.068		rs56887639	0.1137
rs7758630	T	A	0.2326	intergenic variant	2.031		rs7758630	0.1129
rs8025231	A	C	0.5144	intergenic variant	6.184		rs8037355	0.111
rs17157433	T	G	0.3962	intergenic variant	3.117		rs16887442	0.1106
rs7809993	C	G	0.5156	intergenic variant	7.681	CTTNBP2	rs7807677	0.1096
rs7809993	C	G	0.5156	intron variant	7.681	CTTNBP2	rs7807677	0.1096
rs7809993	C	G	0.5156	regulatory region variant	7.681		rs7807677	0.1096
rs7413471	T	C		intron variant	2.601	NRDC	rs1890946	0.107
rs7413471	T	C		non coding transcript variant	2.601	NRDC	rs1890946	0.107
rs10817969	T	G	0.2732	intron variant	1.291	ASTN2	rs10817969	0.1064
rs2418449	T	C	0.2732	intron variant	2.48	ASTN2	rs10817969	0.1064
rs1152578	T	C		intergenic variant	4.695	ESR2	rs1152578	0.1059
rs1152578	T	C		intergenic variant	4.695	SYNE2	rs1152578	0.1059
rs1152578	T	C		intron variant	4.695	ESR2	rs1152578	0.1059
rs1152578	T	C		NMD transcript variant	4.695	ESR2	rs1152578	0.1059
rs12666117	G	A	0.5136	intergenic variant	0.034		rs58104186	0.1031
rs58859119	G	A	0.3964	intergenic variant	1.766		rs16887442	0.103
rs13117122	T	C	0.1837	intergenic variant	0.755		rs35553410	0.1027
rs12069728	A	G	0.2374	intergenic variant	3.448		rs113188507	0.1015
rs67904215	G	A	0.237	intergenic variant	0.951		rs113188507	0.1015
rs67981315	C	T	0.2374	intergenic variant	0.227		rs113188507	0.1015
rs1570815	C	T		intron variant	1.722	SGIP1	rs10789214	0.1011
rs1570815	C	T		intron variant	1.722	AL139147.1	rs10789214	0.1011
rs1570815	C	T		non coding transcript variant	1.722	SGIP1	rs10789214	0.1011
rs1570815	C	T		non coding transcript variant	1.722	AL139147.1	rs10789214	0.1011
rs10890020	A	G	0.3438	intergenic variant	3.811		rs10890020	0.1002
Fine-mapped MD GVs with PICS (PICS probability > 10%) along with their reference (Ref) and alternative (Alt) allele; allele frequency (AF), consequence type, and mapped gene by VEP; potential pathogenicity score according to CADD; the lead GV it has been expanded from; and GWAS PICS probability. MD: major depression; GV: genetic variant; PICS: Probabilistic Identification of Causal SNPs; VEP: Var…

## Sheet: Supplementary Table S3
Supplementary Table S3. pGenes functional and disease enrichment analysis.
Term id	Term name	Source	Intersection Size	Query Size	Term Size	P-value
GO:0003674	molecular function	GO:MF	57	69	18679	2.63624166494951e-16
GO:0005488	binding	GO:MF	54	69	17070	2.64749341679486e-15
GO:0005515	protein binding	GO:MF	49	69	14767	1.38282649682115e-13
GO:1901363	heterocyclic compound binding	GO:MF	21	69	6210	0.00106056136530549
GO:0097159	organic cyclic compound binding	GO:MF	21	69	6291	0.00130266416225876
GO:0003676	nucleic acid binding	GO:MF	17	69	4252	0.00133230899109593
GO:0036002	pre-mRNA binding	GO:MF	3	69	37	0.00346530620793516
GO:0017124	SH3 domain binding	GO:MF	4	69	129	0.00493924613842587
GO:0005522	profilin binding	GO:MF	2	69	10	0.018554493274826
GO:0046872	metal ion binding	GO:MF	15	69	4265	0.0242131254093447
GO:0097157	pre-mRNA intronic binding	GO:MF	2	69	12	0.0271731844421982
GO:0043169	cation binding	GO:MF	15	69	4353	0.0304618970552164
GO:0003677	DNA binding	GO:MF	11	69	2488	0.0359683087350142
GO:0005575	cellular component	GO:CC	56	69	18964	3.61706561080711e-15
GO:0110165	cellular anatomical entity	GO:CC	55	69	18814	2.1837014439091e-14
GO:0043226	organelle	GO:CC	45	69	14027	2.48253594078495e-11
GO:0005622	intracellular anatomical structure	GO:CC	45	69	14808	1.92744421168896e-10
GO:0045202	synapse	GO:CC	16	69	1348	4.33498141917282e-10
GO:0030054	cell junction	GO:CC	18	69	2107	3.3989663140145e-09
GO:0005737	cytoplasm	GO:CC	38	69	11951	1.76710272392929e-08
GO:0043229	intracellular organelle	GO:CC	39	69	13117	6.39774642829532e-08
GO:0043227	membrane-bounded organelle	GO:CC	39	69	13201	7.80058228253144e-08
GO:0016020	membrane	GO:CC	33	69	9829	1.95947713909971e-07
GO:0098839	postsynaptic density membrane	GO:CC	6	69	94	2.7325029698826e-07
GO:0043231	intracellular membrane-bounded organelle	GO:CC	36	69	12046	5.0446525875763e-07
GO:0098794	postsynapse	GO:CC	10	69	641	6.61006320490814e-07
GO:0043005	neuron projection	GO:CC	13	69	1384	1.06927194835267e-06
GO:0014069	postsynaptic density	GO:CC	8	69	339	1.14254549729379e-06
GO:0099634	postsynaptic specialization membrane	GO:CC	6	69	120	1.1977822946821e-06
GO:0032279	asymmetric synapse	GO:CC	8	69	345	1.30956342531798e-06
GO:0099572	postsynaptic specialization	GO:CC	8	69	363	1.9435407535817e-06
GO:0098984	neuron to neuron synapse	GO:CC	8	69	371	2.30117887596638e-06
GO:0031224	intrinsic component of membrane	GO:CC	24	69	5873	2.76658377117176e-06
GO:0097060	synaptic membrane	GO:CC	8	69	384	3.00381521884582e-06
GO:0098590	plasma membrane region	GO:CC	12	69	1240	3.20708980499881e-06
GO:0120025	plasma membrane bounded cell projection	GO:CC	15	69	2234	5.42957404681472e-06
GO:0045211	postsynaptic membrane	GO:CC	7	69	282	7.70036104043872e-06
GO:0042995	cell projection	GO:CC	15	69	2337	9.79233755541817e-06
GO:0005634	nucleus	GO:CC	26	69	7607	2.12845631408474e-05
GO:0071944	cell periphery	GO:CC	23	69	6178	3.45077827894493e-05
GO:0016021	integral component of membrane	GO:CC	22	69	5718	4.00351378426493e-05
GO:0099055	integral component of postsynaptic membrane	GO:CC	5	69	118	5.44431432793033e-05
GO:0098936	intrinsic component of postsynaptic membrane	GO:CC	5	69	124	6.96909820217385e-05
GO:0099061	integral component of postsynaptic density membrane	GO:CC	4	69	51	7.69126068736784e-05
GO:0099146	intrinsic component of postsynaptic density membrane	GO:CC	4	69	55	0.000104608275510711
GO:0043232	intracellular non-membrane-bounded organelle	GO:CC	20	69	5094	0.00012537966943611
GO:0043228	non-membrane-bounded organelle	GO:CC	20	69	5102	0.000128531365756913
GO:0036477	somatodendritic compartment	GO:CC	9	69	875	0.000142509244113486
GO:0030424	axon	GO:CC	8	69	661	0.000186286127106052
GO:0099699	integral component of synaptic membrane	GO:CC	5	69	152	0.000191070009950781
GO:0030135	coated vesicle	GO:CC	6	69	296	0.000248857587051331
GO:0005829	cytosol	GO:CC	20	69	5361	0.000279699695021014
GO:0099240	intrinsic component of synaptic membrane	GO:CC	5	69	166	0.00029486775712858
GO:0099060	integral component of postsynaptic specialization membrane	GO:CC	4	69	74	0.000347217643932391
GO:0098948	intrinsic component of postsynaptic specialization membrane	GO:CC	4	69	78	0.000428970734824901
GO:0005887	integral component of plasma membrane	GO:CC	11	69	1643	0.000505174114816377
GO:0030136	clathrin-coated vesicle	GO:CC	5	69	194	0.000632777172588049
GO:0012505	endomembrane system	GO:CC	18	69	4651	0.000655885553362623
GO:0098978	glutamatergic synapse	GO:CC	6	69	354	0.00069734214460575
GO:0031226	intrinsic component of plasma membrane	GO:CC	11	69	1725	0.000803720382604102
GO:0030425	dendrite	GO:CC	7	69	641	0.001825850629809
GO:0097447	dendritic tree	GO:CC	7	69	643	0.00186295649921362
GO:0098793	presynapse	GO:CC	6	69	515	0.00580595149615861
GO:0031982	vesicle	GO:CC	15	69	4058	0.00882102938573526
GO:0005886	plasma membrane	GO:CC	18	69	5680	0.0100098227215453
GO:0043197	dendritic spine	GO:CC	4	69	186	0.013236500120624
GO:0044309	neuron spine	GO:CC	4	69	189	0.0140825083049118
GO:0032991	protein-containing complex	GO:CC	17	69	5541	0.025541624073778
GO:0032591	dendritic spine membrane	GO:CC	2	69	15	0.0276780568147341
GO:0098588	bounding membrane of organelle	GO:CC	10	69	2165	0.0343672908739174
GO:0005654	nucleoplasm	GO:CC	14	69	4112	0.0395791055235954
GO:0031090	organelle membrane	GO:CC	13	69	3644	0.0442186751820811
GO:0050794	regulation of cellular process	GO:BP	46	69	11517	1.24917689478533e-14
GO:0050789	regulation of biological process	GO:BP	46	69	12122	1.00259041391223e-13
GO:0065007	biological regulation	GO:BP	47	69	12802	1.17114866123994e-13
GO:0009987	cellular process	GO:BP	53	69	17186	1.809739110501e-13
GO:0008150	biological process	GO:BP	54	69	18099	2.52546341993372e-13
GO:0007399	nervous system development	GO:BP	24	69	2484	3.24501502922071e-13
GO:0032501	multicellular organismal process	GO:BP	37	69	8000	2.9605807602847e-12
GO:0048731	system development	GO:BP	29	69	5095	9.1970550655297e-11
GO:0007275	multicellular organism development	GO:BP	30	69	5670	1.87653603868302e-10
GO:0022008	neurogenesis	GO:BP	18	69	1698	8.52701628708872e-10
GO:0048856	anatomical structure development	GO:BP	30	69	6164	1.6503542800379e-09
GO:0032502	developmental process	GO:BP	31	69	6678	1.97660723130657e-09
GO:0048699	generation of neurons	GO:BP	16	69	1576	3.92894416465518e-08
GO:0030154	cell differentiation	GO:BP	24	69	4392	7.08779405792969e-08
GO:0048869	cellular developmental process	GO:BP	24	69	4468	1.01075659891155e-07
GO:0065008	regulation of biological quality	GO:BP	22	69	4116	9.08089022557721e-07
GO:0099537	trans-synaptic signaling	GO:BP	11	69	721	1.13202807733661e-06
GO:0099536	synaptic signaling	GO:BP	11	69	747	1.63789160912493e-06
GO:0016043	cellular component organization	GO:BP	27	69	6661	2.36985754719383e-06
GO:0007610	behavior	GO:BP	10	69	589	2.62418362333392e-06
GO:0050896	response to stimulus	GO:BP	32	69	9487	3.32768868737558e-06
GO:0071840	cellular component organization or biogenesis	GO:BP	27	69	6880	4.8317955336846e-06
GO:0048523	negative regulation of cellular process	GO:BP	23	69	5153	1.055262294815e-05
GO:0030182	neuron differentiation	GO:BP	13	69	1427	1.36504645911105e-05
GO:0007268	chemical synaptic transmission	GO:BP	10	69	713	1.60934637934627e-05
GO:0098916	anterograde trans-synaptic signaling	GO:BP	10	69	713	1.60934637934627e-05
GO:0051128	regulation of cellular component organization	GO:BP	16	69	2439	2.10882940389471e-05
GO:0048519	negative regulation of biological process	GO:BP	24	69	5861	2.3631400507132e-05
GO:0023052	signaling	GO:BP	26	69	6937	2.86149066578851e-05
GO:0007154	cell communication	GO:BP	26	69	6961	3.0741811894638e-05
GO:0007611	learning or memory	GO:BP	7	69	256	3.53239602036809e-05
GO:0007612	learning	GO:BP	6	69	147	3.59625666147243e-05
GO:0050890	cognition	GO:BP	7	69	297	9.74391683138867e-05
GO:0051171	regulation of nitrogen compound metabolic process	GO:BP	23	69	5886	0.000126807254770307
GO:0048518	positive regulation of biological process	GO:BP	24	69	6474	0.000159944002100381
GO:0048513	animal organ development	GO:BP	18	69	3701	0.000210703350845268
GO:0080090	regulation of primary metabolic process	GO:BP	23	69	6071	0.000223335823719147
GO:0060255	regulation of macromolecule metabolic process	GO:BP	24	69	6622	0.000245131266727933
GO:0071704	organic substance metabolic process	GO:BP	32	69	11397	0.000309785135172619
GO:0051716	cellular response to stimulus	GO:BP	26	69	7873	0.000377242217773876
GO:0048522	positive regulation of cellular process	GO:BP	22	69	5863	0.000549731889680571
GO:0007417	central nervous system development	GO:BP	10	69	1052	0.000593761023965853
GO:0043170	macromolecule metabolic process	GO:BP	29	69	9867	0.000651381638391748
GO:0007165	signal transduction	GO:BP	23	69	6447	0.000660529075185539
GO:0010646	regulation of cell communication	GO:BP	17	69	3634	0.000886532376978684
GO:0008152	metabolic process	GO:BP	32	69	11915	0.000886657422953805
GO:0044238	primary metabolic process	GO:BP	30	69	10642	0.00090635778686104
GO:0023051	regulation of signaling	GO:BP	17	69	3669	0.00101321944283861
GO:0007267	cell-cell signaling	GO:BP	12	69	1735	0.00105365510825653
GO:0019222	regulation of metabolic process	GO:BP	24	69	7175	0.001088382113673
GO:0050804	modulation of chemical synaptic transmission	GO:BP	7	69	434	0.00125427603076245
GO:0099177	regulation of trans-synaptic signaling	GO:BP	7	69	435	0.00127364873624046
GO:0048468	cell development	GO:BP	13	69	2122	0.00131567559141796
GO:0120035	regulation of plasma membrane bounded cell projection organization	GO:BP	8	69	642	0.00133213659609008
GO:0048666	neuron development	GO:BP	10	69	1159	0.00142738942865759
GO:0031344	regulation of cell projection organization	GO:BP	8	69	660	0.00163730369239991
GO:0044237	cellular metabolic process	GO:BP	30	69	10941	0.00166838611746047
GO:0031323	regulation of cellular metabolic process	GO:BP	22	69	6309	0.00192668675915457
GO:0051179	localization	GO:BP	23	69	6938	0.0024150418961584
GO:0048583	regulation of response to stimulus	GO:BP	18	69	4416	0.00279268761074555
GO:0120036	plasma membrane bounded cell projection organization	GO:BP	11	69	1596	0.00339911809626068
GO:0006807	nitrogen compound metabolic process	GO:BP	28	69	10148	0.00429175173114828
GO:0030030	cell projection organization	GO:BP	11	69	1636	0.00431056443331665
GO:0031175	neuron projection development	GO:BP	9	69	1021	0.00448344962135923
GO:0044260	cellular macromolecule metabolic process	GO:BP	25	69	8430	0.00543421540849038
GO:0060322	head development	GO:BP	8	69	816	0.00783555202422076
GO:0051252	regulation of RNA metabolic process	GO:BP	16	69	3847	0.00944015229684261
GO:0009893	positive regulation of metabolic process	GO:BP	16	69	3873	0.0102831710676445
GO:0050877	nervous system process	GO:BP	10	69	1466	0.0114671994072009
GO:0050793	regulation of developmental process	GO:BP	13	69	2621	0.0133024917992187
GO:2000741	positive regulation of mesenchymal stem cell differentiation	GO:BP	2	69	4	0.0141731164708916
GO:0022607	cellular component assembly	GO:BP	14	69	3104	0.0165613607948331
GO:0010604	positive regulation of macromolecule metabolic process	GO:BP	15	69	3568	0.0173934567352211
GO:0016358	dendrite development	GO:BP	5	69	247	0.0181647624069265
GO:0019219	regulation of nucleobase-containing compound metabolic process	GO:BP	16	69	4123	0.0225797021772794
GO:0010975	regulation of neuron projection development	GO:BP	6	69	455	0.0257892169611418
GO:0010468	regulation of gene expression	GO:BP	18	69	5218	0.028635189258047
GO:2000739	regulation of mesenchymal stem cell differentiation	GO:BP	2	69	6	0.0353805902710406
GO:0032879	regulation of localization	GO:BP	13	69	2906	0.0396908061991695
GO:0051234	establishment of localization	GO:BP	18	69	5364	0.0415687628377971
GO:0044085	cellular component biogenesis	GO:BP	14	69	3377	0.0425165013719849
REAC:R-HSA-1640170	Cell Cycle	REAC	6	69	679	0.0372601708555346
REAC:R-HSA-8876198	RAB GEFs exchange GTP for GDP on RABs	REAC	3	69	88	0.0422804958437543
MIRNA:hsa-let-7b-5p	hsa-let-7b-5p	MIRNA	12	69	1213	5.75694817973677e-06
MIRNA:hsa-miR-26b-5p	hsa-miR-26b-5p	MIRNA	12	69	1851	0.000532947731882429
MIRNA:hsa-miR-140-5p	hsa-miR-140-5p	MIRNA	4	69	100	0.00264506297058162
MIRNA:hsa-miR-155-5p	hsa-miR-155-5p	MIRNA	8	69	900	0.00410514978405265
MIRNA:hsa-miR-335-5p	hsa-miR-335-5p	MIRNA	12	69	2570	0.0146042559471449
HP:0001288	Gait disturbance	HP	11	69	1002	1.85664932992979e-05
HP:0012639	Abnormal nervous system morphology	HP	16	69	2677	4.22894605495656e-05
HP:0011442	Abnormal central motor function	HP	13	69	1719	6.61840233843092e-05
HP:0001760	Abnormal foot morphology	HP	11	69	1219	0.000133655092845777
HP:0100022	Abnormality of movement	HP	13	69	1842	0.000146396297879532
HP:0000707	Abnormality of the nervous system	HP	17	69	3446	0.000231771332024581
HP:0011842	Abnormality of skeletal morphology	HP	15	69	2730	0.000354231458893632
HP:0000118	Phenotypic abnormality	HP	19	69	4506	0.000433226271793093
HP:0000924	Abnormality of the skeletal system	HP	15	69	2831	0.000560610042842786
HP:0002011	Morphological central nervous system abnormality	HP	14	69	2483	0.000684809685025181
HP:0000006	Autosomal dominant inheritance	HP	12	69	1783	0.000772898044406675
HP:0001344	Absent speech	HP	6	69	277	0.00082968216642992
HP:0002814	Abnormality of the lower limb	HP	11	69	1471	0.000850938816211371
HP:0033127	Abnormality of the musculoskeletal system	HP	16	69	3353	0.000878583357090003
HP:0002493	Upper motor neuron dysfunction	HP	10	69	1188	0.000982221429259018
HP:0002500	Abnormal cerebral white matter morphology	HP	9	69	918	0.00103629839699907
HP:0003808	Abnormal muscle tone	HP	12	69	1838	0.00106127394607071
HP:0001347	Hyperreflexia	HP	8	69	678	0.00110220960949126
HP:0012443	Abnormality of brain morphology	HP	13	69	2268	0.00151820701941736
HP:0009121	Abnormal axial skeleton morphology	HP	13	69	2318	0.00193054759925948
HP:0004305	Involuntary movements	HP	9	69	993	0.00197040176759375
HP:0010993	Abnormality of the cerebral subcortex	HP	9	69	1009	0.0022441721363585
HP:0012638	Abnormal nervous system physiology	HP	15	69	3221	0.00278419395967362
HP:0001250	Seizure	HP	11	69	1707	0.00356304805378474
HP:0000750	Delayed speech and language development	HP	8	69	798	0.00366787456950314
HP:0031826	Abnormal reflex	HP	9	69	1076	0.00377777591553917
HP:0000005	Mode of inheritance	HP	17	69	4220	0.00378392274325437
HP:0002167	Neurological speech impairment	HP	10	69	1407	0.00441141795089277
HP:0011283	Abnormality of the metencephalon	HP	8	69	821	0.00451444461884826
HP:0011282	Abnormality of hindbrain morphology	HP	8	69	821	0.00451444461884826
HP:0002463	Language impairment	HP	8	69	828	0.004802862610449
HP:0003011	Abnormality of the musculature	HP	13	69	2526	0.00492651915137897
HP:0002311	Incoordination	HP	5	69	214	0.00499826924802529
HP:0010535	Sleep apnea	HP	4	69	98	0.00523037620789929
HP:0011804	Abnormal muscle physiology	HP	12	69	2194	0.00651920037424568
HP:0000078	Abnormality of the genital system	HP	10	69	1489	0.00723610187621824
HP:0012373	Abnormal eye physiology	HP	12	69	2218	0.0072743368055496
HP:0030301	Abnormality of the anterior commissure	HP	2	69	4	0.0078096764227362
HP:0000496	Abnormality of eye movement	HP	10	69	1531	0.00921198128531404
HP:0004323	Abnormality of body weight	HP	10	69	1554	0.0104800467789907
HP:0000478	Abnormality of the eye	HP	13	69	2727	0.0111899131119578
HP:0000119	Abnormality of the genitourinary system	HP	12	69	2317	0.01126625239247
HP:0001252	Hypotonia	HP	10	69	1574	0.0117027489143997
HP:0002650	Scoliosis	HP	8	69	945	0.0125010416466512
HP:0003459	Polyclonal elevation of IgM	HP	2	69	5	0.0130065355326763
HP:0001263	Global developmental delay	HP	10	69	1612	0.0143685817664118
HP:0012758	Neurodevelopmental delay	HP	11	69	1989	0.0149654945105696
HP:0040064	Abnormality of limbs	HP	11	69	2010	0.0164913092106572
HP:0011446	Abnormality of higher mental function	HP	12	69	2434	0.0183651231153297
HP:0000925	Abnormality of the vertebral column	HP	9	69	1313	0.0184346058642008
HP:0001367	Abnormal joint morphology	HP	8	69	1010	0.0201169161116842
HP:0033725	Thin corpus callosum	HP	7	69	728	0.020243137876022
HP:0012759	Neurodevelopmental abnormality	HP	12	69	2459	0.0203106364957033
HP:0010674	Abnormality of the curvature of the vertebral column	HP	8	69	1020	0.0215780759902995
HP:0005280	Depressed nasal bridge	HP	6	69	503	0.0249334890951772
HP:0002060	Abnormal cerebral morphology	HP	10	69	1733	0.0266406329280938
HP:0100851	Abnormal emotion/affect behavior	HP	6	69	510	0.0269322165109299
HP:0011843	Abnormality of musculoskeletal physiology	HP	9	69	1393	0.0292630810097687
HP:0006919	Abnormal aggressive, impulsive or violent behavior	HP	5	69	310	0.0297386677577515
HP:0100547	Abnormality of forebrain morphology	HP	10	69	1762	0.0306564733295663
HP:0007367	Atrophy/Degeneration affecting the central nervous system	HP	7	69	779	0.0311256186294284
HP:0002817	Abnormality of the upper limb	HP	9	69	1405	0.0312799248901467
HP:0100716	Self-injurious behavior	HP	4	69	157	0.0335337361263524
HP:0001273	Abnormal corpus callosum morphology	HP	7	69	791	0.0342850516763954
HP:0000539	Abnormality of refraction	HP	6	69	535	0.0351497040576988
HP:0012110	Hypoplasia of the pons	HP	3	69	55	0.0362367952479563
HP:0001845	Overlapping toe	HP	3	69	55	0.0362367952479563
HP:0001257	Spasticity	HP	7	69	803	0.0377039315945509
HP:0011729	Abnormality of joint mobility	HP	8	69	1105	0.03801007143287
HP:0011793	Neoplasm by anatomical site	HP	7	69	812	0.0404480912754429
HP:0001317	Abnormal cerebellum morphology	HP	7	69	815	0.0413984882882199
HP:0003674	Onset	HP	8	69	1147	0.0493787613101101
WP:WP3995	Prion disease pathway	WP	3	69	37	0.000916936694195901
WP:WP4312	Rett syndrome causing genes	WP	3	69	49	0.00215303310276429
WP:WP4673	Genes involved in male infertility	WP	4	69	155	0.00268539930582622
WP:WP4816	TGF-beta Receptor Signalling in Skeletal Dysplasias	WP	3	69	62	0.00437305436055834
WP:WP3657	Hematopoietic Stem Cell Gene Regulation by GABP alpha/beta Complex	WP	2	69	22	0.0249808918317453
WP:WP179	Cell Cycle	WP	3	69	122	0.0325105870361774
WP:WP4217	Ebola Virus Pathway on Host	WP	3	69	130	0.0391396569743011
DISGENET:C0011574	Involutional Depression	DISGENET Plus	40	61	464	2.79689861287677e-49
DISGENET:C1571984	Psychosis, Involutional	DISGENET Plus	40	61	464	2.79689861287677e-49
DISGENET:C1571983	Involutional paraphrenia	DISGENET Plus	40	61	467	3.65069144425476e-49
DISGENET:C1269683	Major Depressive Disorder	DISGENET Plus	42	61	1417	9.59387251359838e-33
DISGENET:C0005586	Bipolar Disorder	DISGENET Plus	32	61	1451	8.60620519290202e-19
DISGENET:C0008074	Child Development Disorders, Pervasive	DISGENET Plus	18	61	220	1.0404712826223e-18
DISGENET:C1321905	Minimal Brain Dysfunction	DISGENET Plus	17	61	183	1.88736814964307e-18
DISGENET:C0041671	Attention Deficit Disorder	DISGENET Plus	17	61	264	1.04520411605764e-15
DISGENET:C0524528	Pervasive Development Disorder	DISGENET Plus	28	61	1289	1.54985162861253e-15
DISGENET:C0028768	Obsessive-Compulsive Disorder	DISGENET Plus	17	61	342	8.29884867942828e-14
DISGENET:C0040517	Gilles de la Tourette syndrome	DISGENET Plus	15	61	246	3.71539246277429e-13
DISGENET:C0003125	Anorexia Nervosa	DISGENET Plus	15	61	296	5.82244634763788e-12
DISGENET:C0021704	Intelligence	DISGENET Plus	18	61	659	2.78754539704899e-10
DISGENET:C0036341	Schizophrenia	DISGENET Plus	32	61	2941	8.35851732095812e-10
DISGENET:C0596887	Mathematical Ability	DISGENET Plus	19	61	877	3.04755720887544e-09
DISGENET:C0525045	Mood Disorders	DISGENET Plus	16	61	649	3.86832607708515e-08
DISGENET:C0004352	Autistic Disorder	DISGENET Plus	20	61	1239	1.41227815529463e-07
DISGENET:C1263846	Attention deficit hyperactivity disorder	DISGENET Plus	18	61	983	2.1761512297828e-07
DISGENET:C1842981	NEUROTICISM	DISGENET Plus	9	61	159	1.33938594596246e-06
DISGENET:C1305855	Body mass index	DISGENET Plus	18	61	1273	1.35572130749561e-05
DISGENET:C0041696	Unipolar Depression	DISGENET Plus	16	61	993	1.88985748960277e-05
DISGENET:C0344315	Depressed mood	DISGENET Plus	19	61	1500	2.73719462816408e-05
DISGENET:C0004936	Mental disorders	DISGENET Plus	15	61	877	2.77383052703359e-05
DISGENET:C0557163	Household income	DISGENET Plus	8	61	157	3.00679068884602e-05
DISGENET:C0011570	Mental Depression	DISGENET Plus	19	61	1513	3.14881160933089e-05
DISGENET:C1510586	Autism Spectrum Disorders	DISGENET Plus	18	61	1379	4.70259431310236e-05
DISGENET:C0233514	Abnormal behavior	DISGENET Plus	16	61	1066	5.12883828135364e-05
DISGENET:C1314691	Age at menarche	DISGENET Plus	9	61	270	0.000136708026500765
DISGENET:C5243477	Anxiousness	DISGENET Plus	6	61	75	0.000155162299045554
DISGENET:C0027769	Nervousness	DISGENET Plus	6	61	77	0.000181921207548643
DISGENET:C0235013	Hypervigilance	DISGENET Plus	6	61	81	0.000246905153768008
DISGENET:C0003467	Anxiety	DISGENET Plus	17	61	1382	0.000306172502120563
DISGENET:C0027932	Neurotic Disorders	DISGENET Plus	5	61	45	0.000396293133509167
DISGENET:C0005890	Body Height	DISGENET Plus	21	61	2223	0.000597859577807808
DISGENET:C0011581	Depressive disorder	DISGENET Plus	19	61	1821	0.000599993713256369
DISGENET:C4025843	Abnormality of refraction	DISGENET Plus	9	61	337	0.000895380113118834
DISGENET:C0424166	Social Anxiety	DISGENET Plus	6	61	116	0.00209519892849227
DISGENET:C1519383	Smoking Behaviors	DISGENET Plus	9	61	391	0.00308663594258397
DISGENET:C0036572	Seizures	DISGENET Plus	20	61	2363	0.00732036234030466
DISGENET:C0424574	Duration of sleep	DISGENET Plus	7	61	244	0.0125148551068351
DISGENET:C1535926	Neurodevelopmental Disorders	DISGENET Plus	11	61	766	0.0179210623164997
DISGENET:C3203509	Neuropsychiatric syndrome	DISGENET Plus	8	61	384	0.0264054762540149
DISGENET:C0085134	Cessation of smoking	DISGENET Plus	4	61	54	0.0391120132436209
Functional and disease enrichment analysis of pGenes with gProfiler. pGenes: proximal genes.

## Sheet: Supplementary Table S4
Supplementary Table S4. Fine-mapped MD causal GVs disease enrichment analysis.
Term id	Term name	Source	Intersection Size	Query Size	Term Size	P-value
DISGENET:C0011574	Involutional Depression	DISGENET Plus	21	30	620	1.65478579189128e-42
DISGENET:C1571984	Psychosis, Involutional	DISGENET Plus	21	30	620	1.65478579189128e-42
DISGENET:C1571983	Involutional paraphrenia	DISGENET Plus	21	30	620	1.65478579189128e-42
DISGENET:C1269683	Major Depressive Disorder	DISGENET Plus	21	30	978	2.6460766443244e-38
DISGENET:C0005586	Bipolar Disorder	DISGENET Plus	11	30	777	2.34537256528347e-16
DISGENET:C0003125	Anorexia Nervosa	DISGENET Plus	5	30	144	1.5920342773946e-08
DISGENET:C0040517	Gilles de la Tourette syndrome	DISGENET Plus	5	30	145	1.64869118318003e-08
DISGENET:C0028768	Obsessive-Compulsive Disorder	DISGENET Plus	5	30	186	5.78648133291598e-08
DISGENET:C1321905	Minimal Brain Dysfunction	DISGENET Plus	5	30	208	1.01509569183865e-07
DISGENET:C0041671	Attention Deficit Disorder	DISGENET Plus	5	30	216	1.22692760796661e-07
DISGENET:C0008074	Child Development Disorders, Pervasive	DISGENET Plus	5	30	297	6.04760764062336e-07
DISGENET:C1263846	Attention deficit hyperactivity disorder	DISGENET Plus	5	30	467	5.7640653502794e-06
DISGENET:C0524528	Pervasive Development Disorder	DISGENET Plus	5	30	515	9.3649248788456e-06
DISGENET:C0036341	Schizophrenia	DISGENET Plus	5	30	2429	0.0175596789153256
Disease enrichment analysis of fine-mapped MD causal GVs with gProfiler. MD: major depression; GV: genetic variant.

## Sheet: Supplementary Table S5
Supplementary Table S5. Colocalizing GWAS-eQTLs association to disease.
GV	Disease name	Disease Class (MESH)	Score
rs10149470	Schizophrenia	Mental Disorders (F03)	0.6
rs10149470	Intelligence	Behavior and Behavior Mechanisms (F01)	0.6
rs10149470	Pervasive Development Disorder	Mental Disorders (F03)	0.6
rs10149470	Minimal Brain Dysfunction	Mental Disorders (F03)	0.6
rs301799	Involutional Depression	Mental Disorders (F03)	0.6
rs10149470	Gilles de la Tourette syndrome	Congenital, Hereditary, and Neonatal Diseases and Abnormalities (C16); Mental Disorders (F03); Nervous System Diseases (C10)	0.6
rs301799	Gilles de la Tourette syndrome	Congenital, Hereditary, and Neonatal Diseases and Abnormalities (C16); Mental Disorders (F03); Nervous System Diseases (C10)	0.6
rs10149470	Attention Deficit Disorder	Mental Disorders (F03)	0.6
rs12624433	Attention Deficit Disorder	Mental Disorders (F03)	0.6
rs12624433	Schizophrenia	Mental Disorders (F03)	0.6
rs12624433	Bipolar Disorder	Mental Disorders (F03)	0.6
rs10149470	Involutional paraphrenia	Mental Disorders (F03)	0.6
rs12624433	Involutional paraphrenia	Mental Disorders (F03)	0.6
rs10149470	Psychosis, Involutional	Mental Disorders (F03)	0.6
rs301799	Attention deficit hyperactivity disorder	Mental Disorders (F03)	0.6
rs12624433	Major Depressive Disorder	Mental Disorders (F03)	0.6
rs10149470	Anorexia Nervosa	Mental Disorders (F03)	0.6
rs301799	Involutional paraphrenia	Mental Disorders (F03)	0.6
rs301799	Bipolar Disorder	Mental Disorders (F03)	0.6
rs10149470	Attention deficit hyperactivity disorder	Mental Disorders (F03)	0.6
rs12624433	Attention deficit hyperactivity disorder	Mental Disorders (F03)	0.6
rs301799	Pervasive Development Disorder	Mental Disorders (F03)	0.6
rs10149470	Major Depressive Disorder	Mental Disorders (F03)	0.6
rs10149470	Child Development Disorders, Pervasive	Mental Disorders (F03)	0.6
rs12624433	Minimal Brain Dysfunction	Mental Disorders (F03)	0.6
rs12624433	Involutional Depression	Mental Disorders (F03)	0.6
rs10149470	Bipolar Disorder	Mental Disorders (F03)	0.6
rs301799	Schizophrenia	Mental Disorders (F03)	0.6
rs198457	Involutional paraphrenia	Mental Disorders (F03)	0.6
rs12624433	Psychosis, Involutional	Mental Disorders (F03)	0.6
rs301799	Psychosis, Involutional	Mental Disorders (F03)	0.6
rs12624433	Pervasive Development Disorder	Mental Disorders (F03)	0.6
rs301799	Child Development Disorders, Pervasive	Mental Disorders (F03)	0.6
rs12624433	Mathematical Ability	Psychological Phenomena (F02)	0.6
rs301799	Major Depressive Disorder	Mental Disorders (F03)	0.6
rs301799	Minimal Brain Dysfunction	Mental Disorders (F03)	0.6
rs301799	Attention Deficit Disorder	Mental Disorders (F03)	0.6
rs198457	Psychosis, Involutional	Mental Disorders (F03)	0.6
rs10149470	Involutional Depression	Mental Disorders (F03)	0.6
rs198457	Involutional Depression	Mental Disorders (F03)	0.6
rs301799	Anorexia Nervosa	Mental Disorders (F03)	0.6
rs12624433	Child Development Disorders, Pervasive	Mental Disorders (F03)	0.6
rs198457	Major Depressive Disorder	Mental Disorders (F03)	0.6
GV colocalizing GWAS and cis-eQTLs, association to disease with DISGENET Plus. GV: genetic variant; GWAS: genome-wide association studies; eQTL: expression quantitative trait loci.

## Sheet: Supplementary Table S6
Supplementary Table S6. TFBS analysis.
GV	TF	PSSM	Best variant	Worst variant	P-value ratio	Weight difference	Test Permutation	Test Negative control
rs12033847	BACH1	BACH1_1	T	C	846.15	15	0.0500604814682431	0.0454365460306674
rs12033847	RXRA	RXRA_disc3	T	C	3380.28	15.01	0.0486995237445159	0.0590371375636728
rs12033847	RXRA	RXRA_disc3	T	C	3582.09	14.99	0.0490360201298609	0.0505672924054904
rs12033847	BACH1	BACH1_1	T	C	1250	15.01	0.05324689464232	0.0446395499596961
rs12033847	BACH1	BACH1_1	T	C	1341.46	15.04	0.0567181904180913	0.0466178341851768
rs10913131	ARID3A	ARID3A_2	T	C	241.67	5.61	0.0432822854999103	0.0460522515169691
rs10913131	ARID3A	ARID3A_2	T	C	245.45	5.59	0.0437730972888571	0.0435228165851682
rs10218714	PRDM1	MA0508.3	C	G	48.78	5.55	0.0436500913614739	0.0523192716943218
rs10218714	PRDM1	MA0508.3	C	G	52.5	5.62	0.045523735240513	0.0516317355057922
rs10913133	RFX5	MA0510.1	C	T	59.18	9.57	0.0484056711657285	0.100568345910001
rs6673760	POU2F2	POU2F2_known12	A	G	7333.33	14.83	0.0511404497579231	0.0436167520241144
rs6673760	POU2F2	POU2F2_known13	A	G	189.66	3.48	0.0435637894125142	0.0435207175010791
rs6673760	POU2F2	POU2F2_known13	A	G	178.57	3.48	0.044619029700685	0.0428185085200359
rs6673760	POU2F2	POU2F2_known11	A	G	10909.09	14.95	0.0488046674237485	0.0446714910698723
rs6673760	POU2F2	POU2F2_known12	A	G	10000	14.85	0.0439032107993463	0.0470714844532387
rs6673760	POU2F2	POU2F2_known11	A	G	12000	14.97	0.0479058663345662	0.0452994414147552
rs7514517	GABPA	MA0062.3	T	C	39.17	4.29	0.0498523294049483	0.0491489669113795
rs16851143	POU2F2	POU2F2_known5	A	C	141.67	15.23	0.0486065529167975	0.0539947152330322
rs10442601	MYNN	M01370	T	A	168.75	7.49	0.0461857856168906	0.047030056680269
rs199923	NRF1	NRF1_disc1	G	A	2337.66	15.31	0.0520613666593884	0.0497187898310495
rs199923	NRF1	M01434	G	A	184.62	7.72	0.050267284145956	0.0460418607800095
rs17641524	POU2F2	POU2F2_known6	C	T	352	15.43	0.0466178341851768	0.0524235616092719
rs12123169	FOXP1	FOXP1_1	A	T	427.27	14.42	0.0604878986227735	0.044878099511791
rs12123169	FOXP1	FOXP1_1	A	T	418.18	14.45	0.0458793579758488	0.0528785818705352
rs218985	STAT3	MA0144.2	T	C	98.31	10.98	0.0496416666848746	0.0729019141883319
rs10908329	MITF	M01354	C	T	53.57	7.35	0.0713101293560482	0.0473475235658432
rs10796897	RAD21	RAD21_disc7	G	A	290	14.76	0.0460855166423789	0.048198443750307
rs10796897	RAD21	RAD21_disc7	G	A	281.25	14.91	0.0495010548993172	0.0472170896733536
rs10796897	RAD21	RAD21_disc7	G	A	300	14.74	0.0484549377932747	0.0438011645025833
rs10796897	YY1	YY1_disc4	G	A	3783.78	14.77	0.0450698851984211	0.0458656441636897
rs10796897	RAD21	RAD21_disc7	G	A	284.21	14.9	0.0639707215172396	0.047931366695457
rs905108	RXRA	RXRA_known3	T	A	293.75	15.08	0.0532900319236823	0.0457682872311976
rs10908335	GATA1	GATA1_GATA1_HUMAN.H10MO.A	G	A	280	7.09	0.0481843246232715	0.0458141551732392
rs10908335	GATA2	M01184	G	A	389.83	7.7	0.0496490311317048	0.0454543523184166
rs10908335	GATA2	M01184	G	A	322.92	7.72	0.0564414060323907	0.0494605452198664
rs10908335	GATA2	M01184	G	A	415.09	7.69	0.04673438906857	0.0492995895697567
rs10908335	GATA1	GATA1_GATA1_HUMAN.H10MO.A	G	A	288.89	7.08	0.0463268272283617	0.0449961784164489
rs10796899	FOSL2	FOSL2__JUNDvar.2_MA1145.1_JASPAR	A	G	29.79	4.91	0.0753987285053657	0.04624345216009
rs10796899	FOSL1	FOSL1	A	G	31.25	2.99	0.0462464313676788	0.0642058764685589
rs10796899	FOSL2	FOSL2__JUNBvar.2_MA1139.1_JASPAR	A	G	25.64	4.93	0.0617081015286567	0.0486685349093557
rs10796899	ATF1	ATF1_ATF1_HUMAN.H10MO.B	A	G	137.93	4.1	0.0700705260177218	0.0484205106878478
rs10796899	ATF2	MA1632.1	A	G	52	5.77	0.0494400361660949	0.0467765862297373
rs10796899	ATF2	MA1632.1	A	G	51.33	5.75	0.0531198724578477	0.0440870022884161
rs10796899	ATF2	ATF2_MA1632.1_JASPAR	A	G	51.33	5.75	0.0475919992542309	0.0440870022884161
rs10796899	FOSL2	FOSL2__JUNDvar.2_MA1145.1_JASPAR	A	G	27.66	4.89	0.0613487127269817	0.0479479367684878
rs10796899	ATF2	ATF2_MA1632.1_JASPAR	A	G	52	5.77	0.0567961774191467	0.0467765862297373
rs10796899	JUN	JUN__JUNBvar.2_MA1133.1_JASPAR	A	G	28.07	4.06	0.0557856549896555	0.048260682302312
rs10796899	FOSL1	FOSL1__JUNDvar.2_MA1143.1_JASPAR	A	G	45.45	2.78	0.0671227199085102	0.0479929374235561
rs10796899	JUN	JUN__JUNBvar.2_MA1133.1_JASPAR	A	G	27.59	4.04	0.0484147319604752	0.0450511252496259
rs10796899	FOS	FOS__JUNvar.2_MA1126.1_JASPAR	A	G	48.89	4.21	0.0589393545056776	0.0487453587405052
rs10796899	FOS	FOS__JUNvar.2_MA1126.1_JASPAR	A	G	48.33	4.22	0.0489530947941039	0.0470058192417399
rs10796899	FOSL2	FOSL2__JUNvar.2_MA1131.1_JASPAR	A	G	26.07	4.37	0.149046411002354	0.0470082241498167
rs10796899	FOSL1	FOSL1__JUNDvar.2_MA1143.1_JASPAR	A	G	38.46	2.72	0.0722393591242073	0.0458890575019408
rs12025331	TCF12	TCF12_disc5	C	T	86.27	15.16	0.0471929705525732	0.0672858026376162
rs80204627	TEAD4	M01622	C	T	200	4.11	0.0517665110327851	0.0446606893225395
rs80204627	POU2F2	POU2F2_POU2F2_5_HT-SELEX2	C	T	833.33	10.99	0.0473946188045471	0.0476894387886712
rs80204627	TEAD4	M01622	C	T	160	3.98	0.0466365809842775	0.0467663534315498
rs80204627	TEAD4	TEAD4_TEAD4_HUMAN.H10MO.A	C	T	90.48	4.52	0.0628152729062682	0.0492444599410175
rs80204627	POU2F2	POU2F2_M4470_1.02_CISBP	C	T	40.98	4.39	0.0492419014337612	0.0696784461112142
rs80204627	TEAD4	TEAD4_TEAD4_HUMAN.H10MO.A	C	T	108.57	4.65	0.0500948628794045	0.0484481426070354
rs2077725	POU2F2	POU2F2_known12	A	G	3414.63	14.84	0.0466289031361528	0.0556070793305493
rs2077725	YY1	YY1_known1	A	G	290000	14.94	0.0473833317398556	0.0438726988971843
rs2077725	POU2F2	POU2F2_known12	A	G	3170.73	14.87	0.0484610642990422	0.0494164046416607
rs2077725	YY1	YY1_known1	A	G	399999.97	14.95	0.0446984742918985	0.0427127106799506
rs2077725	YY1	YY1_known5	A	G	7000	14.98	0.0453027555511285	0.0446242861940935
rs2077725	YY1	YY1_known5	A	G	8200	15.01	0.0533655120385662	0.0490927423158145
rs2077725	SRF	SRF_known5	A	G	400	14.39	0.0694211119219669	0.0488044724961527
rs2077725	YY1	YY1_known1	A	G	446153.81	14.98	0.0503511157587575	0.0431415762240308
rs6588415	NR3C1	NR3C1_known7	G	A	1852.94	14.93	0.0488694173476758	0.0627064127631847
rs1890946	NEUROD1	MA1109.1	C	T	100	3.77	0.0492164698639541	0.0444257775818088
rs1890946	NEUROD1	MA1109.1	C	T	118.28	3.83	0.0465517393760994	0.0437654624307667
rs1890946	NEUROD1	MA1109.1	C	T	135.14	3.81	0.049991712460322	0.050121721916381
rs1890946	YY1	YY1_known4	C	T	2456.14	14.85	0.0477250697672687	0.0717711098361339
rs736756	SP1	SP1_SP1_HUMAN.H10MO.C	C	A	136.36	6.51	0.0493062704512426	0.049401353439849
rs736756	SP1	SP1_SP1_HUMAN.H10MO.C	C	A	106.25	6.47	0.0541641284051657	0.0489984206210176
rs736756	SP1	SP1_SP1_HUMAN.H10MO.C	C	A	113.33	6.47	0.0538617242117617	0.0432346413231184
rs3101341	STAT3	MA0144.2	T	C	448.72	11.48	0.0462489477221551	0.0475117784083536
rs3101341	STAT3	MA0144.2	T	C	448.28	11.39	0.0461875074588591	0.0457275663789442
rs3101341	STAT3	MA0144.2	T	C	436.78	11.38	0.0496416666848746	0.0441202428216524
rs3101339	ATF3	ATF3_disc4	C	A	2769.23	15.1	0.0490331387160409	0.0517641494434312
rs3101339	BHLHE40	BHLHE40_disc2	C	A	2225	14.36	0.0468893549589148	0.0459330046794266
rs3101339	ESRRA	ESRRA_disc4	C	A	311.76	14.36	0.0598509785195286	0.0491470940169228
rs3101339	ESRRA	ESRRA_disc4	C	A	331.25	14.37	0.0505634046162629	0.049630635791508
rs3101339	NRF1	NRF1_disc3	C	A	7777.78	15.37	0.0455082288588924	0.0449905457112976
rs3101339	NRF1	NRF1_disc3	C	A	8285.71	15.34	0.0441798914765727	0.0441103000231495
rs3101339	BHLHE40	BHLHE40_disc2	C	A	766.67	14.75	0.052673733088331	0.0474498117894497
rs3101339	BHLHE40	BHLHE40_disc2	C	A	2000	14.34	0.0479417933986778	0.0486334971145311
rs3101339	ATF3	ATF3_disc4	C	A	2769.23	15.11	0.0605907736945688	0.0478303813424507
rs11210118	SPI1	SPI1_known1	T	C	124.14	15.04	0.0492101118097107	0.0473934838771859
rs11210118	SPI1	SPI1_known1	T	C	124.14	15.04	0.0479476219939304	0.0547532212851514
rs12139217	FOS	FOS_FOS_HUMAN.H10MO.A	A	G	44.07	7.43	0.0750656190261099	0.0466990062235563
rs12139217	FOSL1	FOSL1__JUN_MA1128.1_JASPAR	A	G	42.31	6.37	0.0496490311317048	0.0654811920680016
rs12139217	JUNB	JUNB_JUNB_HUMAN.H10MO.C	A	G	70.83	7.44	0.0467910478635863	0.045180671749677
rs4128552	ZNF207	ZNF207	T	G	26.67	4.35	0.0603454002637228	0.0493289247057095
rs4128551	RUNX3	RUNX3_RUNX3_HUMAN.H10MO.C	C	T	111.11	7.58	0.0491171799922072	0.0507886016556888
rs4128551	POU2F2	POU2F2_known8	T	C	1281.25	15.46	0.0479513822162794	0.0495922211330541
rs4128551	POU2F2	POU2F2_known5	T	C	1142.86	15.28	0.0482566130505148	0.0440698697199567
rs12136559	MYC	MYC_known18	T	G	2137.93	15.33	0.047053916091583	0.052152634515874
rs12136559	MAX	MAX__MYC_MA0059.1_JASPAR	T	G	34.21	4.76	0.0920170685099362	0.0474829536282175
rs12136559	MAX	MAX_MAX_4_HT-SELEX2	T	G	282.61	10.58	0.0664908784799669	0.0489081012574074
rs12136559	MYC	MYC_disc2	T	G	2812.5	15.46	0.0659293707433447	0.0454959115807036
rs12136559	MAX	MAX_MAX_4_HT-SELEX2	T	G	545.45	10.75	0.0664908784799669	0.0489081012574074
rs12136559	MYC	MYC_known12	T	G	127.03	15.36	0.0521601291729093	0.0430853243152426
rs12136559	MYC	M01368	T	G	121.21	7.94	0.0498062344206894	0.0446817646575691
rs12136559	MAX	MAX_MAX_HUMAN.H10MO.A	T	G	60.83	5.18	0.0474650604947518	0.0507445937090621
rs12136559	MYC	MYC_known19	T	G	114.52	5.81	0.0498300806907116	0.0514834201856944
rs12136559	MAX	MAX_MAX_HUMAN.H10MO.A	T	G	61.67	5.18	0.0743527910630743	0.0469360635207617
rs12136559	MYC	MYC_known19	T	G	100	5.89	0.0498300806907116	0.0514834201856944
rs12136559	MNT	MNT_1	T	G	5312.5	15.38	0.0536485366760022	0.0446346414311741
rs12136559	MYC	MYC_known5	T	G	8035.71	15.36	0.0517376606574562	0.045696190399389
rs12136559	MAX	MA0058.3	T	G	3150	10.43	0.0486995237445159	0.0458818384416121
rs12136559	MYC	MYC_known5	T	G	8333.33	15.34	0.0483920797497816	0.0468075751509904
rs12136559	MAX	MAX__MYC_MA0059.1_JASPAR	T	G	38.24	4.78	0.0517376606574562	0.0457350986540778
rs12136559	MYC	MYC_known21	T	G	14000	15.39	0.051997865785091	0.0458926670132001
rs12136559	MNT	MA0825.1	T	G	736.84	8.11	0.0500604814682431	0.0460457849805826
rs12136559	USF1	USF1_USF1_DBD_HumanTF	T	G	74.42	8.22	0.046891092700181	0.0468745644637729
rs12136559	MYC	MA0147.1	T	G	137.5	6.91	0.0517088085993184	0.0496637597527007
rs12136559	MNT	MA0825.1	T	G	843.75	8.12	0.0479701830371716	0.0446637356182476
rs12136559	MYC	MYC_disc2	T	G	2812.5	15.43	0.0487098530347763	0.0478505745989064
rs12136559	MYC	MYC_known21	T	G	22307.69	15.38	0.0583387245792353	0.0475825345538189
rs12136559	MYC	MA0147.1	T	G	133.33	6.94	0.0498062344206894	0.0523567240220805
rs12136559	MNT	MNT_1	T	G	4473.68	15.37	0.0494400361660949	0.0459083080827484
rs12136559	MYC	MYC_known18	T	G	1878.79	15.3	0.0524402506587639	0.0494400361660949
rs12136559	MNT	MNT_MNT_DBD_HumanTF	T	G	736.84	8.11	0.0520454922227789	0.0460457849805826
rs12136559	MYC	MYC_known12	T	G	123.68	15.35	0.0550987731391624	0.0434710909846532
rs12136559	MAX	MA0058.3	T	G	4846.15	10.42	0.0524227284774942	0.0475825345538189
rs12136559	MAX	MA0058.3	T	G	166.67	6.14	0.065527471331003	0.0475825345538189
rs12136559	MNT	MNT_MNT_DBD_HumanTF	T	G	843.75	8.12	0.0477250697672687	0.0446637356182476
rs6657881	MAFF	MA0495.3	A	G	71.88	4.92	0.0469954499985583	0.0438787906303232
rs6657881	MAFK	MA0496.1	A	G	225.35	5.81	0.0568238195927476	0.0474899908212759
rs6657881	MAFF	MA0495.3	A	G	71.88	4.95	0.0457617432776667	0.0437740134698247
rs6657881	MAFK	MafK_MA0496.1_JASPAR	A	G	225.35	5.81	0.0469726095393371	0.0474899908212759
rs6657881	MAFK	MA0496.1	A	G	235.29	5.78	0.0486633699631116	0.0605740175483478
rs6657881	MAFF	MAFF_MAFF_HUMAN.H10MO.A	A	G	78.95	7.23	0.0480941195460298	0.0536995604952877
rs6657885	ZEB1	ZEB1_known4	C	A	2250	14.77	0.0468824073383172	0.0445453350774873
rs200417151	POU2F2	POU2F2_known5	T	C	204.82	15.02	0.0482566130505148	0.0521784244605508
rs78805055	POU2F2	POU2F2_known5	T	C	204.82	15.02	0.0482566130505148	0.0521784244605508
rs1549556	FOXP1	MA0481.3	T	C	1100	4.24	0.0485617436553182	0.0445133593544834
rs1549556	HNF1A	HNF1A_1	T	C	315.22	15.31	0.0482298351739263	0.0468439857198226
rs1549556	FOXA1	MA0148.2	T	C	82.05	6.25	0.0443076035966215	0.0430437207543249
rs1549556	FOXA1	MA0148.1	T	C	62.34	5.66	0.0441318008933105	0.0429768208691488
rs1549556	FOXA1	MA0148.2	T	C	78.31	6.23	0.0459896278630369	0.0447578440315939
rs1549556	HNF1A	MA0046.1	T	C	35.05	4.54	0.0545342266113807	0.0449761412652026
rs1549556	FOXA1	MA0148.4	T	C	112.5	4.29	0.0473974405455422	0.0440340531135169
rs1549556	HNF1A	HNF1A_1	T	C	311.83	15.3	0.0521824654940073	0.044505458666916
rs1549556	FOXA1	MA0148.1	T	C	57.83	5.65	0.0505207890047754	0.0489863573191014
rs1549556	HNF1A	MA0046.1	T	C	34.69	4.55	0.0436633333576265	0.0465751671290824
1:8443319:C:A	PAX5	PAX5_PAX5_DBD_HumanTF	A	C	51.06	6.37	0.0511203154123397	0.0479476219939304
1:8443319:C:A	PAX5	PAX5_known5	A	C	51.06	6.42	0.0478222352888758	0.0478116077686182
rs11121205	E2F4	MA0470.1	G	A	114.29	9.08	0.0557602107312543	0.0456541782873561
rs11121205	E2F1	MA0024.2	G	A	27.45	8.5	0.0828548234745288	0.0497136225015339
rs11121205	TBX3	M01615	A	G	364.86	4.8	0.0679810548085901	0.0481515611912826
rs11121205	TBX3	M01615	A	G	510.64	4.94	0.0460693298603481	0.0476534183728121
rs11121205	E2F4	MA0470.1	G	A	120	9.02	0.0492419014337612	0.0579881524859938
rs11121205	E2F1	E2F1_E2F1_HUMAN.H10MO.A	G	A	134.78	4.08	0.0487046884097656	0.0456368401140478
rs11121205	E2F4	MA0470.1	G	A	94.74	9.2	0.050267284145956	0.0477350930389584
rs11121205	E2F1	M01095	G	A	44.21	3.92	0.0464021914504196	0.0548599617758276
rs7544052	MAX	MAX_MAX_methyl_3_HT-SELEX2	A	T	100	10.9	0.0594263905504085	0.0476278851816844
rs7544052	MAX	MAX_MAX_methyl_3_HT-SELEX2	A	T	123.46	10.87	0.0511082980448207	0.0468541793052578
rs11121212	POU5F1	POU5F1_PO5F1_HUMAN.H10MO.A	T	C	75	3.32	0.0477212918597849	0.0433033523197944
rs11121212	POU5F1	POU5F1_disc1	T	C	8947.37	14.96	0.0481645473555836	0.0441295941591565
rs3750683	SP2	MA0516.1	C	T	333.33	8.74	0.0451405907313105	0.0437172350673068
rs3750683	SP2	M01581	C	T	80	6.24	0.0491048695867096	0.0528154517076152
rs3750683	SP2	Sp2_MA0516.1_JASPAR	C	T	294.12	8.76	0.0545321510575888	0.0482291268589917
rs3750683	SP1	SP1_MA0079.3_JASPAR	C	T	172.84	10.4	0.0461366139322594	0.0486847170584684
rs3750683	SP1	SP1_MA0079.3_JASPAR	C	T	177.22	10.38	0.0499115481108545	0.0436856125251722
rs3750683	SP1	MA0079.3	C	T	177.22	10.38	0.0457074616636272	0.0436856125251722
rs3750683	SP1	SP1_known4	C	T	1264.37	15.28	0.0734678925198061	0.049536389925212
rs3750683	SP2	MA0516.1	C	T	294.12	8.76	0.0453233030296101	0.0482291268589917
rs3750683	SP2	Sp2_MA0516.1_JASPAR	C	T	333.33	8.74	0.0447516252135703	0.0437172350673068
rs3750683	SP1	MA0079.3	C	T	172.84	10.4	0.0579241337231936	0.0486847170584684
rs7948028	SIN3A	SIN3A_disc6	C	A	1843.75	14.75	0.0458410510051863	0.043534505553881
rs7948028	POU2F2	POU2F2_disc2	C	A	690	14.64	0.058018914675402	0.0474298034653367
rs7948028	SIN3A	SIN3A_disc6	C	A	931.51	14.86	0.0461833446360999	0.0485457197250879
rs7948028	SIN3A	SIN3A_disc6	C	A	840.91	14.8	0.061298423023282	0.0435603730631014
rs4482060	RXRA	MA0512.1	A	T	183.33	9.96	0.0478682861167223	0.0556579601797992
rs4482060	RXRA	M01541	A	T	400	4.83	0.050783865599165	0.0491070904125408
rs4482060	NR2F1	NR2F1_COT1_HUMAN.H10MO.B	A	T	136.84	4.5	0.0710968676461266	0.0464459704418527
rs4482060	NR2F6	NR2F6_M1434_1.02_CISBP	A	T	2571.43	5.56	0.0459827671697285	0.0489886355374314
rs4482060	NR2F1	NR2F1_NR2F1_DBD_3_HumanTF	A	T	44.68	11.03	0.0480941195460298	0.0996731255987991
rs10750025	PRDM1	PRDM1_disc1	C	T	341.18	15.28	0.0471676306298158	0.04339585307436
rs10750025	MYC	MYC_known12	C	T	116.22	15.28	0.0603226193467051	0.0470346472635827
rs897605	REST	REST_disc6	C	T	47.5	15.42	0.0484892352805053	0.051014375011306
rs897605	REST	REST_disc6	C	T	54.29	15.39	0.0686436035301837	0.0435324048942338
rs731384	YY1	YY1_known5	A	G	3818.18	14.96	0.0469885979257844	0.0536924760784971
rs731384	YY1	YY1_known5	A	G	3782.61	14.98	0.0453027555511285	0.0503921128735644
rs2081361	EBF1	EBF1_known3	C	T	554.35	15.19	0.0486478748842062	0.047981463296675
rs2081361	EBF1	EBF1_known3	C	T	552.94	15.25	0.0483830186567927	0.0497134290716829
rs2081361	EBF1	EBF1_known3	C	T	1515.15	15.19	0.0725292965093911	0.0481260876414028
rs2081361	EBF1	MA0154.1	C	T	151.9	4.6	0.0505331963266573	0.0490123282725116
rs2081361	EBF1	MA0154.1	C	T	153.85	4.61	0.0549364159639772	0.0488528378239608
rs2081361	EBF1	MA0154.1	C	T	134.15	4.64	0.0589393112818713	0.0484505609835399
rs2081361	EBF1	MA0154.1	C	T	480	4.66	0.0520613666593884	0.0467414641226126
rs2081361	EBF1	EBF1_known3	C	T	585.37	15.23	0.0566736189305554	0.0474083962093656
rs499188	HNF1A	HNF1A_3	A	C	123.53	5.9	0.0543350898296981	0.0460392446377486
rs12146541	E2F4	E2F4_E2F4_HUMAN.H10MO.A	G	C	44.44	4.64	0.0481140997733255	0.0545134706003081
rs12146541	E2F1	E2F1_E2F1_HUMAN.H10MO.A	G	C	85.71	4.74	0.0604901599781357	0.0455812325875892
rs12146541	E2F1	MA0024.1	G	C	28.8	3.87	0.0447343566294127	0.0472096720060208
rs12146541	E2F1	E2F1_MA0024.1_JASPAR	G	C	28.8	3.87	0.0466167759867249	0.0472096720060208
rs12146541	NEUROD1	NEUROD1_NDF1_HUMAN.H10MO.C	G	C	48.15	2.81	0.0483784880656408	0.0627052732142746
rs12146541	E2F1	E2F1_E2F1_HUMAN.H10MO.A	G	C	82.14	4.86	0.0659234115777963	0.0456368401140478
rs12146541	E2F1	MA0024.2	G	C	24.68	8.57	0.101933383950751	0.0497136225015339
rs12146541	E2F4	E2F4_E2F4_HUMAN.H10MO.A	G	C	46.15	4.76	0.0496343021472455	0.0500841189105478
rs11605731	STAT5A	STAT5A_M3985_1.02_CISBP	C	G	393.62	5.6	0.0502662641506147	0.0464661416702391
rs11605731	STAT3	MA0144.2	C	G	285.71	11.24	0.0461875074588591	0.0457275663789442
rs11605731	STAT3	MA0144.2	C	G	273.33	11.25	0.0496416666848746	0.0441202428216524
rs11605731	STAT3	MA0144.2	C	G	300	11.17	0.0462489477221551	0.0491465013991146
rs11605731	STAT5A	STAT5A_M3985_1.02_CISBP	C	G	444.44	5.67	0.0467304547567408	0.0471955045015797
rs11605731	STAT5A	STAT5A_M3985_1.02_CISBP	C	G	455.56	5.68	0.0492419014337612	0.0464852161024188
rs17455520	CREB1	CREB1_MA0018.3_JASPAR	A	C	41.18	4.7	0.0500604814682431	0.0440971876360942
rs17455520	CREB1	MA0018.3	A	C	41.18	4.7	0.0543171201373733	0.0440971876360942
rs17455520	ATF2	ATF2_MA1632.1_JASPAR	A	C	45.83	5.55	0.0475919992542309	0.0440870022884161
rs17455520	ATF2	MA1632.1	A	C	45.83	5.55	0.0531198724578477	0.0440870022884161
rs11570190	SRF	SRF_SRF_2_HT-SELEX2	C	A	222.22	9.28	0.0589883666691242	0.0449900350872475
rs11570190	SRF	SRF_SRF_2_HT-SELEX2	C	A	224.14	9.37	0.0524277976663979	0.0439011320331832
rs34582634	SP1	SP1_known7	A	G	1047.62	13.05	0.0455850268712393	0.0473075946268208
rs12808303	RFX5	RFX5_RFX5_HUMAN.H10MO.A	C	G	64.52	4.4	0.0516799548619903	0.0453394758577785
rs7935551	EP300	EP300_disc5	A	G	933.33	14.9	0.0451936980926595	0.0662559076103135
rs7935551	EP300	EP300_disc5	A	G	1000	14.91	0.048277872936716	0.0849949197471706
rs12364730	ETS1	MA0098.2	T	C	310.53	9.25	0.0512848287809559	0.0431278114180878
rs12364730	ETS1	MA0098.2	T	C	376.47	9.22	0.0488485368405355	0.0435664723461925
rs12364730	GABPA	MA0062.3	T	C	35.16	4.11	0.0467186517157458	0.0463054073030032
rs12364730	GABPA	MA0062.3	T	C	32.22	4.08	0.0489314332921061	0.0507658733798549
rs12364730	GABPA	MA0062.3	T	C	35.87	4.09	0.0528683717925502	0.0491489669113795
rs12364730	ETS1	MA0098.2	T	C	393.75	9.19	0.050392854373666	0.0442070605129147
rs11227199	EBF1	EBF1_disc2	G	A	89.74	14.99	0.0471077211521349	0.0759849231607358
rs10896006	MAFK	M01333	G	A	161.54	7.31	0.0512483702667941	0.0459673283276384
rs34527830	GABPA	MA0062.3	A	G	32	4.25	0.0489314332921061	0.0507658733798549
rs34527830	ETV4	ETV4_ETV4_HUMAN.H10MO.B	A	G	305.88	4.9	0.0654885948945259	0.0478480818327084
rs35826299	CEBPB	CEBPB_known3	C	T	7042.25	15.23	0.0474642751164922	0.0522675908960323
rs35826299	POU2F2	POU2F2_known12	T	C	6875	14.65	0.0520849076030579	0.0442979661695742
rs7128776	REST	REST_disc9	C	T	1076.92	14.81	0.0491612785848612	0.0710268256020115
rs11227202	TBX3	TBX3_TBX3_methyl_1_HT-SELEX2	G	A	212.2	10.99	0.0493853419893333	0.0780684686059166
rs10896010	EBF1	EBF1_disc2	C	A	500	14.2	0.0451359519387902	0.0465828028293274
rs10896010	BHLHE40	BHLHE40_disc2	C	A	2000	14.29	0.0479417933986778	0.0486334971145311
rs10896010	EBF1	EBF1_disc2	C	A	644.44	14.22	0.0442906494687507	0.0433092186403041
rs10896010	BHLHE40	BHLHE40_disc2	C	A	1648.15	14.27	0.0482853785700977	0.0459330046794266
rs17146964	TEAD4	MA0809.1	A	G	256.41	8.54	0.0722173862313328	0.0476948673672368
rs17146964	TEAD4	TEAD4_1	A	G	1538.46	15.41	0.0473833317398556	0.0476348128849075
rs17146964	TEAD4	TEAD4_TEAD4_DBD_HumanTF	A	G	256.41	8.54	0.088858393194493	0.0476948673672368
rs17146964	TEAD4	M01622	A	G	43.81	4.22	0.0568304203977151	0.0458194234833563
rs115065992	POU2F2	POU2F2_known13	A	T	83.75	5.67	0.0476598846006533	0.0444950808259392
rs11227205	EGR1	MA0162.1	G	A	52	4.09	0.0496840110121196	0.0435652313615182
rs11227205	EGR1	MA0162.1	G	A	50	4.07	0.0481220917077623	0.04470537889862
rs11227205	TCF3	TCF3_TFE2_HUMAN.H10MO.C	A	G	84.21	6.23	0.0856627521873021	0.0488064754853166
rs11227205	EGR1	MA0162.1	G	A	43.75	4.11	0.0521605700314358	0.0450544389000629
rs11227205	EGR1	MA0162.1	G	A	55	4.17	0.0494707994877498	0.0453174383754699
rs11227205	EGR1	EGR1_known5	G	A	179.17	15.19	0.0526544962868719	0.0483830186567927
rs11227205	TCF3	TCF3_TFE2_HUMAN.H10MO.C	A	G	88.89	6.17	0.0473833317398556	0.0497994784907811
rs11227205	EGR1	EGR1_known5	G	A	170.83	15.17	0.0615389645669494	0.0476805972850383
rs3200401	NR3C1	MA0113.2	C	T	66.67	7.63	0.0610845206712182	0.0446739129272801
rs3200401	NR3C1	NR3C1_known14	C	T	56.41	15.21	0.047494882155863	0.0533930650495563
rs3200401	NR3C1	MA0113.2	C	T	84.62	7.52	0.0610845206712182	0.0446739129272801
rs3200401	SMAD1	M01552	C	T	43.33	3.62	0.0511773941121516	0.0498835195117561
rs3200401	SMAD1	M01552	C	T	42.39	3.61	0.0687781051252739	0.0496524590496021
rs11227217	RAD21	RAD21_disc6	C	T	311.11	14.87	0.062437339335621	0.0471430138446971
rs11227217	ELF1	ELF1_disc3	C	T	63333.33	14.47	0.0432708817232224	0.0435506044631323
rs11227217	ELF1	ELF1_disc3	C	T	31147.54	14.46	0.0449028619337095	0.0454157679026548
rs11227217	RAD21	RAD21_disc6	C	T	355.56	14.85	0.0485246146384404	0.0570723247043824
rs11227217	ELF1	ELF1_disc3	C	T	66666.66	14.53	0.0436670756203573	0.0438108246034776
rs11227217	ELF1	ELF1_disc3	C	T	23595.5	14.44	0.0447219267828594	0.0471373823799704
rs11227217	RAD21	RAD21_disc6	C	T	737.5	14.94	0.0519858816095552	0.0451097050067622
rs11227217	RAD21	RAD21_disc6	C	T	329.41	14.88	0.0465866018834867	0.0493064691107116
rs1346	CEBPB	CEBPB_known2	T	A	4285.71	15.34	0.046890375606465	0.0781039130710706
11:70682163:C:G	SP2	Sp2_MA0516.1_JASPAR	G	C	62.07	8.57	0.0485569100054119	0.070427150152248
11:70682163:C:G	SP2	M01580	G	C	41.67	4.15	0.0460745619803341	0.0507980652554156
rs11602121	PRDM1	PRDM1_disc2	C	T	1840	15.24	0.0541283915133437	0.0458674001699813
rs11602121	BACH1	BACH1_1	C	T	230.77	15.34	0.0500604814682431	0.0454365460306674
rs11602121	PAX5	PAX5_disc2	C	T	541.67	14.1	0.0482438568090893	0.050490528819445
rs11602121	BACH1	BACH1_1	C	T	222.22	15.31	0.05324689464232	0.0446395499596961
rs11602121	BACH1	BACH1_1	C	T	166.67	15.24	0.0567181904180913	0.0466178341851768
rs11602121	PRDM1	PRDM1_disc2	C	T	2043.48	15.31	0.0493853419893333	0.0447950712611709
rs11602121	PAX5	PAX5_disc2	C	T	541.67	14.09	0.0484283229284362	0.0464981021387134
rs11602121	PRDM1	PRDM1_disc2	C	T	6575.34	15.34	0.0515500923613569	0.0472118687652576
rs11607833	CEBPB	CEBPB_disc1	A	C	158.14	14.96	0.0491656036228711	0.0917492696923477
rs4753210	POU5F1	POU5F1_POU5F1_methyl_3_HT-SELEX2	G	C	72.09	9.63	0.0542362468991769	0.0459940543478797
rs494632	ZNF24	MA1124.1	T	C	21.48	3.58	0.0495532862597603	0.0816606025812486
rs3883901	CBFB	CBFB_PEBB_HUMAN.H10MO.C	T	C	125	4.44	0.0458910506617546	0.0466663322541316
rs2062507	TCF7	TCF7_MA0769.2_JASPAR	T	C	80	5.63	0.0505004360495971	0.0428007290449216
rs2062507	TCF7	MA0769.2	T	C	80	5.63	0.0477228922902429	0.0428007290449216
rs2062507	TCF7	TCF7_TCF7_2_HT-SELEX2	T	C	215.69	8.56	0.0488528378239608	0.0452342356699402
rs2062507	TCF7L2	TCF7L2_TF7L2_HUMAN.H10MO.A	T	C	122.73	7.66	0.0575324195422079	0.0486292700389888
rs661647	MYNN	MYNN_UN0132.1_JASPAR	T	C	46.36	5.09	0.0467898008257537	0.0479096601607313
rs11065293	TCF3	TCF3_TCF3_DBD_HumanTF	T	C	217.24	10.04	0.0489025751259048	0.0524831587237744
rs11065293	TCF3	TCF3_7	T	C	689.66	14.89	0.0471803006894564	0.0525975198068614
rs11065293	ZEB1	M01676	T	C	96.7	4.19	0.0485569100054119	0.0684287905084185
rs11065307	POU2F2	POU2F2_disc2	C	T	4235.29	14.63	0.0462192252045308	0.0478206921243137
rs11065307	EGR1	EGR1_disc6	C	T	2686.57	14.36	0.0461866573942602	0.04702321459668
rs11065307	ELF1	ELF1_disc3	C	T	8e+05	14.96	0.0436670756203573	0.0430615900041049
rs58918988	RXRA	M01541	A	G	50	5.09	0.0482651170824907	0.0751479624102598
rs1151849	TCF7L2	TCF7L2_known1	G	A	226.42	15.15	0.0542092856619831	0.0489175520888486
rs7966446	YY1	YY1_disc5	C	T	1562.5	14.3	0.04958198887932	0.0545894155126239
rs7966446	YY1	YY1_disc5	C	T	1500	14.29	0.0553067984087507	0.04648884197581
rs7966446	EP300	EP300_disc9	C	T	653.85	14.01	0.0562328936870127	0.0489322775275646
rs1718188	ZEB1	ZEB1_known3	A	T	100	14.94	0.0477250697672687	0.0451180592901345
rs7969196	NR3C1	NR3C1_known14	T	G	40.82	14.33	0.047494882155863	0.0676739538364812
rs12579014	PAX5	PAX5_disc4	G	T	1130.43	14.92	0.0463562250813567	0.0427719029126785
rs9545372	MAFK	MafK_MA0496.1_JASPAR	A	G	653.33	5.81	0.0469726095393371	0.0435003245930383
rs9545372	MAFF	MAFF_MAFF_HUMAN.H10MO.A	A	G	521.74	7.23	0.0480941195460298	0.0453694429731764
rs9545372	MAFK	MA0496.1	A	G	653.33	5.81	0.0513154214695276	0.0435003245930383
rs9545372	MAFF	MA0495.3	A	G	50.53	4.95	0.050251729662782	0.0483548671059002
rs9545372	MAFK	MAFK_MAFK_HUMAN.H10MO.A	A	G	152.94	5.51	0.0461989117115764	0.0439847129143675
rs9545372	MAFF	MafF_MA0495.1_JASPAR	A	G	251.72	5.45	0.0474829536282175	0.0646382644174043
rs912330	BHLHE40	BHLHE40_disc2	C	T	2325.58	14.5	0.0464231956648312	0.0457320723551066
rs912330	BHLHE40	BHLHE40_disc2	C	T	2200	14.46	0.0442286155329915	0.0451733872208597
rs9554474	HSF1	MA0486.1	G	A	100	6.82	0.0490656337137352	0.0548734427726301
rs9556962	BACH1	BACH1_1	C	T	1964.29	15.25	0.05324689464232	0.0446395499596961
rs9556962	BACH1	BACH1_1	C	T	1100	15.19	0.0479739431431115	0.045634868828162
rs9556962	BACH1	BACH1_1	C	T	1641.79	15.23	0.0567181904180913	0.0466178341851768
rs9556963	RXRA	M01541	A	G	200	4.97	0.0482651170824907	0.0505481015032498
rs9556963	RXRA	MA0512.1	A	G	150	9.58	0.0478682861167223	0.0556579601797992
rs4772097	TCF7L2	TCF7L2_known6	A	C	109.09	7.23	0.0433549325734321	0.043158038466244
rs4772097	TCF7L2	TCF7L2_known6	A	C	108.33	7.19	0.0437742413020905	0.0424590429075121
rs4772097	TCF7L2	TCF7L2_known5	A	C	59.09	7.6	0.0481203689538027	0.0437342024462856
rs4772097	TCF7L2	TCF7L2_TF7L2_HUMAN.H10MO.A	A	C	525	7.94	0.0431977120709386	0.0424159789852149
rs4772097	TCF7L2	TCF7L2_known5	A	C	60.87	7.56	0.0537358786635498	0.0443361783721635
rs4772097	TCF7L2	TCF7L2_TF7L2_HUMAN.H10MO.A	A	C	456.52	7.93	0.0452238142069988	0.0424532307446022
rs9556969	RXRA	RXRA_known3	T	C	293.75	15.03	0.0532900319236823	0.0457682872311976
rs1107379	NANOG	NANOG_disc4	T	C	266.67	15.04	0.0470827728707077	0.0701509126817456
rs9556972	RUNX3	RUNX3_RUNX3_HUMAN.H10MO.C	C	T	111.11	7.58	0.0491171799922072	0.0507886016556888
rs9556972	RUNX3	RUNX3_RUNX3_HUMAN.H10MO.C	C	T	111.76	7.66	0.050553400561496	0.0476488607116489
rs9556972	RUNX3	M01539	C	T	100	6.15	0.0557174518344496	0.0499674682667988
rs9556972	RUNX3	M01539	C	T	91.67	6.21	0.050463718496785	0.045677068168769
rs4771307	NFIC	M01392	G	A	119.64	7.68	0.04813407944147	0.0729953200228743
rs55825782	TBP	TBP_UP00029A_1_UniPROBE	T	C	265.96	5.97	0.0499712459245271	0.0558505652776117
rs55825782	NR3C1	MA0113.1	C	T	27.69	3.51	0.0487253466681325	0.0539826608689892
rs55810038	MEF2A	M01342	A	T	118.18	6.49	0.0459936963927977	0.0471152052065642
rs55810038	FOXP1	M01176	A	T	176.47	7.37	0.0448430094209938	0.0456410212583017
rs1950834	ELK1	MA0028.1	G	A	412.5	2.56	0.0472573077928763	0.052352633223707
rs61990288	RXRA	RXRA_disc4	A	G	454.55	3.43	0.0489430702130799	0.0583083732700908
rs61990288	SMAD1	M01552	G	A	46.15	3.36	0.0507696508405773	0.0470883888977238
rs1111177	PRDM1	PRDM1_disc1	G	A	193.75	15.27	0.0471676306298158	0.04339585307436
rs1950835	STAT3	MA0144.2	T	G	141.67	11.04	0.0496416666848746	0.0535992928422206
rs1950836	EGR1	EGR1_disc7	C	T	7454.55	15.32	0.0452702365392793	0.0441508081127699
rs1950836	HDAC2	HDAC2_disc4	C	T	8378.38	15.42	0.0485520763208834	0.0498141832850511
rs1950836	NFE2	NFE2_disc3	C	T	154.93	15.06	0.0455003106240858	0.0482026555150616
rs1950836	HDAC2	HDAC2_disc4	C	T	8611.11	15.44	0.049619572799858	0.0506627058308989
rs1950836	EGR1	EGR1_disc7	C	T	7454.55	15.34	0.050026097992991	0.0456572164303837
rs1950836	SETDB1	SETDB1_disc2	C	T	3010.75	15.41	0.0467993115465568	0.0464647403139103
rs8007820	TEAD4	TEAD4_TEAD4_DBD_HumanTF	A	G	289.47	8.78	0.0660802694857343	0.0476223643793317
rs8007820	TEAD4	MA0809.1	A	G	289.47	8.78	0.0524577721855985	0.0476223643793317
rs8007820	TEAD4	TEAD4_1	A	G	1578.95	15.47	0.0605184255378746	0.0491383588503932
rs8007820	TEAD4	TEAD4_TEAD4_DBD_HumanTF	A	G	289.47	8.78	0.0576027789192466	0.0457759978770948
rs8007820	TEAD4	M01622	A	G	70.77	4.42	0.0471422899225087	0.043766467262813
rs8007820	TEAD4	MA0809.1	A	G	289.47	8.78	0.0707992558191343	0.0457759978770948
rs8007820	TEAD4	TEAD4_TEAD4_HUMAN.H10MO.A	A	G	188.89	6.46	0.0508279169169581	0.0443346396363681
rs8007820	TEAD4	TEAD4_TEAD4_HUMAN.H10MO.A	A	G	170	6.47	0.0462643064191519	0.0472374348273549
rs8007820	TEAD4	TEAD4_1	A	G	1578.95	15.47	0.0659472474352814	0.0480086187583078
rs7146847	NR3C1	MA0113.1	C	G	45	2.63	0.0516366711154465	0.0466403302969894
rs7146847	NR3C1	NR3C1_known14	C	G	6000	14.17	0.0461297884576411	0.0443550957690747
rs7146847	NR3C1	MA0113.1	C	G	50	2.64	0.0487253466681325	0.0495577510509813
rs7146847	NR3C1	NR3C1_known14	C	G	6666.67	14.16	0.0486840295075751	0.0455500750823724
rs7149112	SP1	MA0079.1	C	A	94.74	3.63	0.0450363636148776	0.054877971443481
rs7149112	MYC	MYC_disc3	A	C	1181.82	15.04	0.0592857162221968	0.0467542880980279
rs7149112	MYC	MYC_disc3	A	C	6666.67	15.11	0.0742367532541525	0.0487754611462746
rs7149112	SP1	SP1_MA0079.1_JASPAR	C	A	81.25	3.56	0.0692802827621088	0.0463231811551095
rs7149112	SP1	MA0079.1	C	A	81.25	3.56	0.0522822187976542	0.0463231811551095
rs7149112	MYC	MYC_disc3	A	C	1558.44	15.09	0.050783865599165	0.0474715712931638
rs1255992	ZEB1	ZEB1_known3	G	A	100	15.27	0.0477250697672687	0.0451180592901345
rs1152601	ETV4	ETV4_1	C	T	176.92	14.93	0.0488638908867096	0.0667573820204664
rs1152601	TCF7L2	TCF7L2_TF7L2_HUMAN.H10MO.A	T	C	118.18	8.07	0.0472489384130829	0.0534702631565303
rs1152601	SPI1	MA0080.5	C	T	27.08	3.9	0.0470659398712346	0.0732398804475184
rs1152601	PRDM1	MA0508.3	T	C	44	5.25	0.0457570858221416	0.0546995479938976
rs1152601	SPI1	MA0080.3	C	T	105.26	12.44	0.0496269375188843	0.0969088228424385
rs1152601	PRDM1	MA0508.2	T	C	58.33	7.14	0.0608419074346347	0.0455845789907949
rs1152601	PRDM1	MA0508.1	T	C	132.14	9.65	0.119206123631354	0.0499036005710651
rs1152601	TCF7L2	TCF7L2_TF7L2_HUMAN.H10MO.A	T	C	112.79	8.06	0.0517959186241086	0.0492048381202512
rs1152601	PRDM1	PRDM1_MA0508.2_JASPAR	T	C	58.33	7.14	0.0458075004279488	0.0455845789907949
rs1152594	FOXM1	FOXM1_1	A	G	774.19	14.88	0.0536027430072561	0.0471155258928791
rs1152594	FOXM1	FOXM1_1	A	G	1132.35	14.96	0.0461175024840199	0.043380803778288
rs1152594	FOXM1	FOXM1_1	A	G	787.23	14.86	0.0483766454991099	0.0447494666524064
rs1152594	FOXM1	FOXM1_1	A	G	1115.94	14.96	0.0536485366760022	0.0448686009379476
rs1256065	NR3C1	NR3C1_known10	G	T	2565.22	15.25	0.0459865295764281	0.0483263841333328
rs1256065	NR3C1	NR3C1_known8	G	T	10000	15.25	0.0480701111917045	0.0471559106500158
rs1256065	NR3C1	NR3C1_known8	G	T	6421.05	15.15	0.0485088246138091	0.0543183836568182
rs944047	PBX3	PBX3_known1	C	T	4512.19	15.16	0.0478647438471292	0.0497823233242767
rs944047	PBX3	PBX3_known1	C	T	4880.95	15.17	0.045883977324346	0.046782997907753
rs944047	PBX3	PBX3_known1	C	T	4021.74	15.17	0.0448965687656031	0.0434155645308485
rs1256033	ATF3	ATF3_ATF3_HUMAN.H10MO.A	T	C	444.44	5.37	0.0605184255378746	0.0474829536282175
rs1256033	ATF1	M01020	T	C	73.53	5.18	0.0646885266257347	0.0461632729781551
rs1256033	PRDM1	MA0508.2	T	C	60.87	5.54	0.0608419074346347	0.0435607138274196
rs1256033	PRDM1	PRDM1_MA0508.2_JASPAR	T	C	60.87	5.54	0.0458075004279488	0.0435607138274196
rs1256033	ATF1	ATF1_ATF1_HUMAN.H10MO.B	T	C	487.5	7.64	0.0527453407018132	0.0436413663298583
rs1256033	ATF3	ATF3_ATF3_HUMAN.H10MO.A	T	C	920	5.58	0.0482608650794094	0.0467765862297373
rs1256033	PRDM1	MA0508.2	T	C	68.42	5.36	0.0462523897551545	0.0497063070556708
rs1256033	ATF3	ATF3_ATF3_HUMAN.H10MO.A	T	C	901.96	5.52	0.0458152642933559	0.0440835801168318
rs1256033	ATF1	ATF1_ATF1_HUMAN.H10MO.B	T	C	564.29	7.71	0.0591385387192043	0.0448618810838808
rs1256033	PRDM1	PRDM1_MA0508.2_JASPAR	T	C	68.42	5.36	0.0511954176587324	0.0497063070556708
rs1256033	ATF1	M01020	T	C	62.82	5.11	0.0474059057080333	0.0446615369391159
rs1256030	MYC	MYC_disc9	G	A	965.52	14.4	0.0451458921870893	0.0567798076208551
rs1256113	ZEB1	M01676	C	G	183.33	5.27	0.0498618742074461	0.0564810983065036
rs1256113	ZEB1	ZEB1_ZEB1_HUMAN.H10MO.B	C	G	419.05	7.44	0.0517376606574562	0.0486691072028997
rs1256113	TBX3	M01615	C	G	518.52	7.27	0.0460693298603481	0.0468627571548713
rs1256113	TBX3	M01615	C	G	531.25	7.22	0.0492482591642013	0.0481515611912826
rs1256113	ZEB1	M01676	C	G	183.33	5.28	0.0492355436384724	0.0502925559701151
rs1256113	ZEB1	M01676	C	G	219.78	5.37	0.0485569100054119	0.0610145850955894
rs1256113	ZEB1	ZEB1_ZEB1_HUMAN.H10MO.B	C	G	422.22	7.48	0.0456614808868847	0.0442682346746552
rs1256113	ZEB1	M01676	C	G	212.77	5.39	0.0484237926356925	0.0728850088201219
rs1256099	ATF2	ATF2_MA1632.1_JASPAR	A	C	51.58	5.44	0.0476983403909567	0.0475601849230882
rs1256099	ATF2	MA1632.1	A	C	51.58	5.44	0.0468075751509904	0.0475601849230882
rs1256099	ATF2	MA1632.1	A	C	48.75	5.4	0.0531198724578477	0.0440870022884161
rs1256099	ATF2	ATF2_MA1632.1_JASPAR	A	C	48.75	5.4	0.0475919992542309	0.0440870022884161
rs1256099	ATF2	ATF2_ATF2_HUMAN.H10MO.B	A	C	78.05	6.21	0.0686738727528305	0.047382626292966
rs79196770	SP1	SP1_MA0079.1_JASPAR	T	G	155.32	3.52	0.0513607699708905	0.0447066354376875
rs79196770	SP1	MA0079.2	G	T	59.62	4.79	0.0472893808614462	0.0549026500464611
rs79196770	SP1	SP1_MA0079.1_JASPAR	T	G	151.67	3.54	0.0478758133831477	0.0447597007597295
rs79196770	EGR1	EGR1_disc6	G	T	1246.58	6.92	0.0524458803774779	0.049927295692666
rs79196770	SP1	SP1_known1	T	G	1369.86	14.91	0.049495991337199	0.046649981233269
rs79196770	SP1	MA0079.1	T	G	151.67	3.54	0.0475931523767299	0.0447597007597295
rs79196770	SP1	MA0079.1	T	G	130	3.5	0.0450363636148776	0.054877971443481
rs79196770	SP1	MA0079.2	G	T	53.75	4.84	0.0646885266257347	0.0470666282114899
rs79196770	SP1	SP1_known1	T	G	1122.45	14.93	0.0543490657183588	0.0480419295885915
rs79196770	SP1	SP1_known7	G	T	436.62	15.09	0.0853269143474963	0.0483123413731203
rs79196770	SP1	MA0079.1	T	G	155.32	3.52	0.0467052466364584	0.0447066354376875
rs12434356	MAFF	MAFF_MAFF_methyl_5_HT-SELEX2	C	A	233.33	10.94	0.0573849260682335	0.0490597111071795
rs12434356	MAFF	MAFF_MAFF_methyl_1_HT-SELEX2	C	A	284.21	10.45	0.05601966953747	0.0470923915742651
rs12434356	BACH1	BACH1_BACH1_HUMAN.H10MO.A	C	A	57.78	5.89	0.0481021117039538	0.0452259298350025
rs12434356	HNF4A	MA0114.2	A	C	265.06	11.22	0.0456992643922486	0.0436136985959436
rs12434356	MAFK	M01332	C	A	58.33	7.65	0.0522825275616246	0.0461818052823306
rs12434356	HNF4A	HNF4A_MA0114.2_JASPAR	A	C	265.06	11.22	0.0513452616291302	0.0436136985959436
rs12434356	HNF4A	HNF4A_MA0114.2_JASPAR	A	C	296.88	11.17	0.0543500639780726	0.045621783318002
rs12434356	BACH1	M01029	C	A	57.78	5.87	0.0464613276382644	0.0466997262734463
rs12434356	BACH1	M01029	C	A	57.78	5.89	0.0485424088480399	0.0452259298350025
rs12434356	MAFF	MAFF_MAFF_7_HT-SELEX2	C	A	68.42	5.52	0.0503324875982325	0.0458747386067468
rs12434356	MAFF	MAFF_MAFF_methyl_1_HT-SELEX2	C	A	300	10.44	0.0579229754347936	0.0486772243735188
rs12434356	HNF4A	MA0114.2	A	C	275.36	11.13	0.0599455723560392	0.0488418606158487
rs12434356	MAFF	MAFF_MAFF_3_HT-SELEX2	C	A	40	4.44	0.0630815416435734	0.0482736210111578
rs12434356	MAFF	MAFF_MAFF_methyl_5_HT-SELEX2	C	A	200	10.9	0.0482736210111578	0.0456957223948879
rs12434356	MAFF	MAFF_MAFF_3_HT-SELEX2	C	A	40	4.35	0.0686954201954411	0.0455217618189039
rs12434356	BACH1	BACH1_BACH1_HUMAN.H10MO.A	C	A	57.78	5.87	0.0494878895498846	0.0466997262734463
rs12434356	MAFF	MAFF_MAFF_methyl_5_HT-SELEX2	C	A	225	10.92	0.0490478657286677	0.0503778926479088
rs12434356	MAFF	MAFF_MAFF_3_HT-SELEX2	C	A	35	3.97	0.0686954201954411	0.0455217618189039
rs12434356	MAFF	MAFF_MAFF_methyl_1_HT-SELEX2	C	A	278.95	10.39	0.0478647438471292	0.0452753794320703
rs12434356	MAFF	MAFF_MAFF_methyl_5_HT-SELEX2	C	A	109.26	10.82	0.0482736210111578	0.0456957223948879
rs12434356	HNF4A	HNF4A_MA0114.2_JASPAR	A	C	275.36	11.13	0.0575579378899973	0.0488418606158487
rs12434356	HNF4A	MA0114.2	A	C	296.88	11.17	0.0470659398712346	0.045621783318002
rs2302832	SPI1	SPI1_disc1	C	T	171.15	15	0.0490478657286677	0.0757249510306661
rs4903266	CREB1	MA0018.1	C	G	32.33	4.4	0.061281125304962	0.0485647646689193
rs4903266	CREB1	MA0018.1	C	G	30.3	4.4	0.0502765993895613	0.0467972456331727
rs4903266	CREB1	CREB1_MA0018.1_JASPAR	C	G	32.33	4.4	0.0560878965594081	0.0485647646689193
rs4903266	CREB1	CREB1_MA0018.1_JASPAR	C	G	30.3	4.4	0.0786780195855867	0.0467972456331727
rs2230237	SPI1	SPI1_disc3	G	A	1500	14.29	0.045825246321648	0.0461121471791893
rs2230237	SPI1	SPI1_disc3	G	A	1833.33	14.47	0.0445445122033926	0.0447533774304004
rs2230237	SPI1	SPI1_disc3	G	A	1222.22	14.47	0.0449917768276267	0.0466614198876637
rs4903267	SP1	SP1_known7	T	G	500	13.28	0.0494537089453056	0.0597664495505542
rs4903267	SP1	SP1_disc3	T	G	815.38	13.29	0.04876601572682	0.0536332443704364
rs4903267	SP1	SP1_known7	T	G	575	13.36	0.0455850268712393	0.0493408820311463
rs8014289	SIN3A	SIN3A_disc6	G	A	315	14.94	0.0572630507499256	0.048802986192204
rs8014289	SIN3A	SIN3A_disc6	G	A	331.58	14.94	0.0605899612841834	0.0455321467502452
rs6493274	NANOG	NANOG_disc4	A	C	457.14	15.24	0.0451180589545627	0.0472381034754906
rs6493274	NANOG	NANOG_disc4	A	C	525	15.23	0.0470827728707077	0.0528485803569199
rs6493275	STAT5A	STAT5A_STA5A_HUMAN.H10MO.B	A	T	90	6.46	0.0473720445142291	0.0494512382274346
rs6493275	STAT5A	STAT5A_STA5A_HUMAN.H10MO.B	A	T	85	6.42	0.0459431988418024	0.0499118501152236
rs6493275	STAT5A	STAT5A_STA5A_HUMAN.H10MO.B	A	T	87.5	6.47	0.0498698223164384	0.0620223277695075
rs8040226	NR3C1	NR3C1_known7	G	A	1882.35	15.3	0.0488694173476758	0.0627064127631847
rs7184673	USF2	USF2	G	A	40.74	3.65	0.0500432899882116	0.0474175519715898
rs1317727	TBP	TBP_UP00029A_1_UniPROBE	A	C	410.26	5.89	0.046222159176975	0.0471923059867302
rs1317727	MEF2A	MEF2A_MEF2A_HUMAN.H10MO.A	A	C	96	7.72	0.0657787888665478	0.0499059266373215
rs34367582	SP4	M01583	C	G	69.23	5.28	0.048632379445551	0.0467703997713436
rs34367582	SP4	M01583	C	G	53.19	5.16	0.0479401014911392	0.0575406168050211
rs35029919	ZNF24	MA1124.1	A	C	25	5.06	0.0463128093873071	0.0537504855257162
rs35951344	TBX3	M01615	C	T	764.71	4.22	0.0468013774550323	0.0475044099907734
rs3091404	REST	REST_disc9	C	T	63414.63	14.73	0.0430521925958066	0.0433672902685568
rs3091404	REST	REST_disc9	C	T	108000	14.75	0.0435829086557397	0.042797134346294
rs3091404	REST	REST_disc9	C	T	82857.14	14.71	0.0505648620332472	0.0457585375143669
rs215897	ESRRA	ESRRA_known2	T	C	614.29	14.82	0.0541823226835463	0.0466812743783403
rs75581564	REST	REST_disc8	G	A	1090.91	15.11	0.043699981934975	0.0471347540083643
rs75581564	REST	REST_disc8	G	A	1071.43	15.07	0.0450711248383964	0.0487370144734057
rs4799936	EP300	EP300_disc9	G	A	10909.09	14.55	0.0431687599264889	0.0427703547859532
rs4799936	EP300	EP300_disc9	G	A	9767.44	14.56	0.0425722841944427	0.0427503636251641
rs12969480	SMAD5	SMAD5_SMAD5_2_HT-SELEX2	C	G	40.85	6.51	0.0482311003358414	0.0570503413355123
rs12969480	SMAD5	SMAD5_SMAD5_2_HT-SELEX2	C	G	37.5	6.51	0.0482183436311448	0.0861292123310139
rs12709690	ETV4	ETV4_1	C	T	176.92	14.93	0.0488638908867096	0.0667573820204664
rs62099183	TBP	TBP_UP00029A_1_UniPROBE	T	C	303.03	5.39	0.0475425015215072	0.0521722831665585
rs62099183	TBP	TBP_UP00029A_1_UniPROBE	T	C	375	5.37	0.0491856370209731	0.0520161280747165
rs62099236	YY1	YY1_known5	G	T	1406.25	14.93	0.0492752787940833	0.0668786699638911
rs12970424	CEBPB	CEBPB_known3	A	G	6818.18	14.9	0.0470289244257849	0.0462594880297575
rs12956208	FOSL2	FOSL2__JUNB_MA1138.1_JASPAR	A	G	47.62	8.45	0.0478802411510336	0.0614192328379019
rs12956208	BATF	BATF_BATF_HUMAN.H10MO.A	A	G	148.15	7.75	0.0481260876414028	0.050227429618886
rs12956208	FOSL1	FOSL1__JUND_MA1142.1_JASPAR	A	G	56.32	3.93	0.0478612015605429	0.0505047403599078
rs12956208	FOSL1	FOSL1__JUND_MA1142.1_JASPAR	A	G	80	3.71	0.0508169044279769	0.0467414641226126
rs12956208	FOSL1	FOSL1__JUNB_MA1137.1_JASPAR	A	G	56.76	4.26	0.0490419429567832	0.0575918657575256
rs12956208	FOSL1	FOSL1__JUND_MA1142.1_JASPAR	A	G	64.29	3.69	0.0478612015605429	0.0505047403599078
rs12956208	BATF	BATF_BATF_HUMAN.H10MO.A	A	G	156.52	7.76	0.0556371848464444	0.0493313436076601
rs12956208	FOSL1	FOSL1__JUNB_MA1137.1_JASPAR	A	G	58.62	4.32	0.0456614808868847	0.0443149138307185
rs2311117	TBP	TBP_UP00029A_1_UniPROBE	A	G	400	5.57	0.0477696618048622	0.0506569966483722
rs2311117	TBP	TBP_UP00029A_1_UniPROBE	A	G	510.53	5.56	0.046222159176975	0.0458268620090933
rs12606230	MYNN	M01370	C	T	118.18	7.29	0.0461857856168906	0.0637238425529581
rs9950000	HNF1A	HNF1A_4	T	C	93.33	7.2	0.0452928621932584	0.043675339091714
rs9950000	HNF1A	MA0046.2	T	C	73.33	7.25	0.0461803797329787	0.0458513633056874
rs9950000	HNF1A	HNF1A_4	T	C	76.67	7.27	0.0452928621932584	0.0458259395145278
rs9950000	HNF1A	MA0046.2	T	C	93.33	7.17	0.0461803797329787	0.043685777851555
rs9320010	POU2F2	POU2F2_M4470_1.02_CISBP	A	G	41.38	6.47	0.0492419014337612	0.0696784461112142
rs12958048	STAT5A	STAT5A_STA5A_HUMAN.H10MO.B	A	G	118.18	7.32	0.0459431988418024	0.0481529971730541
rs12958048	STAT5A	STAT5A_STA5A_HUMAN.H10MO.B	A	G	117.65	7.32	0.0473720445142291	0.0473907508987681
rs12958048	STAT5A	STAT5A_STA5A_HUMAN.H10MO.B	G	A	88.1	7	0.0459431988418024	0.0499118501152236
rs12958048	STAT5A	STAT5A_STA5A_HUMAN.H10MO.B	G	A	86.05	6.98	0.0473720445142291	0.0515826175180936
rs11884642	PRDM1	MA0508.3	T	C	42.86	5.21	0.0457570858221416	0.0561682934763656
rs2697368	FOXA1	MA0148.1	A	G	62.65	5.7	0.0505207890047754	0.0489863573191014
rs2697368	FOXA1	M01152	A	G	118.18	7.6	0.0501122272097641	0.0471890163804353
rs2697368	FOXA1	MA0148.1	A	G	66.23	5.71	0.0428640083600774	0.0422963498862068
rs2697368	FOXA1	FOXA1_FOXA1_HUMAN.H10MO.A	A	G	95.24	7.6	0.048383227469165	0.0465868298852714
rs2697368	FOXA1	FOXA1_FOXA1_HUMAN.H10MO.A	A	G	85.71	7.61	0.055672682950966	0.0484831246740021
rs2697368	FOXA1	MA0148.2	A	G	58.97	5.71	0.0485869630474732	0.0437686231615375
rs2697368	FOXA1	MA0148.2	A	G	59.04	5.7	0.0459896278630369	0.0492290398477894
rs2697368	FOXM1	M01171	A	G	295.45	6.09	0.0467083668263874	0.0438318686273185
rs2697368	FOXM1	M01171	A	G	307.69	6.1	0.0457121701750259	0.0452326667344695
rs60818447	ZBTB33	ZBTB33_known1	C	T	353.66	15.24	0.0479927433810843	0.0452943842536963
rs6435364	TBX3	M01615	A	G	296.7	4.94	0.0460693298603481	0.0492666747888896
rs55772859	CTCF	CTCF_disc9	C	A	623.66	14.92	0.0461989117115764	0.0519904535469311
rs55772859	CTCF	CTCF_disc9	C	A	540	14.97	0.0452768488259304	0.0451540099969694
rs62188630	NR3C1	NR3C1_known1	G	A	25490.19	15.11	0.0440542687925091	0.0465274061420735
rs62188630	NR3C1	NR3C1_known1	G	A	22413.79	15.09	0.0533834815893666	0.0465474932098797
rs62188630	NR3C1	NR3C1_known1	G	A	43333.33	15.21	0.0441423688445876	0.0478037779445621
rs62188630	EP300	EP300_disc3	G	A	1791.67	13.31	0.050256201852924	0.0480072044358901
rs62188630	NR3C1	NR3C1_known1	G	A	35135.13	15.22	0.0484487088751346	0.0454425993160198
rs1990777	NR3C1	NR3C1_known14	T	G	177.78	14.01	0.047494882155863	0.0492030048020818
rs1990777	NR3C1	NR3C1_known14	T	G	191.18	14.04	0.0658995735748077	0.0455500750823724
rs11682175	FOXA1	MA0148.2	T	C	52.38	6.19	0.0476859077370827	0.0455723088937674
rs11682175	FOXA1	MA0148.1	T	C	44	5.67	0.0495081754619769	0.0454284003124148
rs11682175	FOXA1	M01152	T	C	260	7.25	0.0465646935580374	0.0434175799137874
rs11682175	FOXA1	MA0148.2	T	C	55	6.26	0.0485869630474732	0.0437686231615375
rs11682175	FOXA1	MA0148.3	T	C	202.78	11.46	0.0584706024333866	0.048195645932851
rs11682175	FOXA1	MA0148.2	T	C	52.63	6.17	0.0537915401523493	0.0453372319091223
rs11682175	FOXA1	MA0148.3	T	C	185	11.44	0.0573948839222392	0.0491189174197348
rs11682175	FOXA1	M01152	T	C	282.35	7.13	0.0436879105229257	0.0447474000630442
rs11682175	FOXA1	M01152	T	C	268.42	7.14	0.0428855213580037	0.0422439717512323
rs11682175	FOXA1	MA0148.3	T	C	177.78	11.38	0.06057987732862	0.0488458602777022
rs11682175	FOXA1	FOXA1_FOXA1_HUMAN.H10MO.A	T	C	77.78	5.55	0.0494336939907333	0.0536565655827952
rs2717000	POU2F2	POU2F2_disc1	C	G	72	3.69	0.0509213099766476	0.042793301311045
rs2717000	POU2F2	POU2F2_known12	C	G	2962.96	15.37	0.0493078302942471	0.0556070793305493
rs2717000	POU2F2	POU2F2_known11	C	G	3404.26	15.23	0.0447287210625117	0.0559082703933702
rs2717000	POU2F2	POU2F2_disc1	C	G	71	3.72	0.0464168582362493	0.043898494901401
rs2717000	POU2F2	POU2F2_disc1	C	G	77.55	3.82	0.0481180957517327	0.0450524077658001
rs2717000	POU2F2	POU2F2_M4470_1.02_CISBP	C	G	47.37	6.21	0.0492419014337612	0.0581404651407873
rs111934601	POU2F2	POU2F2_POU2F2_8_HT-SELEX2	C	G	44.44	3.87	0.0456002038754506	0.0479809217253002
rs111934601	POU2F2	POU2F2_POU2F2_8_HT-SELEX2	C	G	40.74	3.84	0.0493716676823303	0.0473024101800247
rs57772411	RXRA	RXRA_disc4	A	C	818.18	15.02	0.0465110629740269	0.0505947668241977
rs57772411	RXRA	RXRA_disc4	A	C	760	14.99	0.0426680052665457	0.0465469175490259
rs73261805	JUNB	M01297	G	A	119.05	7.61	0.0445822970610612	0.0466599792154493
rs34859415	RXRA	RXRA_disc1	T	C	1240	14.93	0.0492482591642013	0.0646415946996713
rs34273582	FOXM1	FOXM1_1	T	A	211.9	15.37	0.0559885190523579	0.0480819192834263
rs6072299	EBF1	EBF1_disc2	G	A	1400	15.4	0.0448557983405407	0.0430047033417741
rs6072299	EBF1	EBF1_disc2	G	A	911.76	15.33	0.0451359519387902	0.0465828028293274
rs6072299	EBF1	EBF1_disc2	G	A	833.33	15.33	0.0442906494687507	0.0433092186403041
rs6072299	EBF1	EBF1_disc2	G	A	744.19	15.38	0.0457670721223046	0.0443648516763419
rs111934043	E2F1	E2F1_MA0024.1_JASPAR	C	G	39.34	4.35	0.0449227034903221	0.0448924938842188
rs111934043	E2F1	E2F1_MA0024.1_JASPAR	C	G	34.62	4.37	0.0440562681326331	0.0452586153179837
rs111934043	E2F1	MA0024.1	C	G	34.62	4.37	0.0447343566294127	0.0452586153179837
rs111934043	E2F1	MA0024.1	C	G	39.34	4.35	0.0441012343874649	0.0448924938842188
rs6072350	NANOG	NANOG_disc3	T	C	3636.36	14.07	0.0553140016744902	0.0474449064656243
rs6072350	POU2F2	POU2F2_disc2	C	T	1471.7	14.91	0.0474771732921425	0.0468619459811933
rs6072350	POU2F2	POU2F2_disc2	C	T	1111.11	14.96	0.0458838090094986	0.0502579250815046
rs6072350	RAD21	RAD21_disc7	C	T	157.14	14.5	0.0484549377932747	0.0460788130575578
rs61739307	RAD21	RAD21_disc7	G	A	291.67	15.2	0.0495010548993172	0.0472170896733536
rs61739307	RAD21	RAD21_disc7	G	A	294.74	15.19	0.061808536437118	0.047931366695457
rs7351166	SIN3A	SIN3A_disc6	C	T	600	14.85	0.0505276225196473	0.048802986192204
rs12624433	MYC	MYC_known6	G	A	490.91	15.28	0.0482651170824907	0.0470776628890718
rs12624433	USF2	USF2_USF2_2_HT-SELEX2	G	A	146.43	11.35	0.0615389645669494	0.0449261696493433
rs12624433	USF2	USF2_USF2_2_HT-SELEX2	G	A	159.26	11.33	0.0591471980485413	0.0460300880860553
rs12624433	MYC	MYC_known6	G	A	623.66	15.24	0.0538380419440358	0.0488519487954264
rs12624433	USF1	USF1_USF1_2_HT-SELEX2	G	A	83.87	11.5	0.0681048692302616	0.0467564597678121
rs71327107	EP300	EP300_disc8	G	T	1571.43	15.09	0.049301999257238	0.053268366335605
rs71327107	EGR1	EGR1_disc7	T	G	345.83	13.03	0.0452702365392793	0.0573986998513151
rs9611460	ESRRA	ESRRA_disc4	C	T	441.67	14.59	0.0510962150688741	0.047821564621647
rs6002277	NR2F6	NR2F6_M1434_1.02_CISBP	G	C	1137.25	5.47	0.0459827671697285	0.0575194981627166
rs6002277	RXRA	RXRA_known9	G	C	142.86	6.19	0.0468055092572508	0.0507356803215269
rs6002277	RXRA	RXRA_known9	G	C	154.93	6.21	0.047182834677814	0.0495923319661428
rs6002277	SIN3A	SIN3A_disc2	G	C	126.32	14.31	0.0551108623132113	0.0456434360983533
rs6002277	ESRRA	ESRRA_known2	G	C	159.65	14.92	0.0467206189002267	0.074721249793737
rs6002277	SIN3A	SIN3A_disc2	G	C	130.56	14.42	0.0482225958917371	0.0540837846457332
rs6002277	NR2F6	NR2F6_M1434_1.02_CISBP	G	C	932.43	5.48	0.0466534527675649	0.0486013874916164
rs6002277	NR2F1	NR2F1_NR2F1_DBD_3_HumanTF	G	C	34.55	10.5	0.0480941195460298	0.111375508685812
rs4822020	TCF3	TCF3_7	C	T	371.43	15.22	0.0471803006894564	0.0657597638322996
rs4822020	TCF12	TCF12_disc1	C	T	578.95	15.26	0.0496563954876692	0.0584099273840366
rs4822020	TBX3	TBX3_TBX3_2_HT-SELEX2	C	T	790.7	9.28	0.0461325186531753	0.0609109002212122
rs4822020	TBX3	TBX3_TBX3_2_HT-SELEX2	C	T	740	9.29	0.0472786899806032	0.0504095944013317
rs4822020	TBX3	MA1566.1	C	T	790.7	9.28	0.049396101478598	0.0609109002212122
rs4822020	TCF12	TCF12_HTF4_HUMAN.H10MO.B	C	T	897.44	7.64	0.0498777703171877	0.0436977754819544
rs4822020	TCF12	TCF12_HTF4_HUMAN.H10MO.B	C	T	785.71	7.63	0.048004023290138	0.0451977259467876
rs4822020	TCF3	TCF3_TCF3_DBD_HumanTF	C	T	121.43	10.37	0.0489025751259048	0.0654822735009305
rs73182462	YY1	YY1_YY1_methyl_1_HT-SELEX2	A	G	209.3	11.5	0.0487253466681325	0.0463282798721739
rs73182462	YY1	YY1_YY1_methyl_1_HT-SELEX2	A	G	204.82	11.52	0.0659412886721017	0.0473485532612925
rs9860241	FOXP1	MA0481.3	A	G	55.32	4.77	0.0771398603173045	0.0476794549814261
rs9860241	FOXP1	MA0481.3	A	G	51.92	4.75	0.0630820780179749	0.0477397902639273
rs9860241	FOXP1	FOXP1_M0717_1.02_CISBP	A	G	51.43	6	0.0519358625909822	0.043083963851938
rs9860241	FOXP1	FOXP1_M0717_1.02_CISBP	A	G	51.52	6.02	0.04935115565148	0.0447663265183763
rs4558712	HSF1	HSF1_HSF1_HUMAN.H10MO.A	A	G	37.27	3.04	0.0565398719161414	0.0487046884097656
rs4558712	IKZF1	IKZF1_1	G	A	104.88	15.16	0.0588993391970031	0.045408501663115
rs13086348	FOXA1	FOXA1_FOXA1_HUMAN.H10MO.A	C	A	66.67	7.4	0.048383227469165	0.0545735647750528
rs827808	POU2F2	POU2F2_POU2F2_methyl_4_HT-SELEX2	A	G	70.91	8.1	0.0767253445152285	0.0460115146194379
rs827808	POU2F2	POU2F2_POU2F2_methyl_4_HT-SELEX2	A	G	74.55	8.14	0.0617716150996524	0.0439238738139152
rs62635973	POU2F2	POU2F2_POU2F2_methyl_4_HT-SELEX2	A	G	74.55	8.14	0.0617716150996524	0.0439238738139152
rs62635973	POU2F2	POU2F2_POU2F2_methyl_4_HT-SELEX2	A	G	70.91	8.1	0.0767253445152285	0.0460115146194379
rs139347686	POU2F2	POU2F2_POU2F2_methyl_4_HT-SELEX2	A	G	74.55	8.14	0.0617716150996524	0.0439238738139152
rs139347686	POU2F2	POU2F2_POU2F2_methyl_4_HT-SELEX2	A	G	70.91	8.1	0.0767253445152285	0.0460115146194379
rs150045021	POU2F2	POU2F2_POU2F2_methyl_4_HT-SELEX2	A	G	74.55	8.14	0.0617716150996524	0.0439238738139152
rs150045021	POU2F2	POU2F2_POU2F2_methyl_4_HT-SELEX2	A	G	70.91	8.1	0.0767253445152285	0.0460115146194379
rs144943143	TBP	MA0108.2	A	G	123.08	4.8	0.0490015027974612	0.0518976816067636
rs144943143	TBP	MA0108.1	A	G	127.27	4.8	0.0469885979257844	0.0517330866298301
rs144943143	POU2F2	POU2F2_POU2F2_methyl_4_HT-SELEX2	A	G	70.91	8.1	0.0767253445152285	0.0460115146194379
rs144943143	TBP	TBP_M4010_1.02_CISBP	A	G	90.91	4.04	0.0469062918713451	0.0443345330970159
rs144943143	TBP	MA0108.1	A	G	127.27	4.81	0.0490656337137352	0.0436081830033913
rs144943143	TBP	MA0108.2	A	G	133.33	4.81	0.0554769381188771	0.0435310039327032
rs144943143	POU2F2	POU2F2_POU2F2_methyl_4_HT-SELEX2	A	G	74.55	8.14	0.0617716150996524	0.0439238738139152
rs699919	TCF3	TCF3_TCF3_DBD_HumanTF	A	T	339.13	5.61	0.0489025751259048	0.0447509329066368
rs699919	TCF3	TCF3_2	A	T	160	15.09	0.0490597111071795	0.0476765780465065
rs699919	TCF3	TCF3_6	A	T	61.29	6.32	0.0613318341444939	0.0469283261680329
rs699919	TCF3	MA0522.2	A	T	339.13	5.61	0.0622166118662071	0.0447509329066368
rs699919	TCF3	TCF3_7	A	T	339.13	5.61	0.0471803006894564	0.0726370017439968
rs1193537	RXRA	M01540	C	T	96.55	4.15	0.0471904365956903	0.0523580261381159
rs1193537	RXRA	RXRA_known9	C	T	51.61	4.56	0.0517376606574562	0.0496928797560988
rs1193537	RXRA	RXRA_known9	C	T	53.85	4.52	0.0468055092572508	0.0676854149984117
rs1193537	RXRA	M01540	C	T	87.5	4.15	0.0496416666848746	0.0449366168452939
rs1193537	RXRA	RXRA_known8	C	T	271.43	14.85	0.0571090834780724	0.0457119445199798
rs1193537	RXRA	M01541	C	T	77.78	4.36	0.0482651170824907	0.0505481015032498
rs1193537	ATF2	M01021	C	T	134.48	6.1	0.0490597111071795	0.0459915460969473
rs9838196	HDAC2	HDAC2_disc1	A	T	427.78	15.41	0.0533115989877931	0.0481109655795084
rs9838196	GATA2	MA0036.2	A	T	151.28	9.54	0.0642488680608034	0.0475818432370922
rs9838196	GATA2	MA0036.2	A	T	140	9.51	0.0453670771762789	0.0500049760233292
rs9838196	GATA2	GATA2_MA0036.2_JASPAR	A	T	151.28	9.54	0.0483007265930448	0.0475818432370922
rs865454	NR3C1	NR3C1_known1	G	A	14444.44	15.23	0.052188343299878	0.0496004013927001
rs865454	POU2F2	MA0507.1	A	G	47	8.94	0.0457660063555173	0.0543670380176894
rs865454	POU2F2	POU2F2_known12	A	G	51333.33	14.85	0.0427534782511786	0.0430460398570165
rs865454	POU2F2	POU2F2_known11	A	G	20204.08	15	0.0447287210625117	0.0446252206499202
rs865454	NR3C1	NR3C1_known1	G	A	14606.74	15.27	0.0441423688445876	0.0478037779445621
rs865454	POU2F2	POU2F2_known12	A	G	52142.86	14.87	0.0434932846555911	0.0429482714957167
rs865454	POU2F2	POU2F2_known11	A	G	18518.52	14.97	0.0462687499403446	0.0430632949336451
rs116532413	RFX5	RFX5_RFX5_methyl_1_HT-SELEX2	G	T	50	5.25	0.0525557508459933	0.0493325200363138
rs116532413	RFX5	RFX5_RFX5_methyl_1_HT-SELEX2	G	T	58.33	5.21	0.0528655680440029	0.0455473351205075
rs116532413	FOXP1	MA0481.1	T	G	81.82	6.79	0.044757225788866	0.0455414897128591
rs116532413	FOXP1	MA0481.1	T	G	76	6.81	0.0451212455190754	0.0441973155802564
rs9784311	KLF16	M01307	C	T	81.71	4.66	0.0448717671367925	0.0458689643664242
rs9784311	KLF16	M01307	C	T	94.87	4.79	0.0446675214768931	0.0462963367895167
rs9784311	KLF16	M01307	C	T	97.87	4.73	0.0451611337450991	0.0522766288105705
rs73170315	SOX13	SOX13_1	A	G	88.24	3.95	0.0464054507560996	0.0450049849484141
rs73170315	SOX13	SOX13_1	A	G	75	3.82	0.0527453407018132	0.0483347186639087
rs73170315	NR3C1	NR3C1_known5	A	G	1785.71	15.2	0.0604262779003032	0.0491377835173522
rs73170315	SOX13	SOX13_1	A	G	85	3.87	0.0503752624469741	0.0428151760888917
rs9846407	TCF7L2	TCF7L2_TF7L2_HUMAN.H10MO.A	T	C	112.99	8	0.0472489384130829	0.0552335206458662
rs4498080	HSF1	HSF1_MA0486.1_JASPAR	G	T	166.67	6.98	0.0469771776806689	0.0447292226842911
rs4498080	HSF1	HSF1_MA0486.1_JASPAR	G	T	159.26	6.98	0.0610513005730884	0.0469703254594048
rs4498080	HSF1	MA0486.1	G	T	166.67	6.98	0.0477317519632319	0.0447292226842911
rs4498080	HSF1	MA0486.1	G	T	159.26	6.98	0.0537448037662347	0.0469703254594048
rs7625504	ZEB1	ZEB1_known4	C	T	4705.88	14.85	0.0468824073383172	0.0430508462916882
rs1920015	SOX13	M01563	T	A	64.29	3.36	0.0495987074666699	0.0491200866193867
rs12715403	RUNX3	RUNX3_RUNX3_HUMAN.H10MO.C	G	C	138.46	7.8	0.046814033259688	0.0451560532467879
rs7617480	NR2F6	M01428	C	A	32.35	3.89	0.0773317796984024	0.0492371330933718
rs7617480	NR2F6	M01428	C	A	38.24	3.98	0.0565398719161414	0.0472786899806032
rs6774724	MEF2A	MEF2A_MEF2A_HUMAN.H10MO.A	T	G	91.95	7.79	0.0494853260712172	0.0566727597354932
rs6774724	MEF2A	MEF2A_MEF2A_HUMAN.H10MO.A	T	G	96.25	7.79	0.0492948805351015	0.051873447235595
rs4955440	ESRRA	ESRRA_disc4	C	T	234.78	14.51	0.0646484290524771	0.0498207489102164
rs4955440	PKNOX1	MA0782.2	C	T	36.3	4.56	0.0498459776650655	0.0676632710953265
rs62259947	YY1	YY1_YY1_methyl_1_HT-SELEX2	T	C	119.23	11.5	0.0568240258697191	0.0473196709168502
rs62259947	YY1	YY1_known5	T	C	5058.82	14.98	0.0453027555511285	0.0478511834393744
rs9817807	EGR1	EGR1_disc2	G	A	279.07	15.03	0.0495459206377735	0.0584774696626084
rs6446268	NANOG	NANOG_disc1	A	G	2066.67	15.29	0.0554944028946029	0.0441996279221919
rs7638750	FOXP1	FOXP1_1	T	A	369.23	14.53	0.0458793579758488	0.0528785818705352
rs62259933	EGR1	EGR1_disc2	G	A	979.59	15.03	0.0565889312089625	0.0443497298832814
rs62259933	ELF1	ELF1_disc1	G	A	178.26	15.03	0.0476949991523799	0.045548628540157
rs9860055	PRDM1	MA0508.3	T	C	53.57	5.53	0.0536106185861916	0.0490367519029439
rs9860055	PRDM1	MA0508.3	T	C	57.14	5.6	0.0459193908713845	0.0482019716492462
rs9860055	PRDM1	MA0508.3	T	C	54.29	5.56	0.0436500913614739	0.0482427054539242
rs9860055	PRDM1	MA0508.3	T	C	51.61	5.5	0.045523735240513	0.0522393953306881
rs7647973	SIN3A	SIN3A_disc6	G	A	13111.11	14.7	0.0436900733419647	0.043534505553881
rs7647973	SIN3A	SIN3A_disc6	G	A	10746.27	14.51	0.04876601572682	0.0435603730631014
rs7647973	SIN3A	SIN3A_disc6	G	A	5583.33	14.57	0.0438540519237784	0.0429355224473062
rs7644148	RXRA	RXRA_disc4	G	A	2337.66	14.17	0.0426680052665457	0.0444344430346135
rs7644148	RXRA	RXRA_disc4	G	A	937.5	14.15	0.0460426226988655	0.0468856881015469
rs7644148	RXRA	RXRA_disc4	G	A	2000	14.17	0.0432037859147233	0.0480910514583282
rs1982861	THAP1	MA0597.1	G	A	410	4.3	0.050381385190563	0.0486728536016437
rs9839082	MAFF	MAFF_MAFF_HUMAN.H10MO.A	T	G	43.33	7.37	0.0466440795939744	0.0824154750272252
rs9839082	MAFF	MA0495.3	T	G	31.6	4.71	0.0594994728668177	0.0484474691435416
rs1550343	NANOG	NANOG_disc4	A	C	726.19	14.98	0.0470827728707077	0.0528485803569199
rs1550343	POU2F2	POU2F2_known2	C	A	735.29	14.93	0.0543407051987779	0.0487031148886606
rs1550343	NANOG	NANOG_disc4	A	C	759.04	14.99	0.0451180589545627	0.0452971641741174
rs201504194	MAFF	MAFF_MAFF_HUMAN.H10MO.A	G	C	49.17	7.72	0.0466440795939744	0.0784663690465197
rs79021362	POU2F2	POU2F2_known4	T	A	57058.82	14.84	0.0455619481725263	0.0506473884476696
rs79021362	FOXM1	M01171	A	T	274.51	7.81	0.0467083668263874	0.0461518142606411
rs79021362	POU2F2	POU2F2_known4	T	A	60714.29	14.9	0.0431981311846942	0.0455588617421427
rs79021362	POU2F2	POU2F2_known4	T	A	48500	14.82	0.0453880928775296	0.0457446961950559
rs79021362	FOXM1	M01171	A	T	282.61	7.83	0.0457121701750259	0.0463628197931581
rs79021362	FOXM1	M01171	A	T	250	7.78	0.0466390043798481	0.0442144880651377
rs363096	STAT5A	STAT5A_M3985_1.02_CISBP	C	T	415.38	5.98	0.0467304547567408	0.0471955045015797
rs363096	STAT5A	STAT5A_M3985_1.02_CISBP	C	T	510.64	5.97	0.0502662641506147	0.043987548169681
rs363096	STAT5A	STAT5A_M3985_1.02_CISBP	C	T	510.64	5.96	0.0494605452198664	0.0453678657757793
rs363092	IKZF1	IKZF1_2	A	C	230.56	15.25	0.0494537089453056	0.14927788678375
rs110501	RFX5	RFX5_known4	C	T	818.18	15.32	0.0739376756856604	0.0443361569463157
rs110501	MYC	MYC_known6	T	C	165.71	14.98	0.0856393201991735	0.045149292317778
rs110501	RFX5	RFX5_known4	C	T	1384.62	15.28	0.0465553150796221	0.0440827676657454
rs110501	RFX5	RFX5_known4	C	T	1636.36	15.18	0.0498300806907116	0.0454176359635343
rs111065364	RUNX3	RUNX3_RUNX3_HUMAN.H10MO.C	C	G	100	7.48	0.050553400561496	0.0476488607116489
rs2237007	SP2	SP2_SP2_HUMAN.H10MO.C	C	T	56.82	4.64	0.0540477193322552	0.0475632517225287
rs2237007	REST	REST_disc8	C	T	6846.15	14.91	0.0450711248383964	0.0438698012284047
rs2237007	REST	REST_disc8	C	T	8817.2	14.96	0.043699981934975	0.044304720005515
rs2237007	REST	REST_disc4	C	T	961.54	14.56	0.0440571567275052	0.050899492544778
rs2237007	TCF12	TCF12_disc5	C	T	106.06	14.93	0.0471929705525732	0.0639336515970338
rs2237007	SP2	M01580	C	T	56.82	4.64	0.0460745619803341	0.0475632517225287
rs2237007	SP2	SP2_SP2_HUMAN.H10MO.C	C	T	57.14	4.7	0.0441061017458068	0.0559083660854933
rs2237007	REST	REST_disc4	C	T	1217.39	14.47	0.0510572932327172	0.047054517284688
rs2237007	SIN3A	SIN3A_disc5	C	T	196	15.17	0.0474245992866039	0.0524857571858531
rs2237007	SP2	M01580	C	T	59.09	4.77	0.0527155894129365	0.0481921255077651
rs2237007	SP2	SP2_SP2_HUMAN.H10MO.C	C	T	59.09	4.77	0.049812982328184	0.0481921255077651
rs2237007	REST	REST_disc5	C	T	1083.33	15.15	0.0506418467334582	0.0482601182973083
rs2237007	REST	REST_disc4	C	T	1181.82	14.52	0.0519380785315425	0.0431052291391177
rs2237007	REST	REST_disc8	C	T	4562.5	15	0.0432404639188569	0.044676986711231
rs2237007	CTCF	CTCF_disc8	C	T	414.29	15.32	0.0548865020568229	0.0462074648131712
rs2237007	SP2	M01580	C	T	57.14	4.7	0.0499225125938163	0.0559083660854933
rs2237007	SIN3A	SIN3A_disc5	C	T	142.42	15.21	0.0478187682443179	0.049504567720687
rs7727218	CEBPB	CEBPB_known5	G	A	84	15.21	0.0647236500474206	0.0469703254594048
rs11135348	NFIC	MA0161.2	C	A	102.78	3.48	0.0457478881565677	0.0509786481091921
rs11135348	STAT5A	STAT5A_M3985_1.02_CISBP	C	A	319.05	6.02	0.0494605452198664	0.0453678657757793
rs1363118	MYC	MYC_known12	C	T	116.22	15.28	0.0603226193467051	0.0470346472635827
rs1363118	MYC	MYC_known12	C	T	56.41	15.24	0.0487046884097656	0.051248274793096
rs1363118	MYC	MYC_known12	C	T	60.27	15.24	0.0676372300299627	0.0488498034313067
rs1363118	MYC	MYC_disc7	C	T	55	15.24	0.05324689464232	0.0487560156130699
rs10050495	REST	REST_disc10	T	C	379.31	15.06	0.0664908784799669	0.0467921483823755
rs10069830	FOXP1	FOXP1_M0717_1.02_CISBP	T	C	41.46	5.7	0.0635902061762925	0.0486832702941283
rs10069830	FOXP1	FOXP1_M0717_1.02_CISBP	T	C	42.5	5.69	0.0754559999228455	0.0491292498802125
rs10069830	FOXP1	MA0481.1	T	C	59.57	6.83	0.0502969207030027	0.0465026339384355
rs10069830	FOXP1	MA0481.3	T	C	37.93	4.16	0.086278232827245	0.0476417112760489
rs10069830	FOXA1	MA0148.4	T	C	41.67	4.2	0.0473974405455422	0.046593894126761
rs3872822	SIRT6	SIRT6_disc1	T	A	2909.09	15.4	0.0471777666932378	0.0452717059394854
rs3872822	USF2	MA0526.1	T	A	1225.81	10.66	0.0546172268231429	0.0450935393152607
rs3872822	USF2	MA0526.3	T	A	34.04	5.14	0.048086127298873	0.0521923107779743
rs3872822	USF2	MA0526.3	T	A	110.71	3.98	0.0559416807090899	0.0454897528911559
rs3872822	MITF	MA0620.3	T	A	42.86	4.88	0.107800965497355	0.0493895107184621
rs3872822	USF1	MA0093.2	T	A	51.88	3.6	0.0584574169616627	0.0487569783750018
rs3872822	MITF	MA0620.2	T	A	40.26	5.17	0.0589313518305204	0.0461791600833604
rs3872822	USF1	MA0093.3	T	A	89.29	4.04	0.0561171329293829	0.0439590926541786
rs3872822	USF1	MA0093.3	T	A	38.89	5.29	0.0561171329293829	0.0489854374967178
rs3872822	MITF	MA0620.3	T	A	43.75	3.88	0.107800965497355	0.0493895107184621
rs3872822	USF1	MA0093.3	T	A	38.46	5.28	0.0579881524859938	0.0459371832784463
rs3872822	MITF	MA0620.3	T	A	46.43	3.85	0.0535629012602067	0.0438953367796255
rs3872822	USF2	MA0526.3	T	A	33.33	5.13	0.0559416807090899	0.0496766469974978
rs3872822	SIRT6	SIRT6_disc1	T	A	2666.67	15.4	0.0517520860556976	0.0469908819562382
rs3872822	USF1	USF1_USF1_DBD_HumanTF	T	A	62.79	7.76	0.046891092700181	0.0468745644637729
rs3872822	NFE2	NFE2_disc2	T	A	52.17	14.94	0.0613455487969277	0.0486530399505126
rs3872822	USF2	MA0526.3	T	A	116.67	3.96	0.048086127298873	0.0440826068924243
rs3872822	MYC	MYC_known3	T	A	172.34	14.91	0.0523876821547763	0.04666356877366
rs3872822	USF1	MA0093.3	T	A	96.43	4.06	0.0492164698639541	0.0459371832784463
rs3872822	MITF	MITF_MITF_HUMAN.H10MO.C	T	A	257.58	5.34	0.0481180957517327	0.0435643888613446
rs3872822	MITF	MITF_MITF_HUMAN.H10MO.C	T	A	270.59	5.35	0.0541823226835463	0.0476948673672368
rs3872822	MITF	MA0620.3	T	A	42.86	4.89	0.0535629012602067	0.0462782710711274
rs3872822	USF2	MA0526.1	T	A	1181.82	10.68	0.066058911209438	0.0465356485361397
rs3872822	USF1	USF1_MA0093.2_JASPAR	T	A	51.88	3.6	0.0754846299911186	0.0487569783750018
rs3872822	MITF	MA0620.2	T	A	34.38	4.13	0.0695330575685793	0.0486066770364666
rs28524171	FOXA1	MA0148.1	A	C	42.42	5.91	0.0495081754619769	0.047618172015889
rs28524171	TBP	TBP_UP00029A_1_UniPROBE	A	C	815.38	3.61	0.0477577752396791	0.0436264982949143
rs4700487	STAT3	MA0144.2	A	T	247.06	11.23	0.0496416666848746	0.0441202428216524
rs4700487	STAT3	MA0144.2	A	T	247.06	11.22	0.0486320050941628	0.0457275663789442
rs3822485	TCF7	MA0769.2	A	C	41.03	5.43	0.0647889676091664	0.0491444587322889
rs3822485	TCF7	TCF7_MA0769.2_JASPAR	A	C	41.03	5.43	0.0565128165237908	0.0491444587322889
rs3822485	TCF7	TCF7_MA0769.2_JASPAR	A	C	44.44	5.47	0.0529650048122892	0.0486010157748523
rs3822485	TCF7L2	TCF7L2_known5	A	C	60	6.85	0.0537358786635498	0.0447352534478132
rs3822485	TCF7L2	TCF7L2_known6	A	C	84.62	6.86	0.0433549325734321	0.043158038466244
rs3822485	TCF7L2	TCF7L2_known5	A	C	60	6.89	0.0481203689538027	0.0437342024462856
rs3822485	TCF7L2	TCF7L2_known5	A	C	61.11	6.93	0.0519677103049571	0.0487552098868694
rs3822485	TCF7	MA0769.2	A	C	44.44	5.47	0.0540196618481577	0.0486010157748523
rs3822485	TCF7L2	TCF7L2_known6	A	C	90.91	6.89	0.0510451310310532	0.0469231846764008
rs3822485	TCF7L2	TCF7L2_known6	A	C	84.62	6.82	0.044881392215871	0.0438739650637685
rs12696989	RXRA	RXRA_disc4	T	A	232.56	15.07	0.0470934518927723	0.0640709774582681
rs10645782	POU2F2	POU2F2_POU2F2_methyl_3_HT-SELEX2	A	C	226.19	8.26	0.0462598376875043	0.0450253428005572
rs10645782	RXRA	RXRA_disc4	C	A	220.93	14.96	0.0470934518927723	0.0652669004329591
rs10645782	POU2F2	POU2F2_POU2F2_methyl_3_HT-SELEX2	A	C	236.56	8.23	0.0458274645372485	0.0454936638070271
rs10645782	POU2F2	POU2F2_POU2F2_methyl_3_HT-SELEX2	A	C	240.96	8.26	0.044442826871415	0.0429982394251003
rs12696990	POU2F2	POU2F2_known13	G	A	60.53	4.81	0.0477821275417998	0.0541071810230404
rs12696990	POU2F2	POU2F2_POU2F2_5_HT-SELEX2	G	A	380.43	10.94	0.0492419014337612	0.0631904957167219
rs12696990	POU2F2	POU2F2_known13	G	A	63.04	4.86	0.0506343542982465	0.0471655837610475
rs12696990	POU2F2	POU2F2_5	G	A	50	6.81	0.0467324219148552	0.0496470389409936
rs12696990	POU2F2	POU2F2_1	G	A	36.88	5.48	0.0492546168297489	0.0582230069498784
rs12696990	POU2F2	POU2F2_1	G	A	34	5.37	0.0551904401619711	0.048578643292133
rs12696990	POU2F2	POU2F2_known13	G	A	56.76	4.75	0.0499095612360925	0.0558721549903023
rs12696990	POU2F2	POU2F2_5	G	A	69	6.87	0.0450649266262822	0.0463545489748509
rs12696990	POU2F2	POU2F2_5	G	A	67.27	6.92	0.0492482591642013	0.0555005153805339
rs247910	SPI1	SPI1_disc1	G	A	325.93	15.09	0.0490478657286677	0.0637413435955302
rs247910	SPI1	SPI1_disc1	G	A	468.42	15.09	0.0594754420030794	0.0498489582996861
5:93745680:T:A	NR3C1	NR3C1_known14	A	T	78.26	14.81	0.047494882155863	0.0492030048020818
rs240784	BATF	BATF_disc1	C	T	84.78	15.22	0.0679514869325817	0.0453805816134328
rs13201267	SP2	SP2_disc2	T	C	810	15.27	0.0538380419440358	0.0456039980938498
rs34716527	FOXA1	MA0148.2	T	C	72.63	6.17	0.0451826611082707	0.0452997119721254
rs34716527	FOXA1	MA0148.1	T	C	53.12	5.59	0.0509951757310864	0.0458366471199802
rs34716527	FOXA1	M01152	T	C	219.23	7.12	0.0428855213580037	0.0428717939393436
rs62422111	EP300	EP300_disc2	T	C	1500	15.02	0.0482373690249752	0.0551633240996151
rs12528131	BHLHE40	BHLHE40_disc2	G	A	1611.11	13.86	0.0482853785700977	0.0459330046794266
rs12528131	BHLHE40	BHLHE40_disc2	G	A	1474.58	13.86	0.0479417933986778	0.0486334971145311
rs12528131	BHLHE40	BHLHE40_disc2	G	A	990	13.83	0.0481228212248698	0.0501766997151013
rs12528131	PAX5	PAX5_disc5	G	A	933.33	15.17	0.048720182163984	0.0757627413819182
rs314276	POU2F2	POU2F2_known2	A	C	5000	14.86	0.0446896797724022	0.0463585540847387
rs314276	POU2F2	POU2F2_known2	A	C	4130.43	14.86	0.0482311003358414	0.0450243681661139
rs314283	TCF12	TCF12_disc5	T	C	509.09	14.75	0.0624500013255992	0.04305782051425
rs2181191	TBP	TBP_UP00029A_1_UniPROBE	A	G	346.43	5.39	0.0470990707636262	0.0505801086267716
rs2181191	TBP	TBP_UP00029A_1_UniPROBE	A	G	283.78	5.91	0.0479892703345017	0.0521722831665585
rs2181191	TBP	TBP_UP00029A_1_UniPROBE	A	G	718.18	5.56	0.0445076853792671	0.0437883582187019
rs314273	GATA2	GATA2_MA0036.3_JASPAR	T	G	84.62	5.88	0.0487782805057486	0.052154150011619
rs314273	GATA1	MA0035.3	T	G	231.58	11.48	0.0499006202156421	0.0644931227593342
rs314273	GATA2	GATA2_MA0036.2_JASPAR	T	G	197.06	10.07	0.0483007265930448	0.0449454204923356
rs314273	GATA2	MA0036.3	T	G	84.62	5.88	0.0497550126986405	0.052154150011619
rs314273	GATA2	MA0036.2	T	G	197.06	10.07	0.0585355996600716	0.0449454204923356
rs314272	TCF7L2	TCF7L2_disc2	G	A	184.62	15.05	0.0576532182180313	0.0458602751474812
rs7753052	ZBTB7A	MA0750.2	G	A	44.44	4.56	0.0505736617668236	0.0495753825854891
rs7753052	ELF1	ELF1_disc2	G	A	448.28	14.93	0.0566078573665233	0.0439005294671624
rs725085	GATA2	GATA2_MA0036.2_JASPAR	C	T	196.67	9.78	0.0483007265930448	0.0449454204923356
rs725085	GATA2	MA0036.2	C	T	196.67	9.78	0.0585355996600716	0.0449454204923356
rs9377071	POU2F2	POU2F2_known5	G	A	410.26	14.9	0.046819970410145	0.0464237841381512
rs9377071	POU2F2	POU2F2_known5	G	A	365.85	14.9	0.0486065529167975	0.0448875980174589
rs200482	MITF	MITF_MITF_HUMAN.H10MO.C	G	A	184.21	5.69	0.0481180957517327	0.0435643888613446
rs370155	SREBF2	SREBF2_SRBP2_HUMAN.H10MO.B	G	T	256.25	5.85	0.0458185916466751	0.0484396485293066
rs370155	SREBF2	SREBF2_SRBP2_HUMAN.H10MO.B	G	T	230.3	5.84	0.045712584926503	0.0462469608907184
rs390764	GATA4	MA0482.2	T	C	48.48	5.13	0.0439375720592312	0.0444949618744429
rs390764	GATA2	GATA2_MA0036.3_JASPAR	T	C	65.22	5.74	0.0485710412418988	0.0503363936753198
rs200496	REST	REST_disc8	G	A	1697.67	14.88	0.0466670436942366	0.0439145360952862
rs200496	SP2	SP2_SP2_HUMAN.H10MO.C	G	A	46.25	4.64	0.0567661742658921	0.0481921255077651
rs200496	YY1	YY1_disc5	G	A	3870.97	14.92	0.0458392487287827	0.04648884197581
rs200496	SIN3A	SIN3A_disc6	G	A	2458.33	14.99	0.0459027539080343	0.0429816953996004
rs200496	TCF12	TCF12_disc5	G	A	432.84	14.91	0.0464783908901808	0.0466195217707685
rs200496	TCF12	TCF12_disc5	G	A	420.29	14.9	0.0524650450664871	0.0450091501125838
rs200496	YY1	YY1_disc5	G	A	4098.36	14.91	0.0462619547102153	0.0486812048729135
rs200496	SP2	M01580	G	A	46.25	4.64	0.063194575240017	0.0481921255077651
rs200496	REST	REST_disc8	G	A	1586.96	14.88	0.0432404639188569	0.0454711956323097
rs200496	SIN3A	SIN3A_disc6	G	A	2565.22	15	0.0458410510051863	0.043534505553881
rs200493	YY1	YY1_known2	A	G	619.05	15.17	0.0545917983788031	0.0446054785252592
rs58726701	POU2F2	POU2F2_known4	A	T	16455.7	14.82	0.0473789494653441	0.0541375502534388
rs58726701	FOXM1	M01171	T	A	689.66	7.83	0.0429516659396315	0.0430388028293901
rs200490	FOXA1	M01152	T	G	171.15	7.58	0.0465646935580374	0.0438752546145263
rs200490	FOXA1	MA0148.1	T	G	42.42	5.91	0.0495081754619769	0.047618172015889
rs200490	FOXA1	M01152	T	G	180.77	7.59	0.0476511509812001	0.0497412986522491
rs200983	NR2F1	MA0017.1	T	C	26.67	4.38	0.049399015991645	0.0641033971419824
rs200950	POU5F1	POU5F1_known2	A	G	3578.95	13.09	0.0433959281704262	0.0435988152377553
rs200950	POU5F1	POU5F1_known2	A	G	3578.95	13.08	0.0447953356717067	0.0429171061871823
rs493161	POU2F2	POU2F2_known8	T	A	267.74	14.78	0.0477150463621517	0.0636861566597133
rs200966	SIN3A	SIN3A_disc2	C	T	134.21	15.19	0.0712144224581165	0.0475572947833062
rs200966	MYC	MYC_known1	C	T	38.1	15.19	0.0498141832850511	0.102423522227139
rs200966	ESRRA	ESRRA_known2	C	T	161.4	15.19	0.0467206189002267	0.074721249793737
rs200966	MYC	MYC_known15	C	T	266.67	15.19	0.0495974780994594	0.054263206392533
rs200966	SIN3A	SIN3A_disc2	C	T	136.84	15.19	0.0551108623132113	0.0456434360983533
rs200966	NR2F1	NR2F1_NR2F1_DBD_3_HumanTF	C	T	38.18	10.77	0.0480941195460298	0.0996731255987991
rs200966	MYC	MYC_known2	C	T	85.71	15.19	0.0473043177959885	0.102849485182747
rs200966	MITF	M01354	C	T	54.55	7.35	0.0856041667907538	0.049803302617837
rs200966	MITF	M01354	C	T	53.57	7.35	0.0713101293560482	0.0473475235658432
rs17364281	POU2F2	POU2F2_4	C	T	35.8	5.44	0.0585084047968734	0.0491574829175962
rs17364281	POU2F2	POU2F2_POU2F2_methyl_2_HT-SELEX2	C	T	750	8.9	0.0576469481282735	0.0429315226232536
rs17364281	POU2F2	POU2F2_POU2F2_8_HT-SELEX2	C	T	51.61	3.01	0.0446309793976796	0.0471376164972918
rs58683261	MEF2A	M01342	T	G	130.95	7.81	0.044868244679184	0.0458482625047909
rs7809993	SP2	M01580	C	G	100	5.24	0.0436650878000699	0.0437116960691519
rs7809993	SP2	MA0516.1	C	G	176.92	8.47	0.0584266488593889	0.046170965282187
rs7809993	SP2	MA0516.1	C	G	204.82	8.59	0.0453233030296101	0.0518391637571572
rs7809993	SP2	Sp2_MA0516.1_JASPAR	C	G	176.92	8.47	0.0467265204273192	0.046170965282187
rs7809993	SP1	SP1_known2	C	G	3571.43	15.12	0.0448588673115744	0.0455622906636302
rs7809993	SP1	SP1_known5	C	G	2782.61	15.11	0.0481605516380291	0.0508138783900828
rs7809993	SP2	SP2_SP2_HUMAN.H10MO.C	C	G	100	5.33	0.0441061017458068	0.0432236070589208
rs7809993	SP2	M01580	C	G	100	5.33	0.0442516733261251	0.0432236070589208
rs7809993	SP1	SP1_SP1_HUMAN.H10MO.C	C	G	82	5.34	0.0596386739555083	0.0499599270946026
rs7809993	SP2	MA0516.1	C	G	202.38	8.59	0.0451405907313105	0.0437172350673068
rs7809993	SP2	Sp2_MA0516.1_JASPAR	C	G	202.38	8.59	0.0553434437856782	0.0437172350673068
rs7809993	SP1	SP1_known6	C	G	1242.42	14.99	0.0597949178112648	0.0491531737100676
rs7809993	SP1	SP1_SP1_HUMAN.H10MO.C	C	G	76.36	5.24	0.0538617242117617	0.0483817191065745
rs7809993	SP2	SP2_SP2_HUMAN.H10MO.C	C	G	100	5.23	0.0438809168541188	0.0447818665845917
rs7809993	SP1	SP1_known5	C	G	2958.33	15.07	0.0458828224891545	0.0578560485048816
rs7809993	SP2	SP2_SP2_HUMAN.H10MO.C	C	G	100	5.24	0.0435566546743203	0.0437116960691519
rs7809993	SP1	SP1_known5	C	G	2916.67	15.07	0.0454543523184166	0.0439915985266008
rs7809993	REST	REST_disc4	C	G	369.86	15.12	0.0642203620207281	0.0496299983838577
rs7809993	SP2	M01580	C	G	100	5.23	0.0503213999708567	0.0447818665845917
rs7809993	SP1	SP1_known6	C	G	1000	14.87	0.0494126896888315	0.063761293823528
rs7809993	SP1	SP1_known2	C	G	3100	15.09	0.0489177718739831	0.0442660821613824
rs3807866	SREBF2	SREBF2_SRBP2_HUMAN.H10MO.B	G	A	137.04	3.93	0.0458185916466751	0.0484396485293066
rs3807866	POU2F2	POU2F2_disc2	G	A	405.56	15.17	0.0664461465892473	0.0483101601513573
rs10234805	SP1	SP1_known7	C	T	619.05	12.93	0.0494537089453056	0.0568423840507932
rs10234805	ELF1	ELF1_disc2	C	T	413.79	14.78	0.0580742317796222	0.0470012023128684
rs10234805	ELF1	ELF1_disc2	C	T	382.35	14.72	0.0624648555943597	0.0439005294671624
rs10234805	SP1	SP1_known7	C	T	568.18	12.83	0.0492546168297489	0.0469043919897299
rs10278257	RXRA	RXRA_disc3	T	C	1289.47	3.63	0.0486995237445159	0.100502770333903
rs10278257	BACH1	BACH1_1	T	C	289.47	15.11	0.0567181904180913	0.0466178341851768
rs10278257	RXRA	RXRA_disc3	T	C	2095.24	3.58	0.0490360201298609	0.0505672924054904
rs10278257	BACH1	BACH1_1	T	C	239.13	15.08	0.05324689464232	0.0446395499596961
rs4721061	RXRA	RXRA_disc4	G	C	452.38	14.75	0.0437415507451887	0.0500285918834948
rs7809700	POU2F2	POU2F2_3	A	G	53.54	4.47	0.0489994676357091	0.0556802128718665
rs28549831	NFATC1	NFATC1_NFAC1_HUMAN.H10MO.A	C	T	323.23	7.92	0.0484011407235732	0.0486716048044055
rs28549831	SRF	SRF_SRF_methyl_1_HT-SELEX2	C	T	80	9.25	0.0601649088436742	0.0460329931458997
rs28549831	SRF	MA0083.1	C	T	26.67	5.01	0.054263206392533	0.0486736998155305
rs28549831	SRF	SRF_SRF_methyl_1_HT-SELEX2	C	T	73.33	9.25	0.0490360201298609	0.0498877051657809
rs28549831	SRF	SRF_known2	C	T	358.97	15.17	0.0541014233267883	0.0464054507560996
rs28549831	NFATC1	NFATC1_NFAC1_HUMAN.H10MO.A	C	T	337.5	7.99	0.0487098530347763	0.046651578140723
rs28549831	SRF	SRF_known2	C	T	400	15.24	0.0527709616867392	0.0494793445789086
rs28549831	SRF	SRF_MA0083.1_JASPAR	C	T	26.67	5.01	0.048248108915341	0.0486736998155305
rs28549831	SRF	SRF_known2	C	T	4482.76	15.02	0.0541014233267883	0.0464054507560996
rs28549831	SRF	SRF_known2	C	T	5000	15.02	0.0527709616867392	0.0454020684177047
rs28549831	SRF	SRF_known4	C	T	407.41	15.02	0.0466497035099418	0.0497853681401263
rs1468803	HNF1A	HNF1A_4	A	C	100	8.38	0.0452928621932584	0.043675339091714
rs1468803	HNF1A	MA0046.2	A	C	100	8.33	0.0461803797329787	0.043685777851555
rs1990622	RXRA	RXRA_disc4	G	A	937.5	14.15	0.0460426226988655	0.0468856881015469
rs1990622	CTCF	CTCF_disc1	G	A	1132.35	15.19	0.0517232348385123	0.0490834012021708
rs1990622	RXRA	RXRA_disc4	G	A	800	14.12	0.0470225193694589	0.0543423530905394
rs1990622	CTCF	CTCF_disc1	G	A	1209.68	15.23	0.0478612015605429	0.0486141576039037
rs1990620	SPI1	SPI1_known1	A	G	61.82	13.83	0.0479476219939304	0.0774233781438284
rs1990620	SP2	SP2_disc1	A	G	250	14.97	0.0549375490300403	0.0472152530742857
rs11763813	EP300	EP300_disc9	C	T	1265.82	14.73	0.0483618358370453	0.0455058161951
rs11763813	EP300	EP300_disc9	C	T	1366.2	14.79	0.0498365650529814	0.0464041508074714
rs62436669	REST	MA0138.1	A	G	20	4.75	0.123282941817205	0.0497267398741544
rs28728306	CTCF	CTCF_disc9	C	A	935.48	14.92	0.0461989117115764	0.0492156767424581
rs28728306	BHLHE40	BHLHE40_disc2	C	A	769.23	14.07	0.0498718794907071	0.0515078640605284
rs28728306	BHLHE40	BHLHE40_disc2	C	A	407.41	14.03	0.0528639409488519	0.0489989110850679
rs28728306	CTCF	CTCF_disc9	C	A	1558.82	14.95	0.0452768488259304	0.0451540099969694
rs28728306	EBF1	EBF1_disc2	C	A	218.75	15.22	0.0457670721223046	0.0535073083726978
rs28728306	YY1	YY1_disc5	C	A	2000	14.45	0.0563563981728293	0.0485630720976026
rs28728306	YY1	YY1_disc5	C	A	2166.67	14.49	0.0460149039426161	0.0492097855743818
rs28728306	EBF1	EBF1_disc2	C	A	281.82	15.25	0.0482996636488884	0.0458941141556742
rs1403175	POU2F2	POU2F2_known13	T	A	43.33	5.63	0.0499095612360925	0.0609197308802659
rs78443464	MYC	MYC_disc9	C	T	1217.39	14.78	0.0451458921870893	0.0487205338603719
rs62442913	ATF3	ATF3_disc4	G	A	3500	14.9	0.0605907736945688	0.0446351271913385
rs62442913	ATF3	ATF3_disc4	G	A	3291.67	14.89	0.0463858947514299	0.0495666181417902
rs62442913	ATF3	ATF3_disc4	G	A	4352.94	14.93	0.0483608171334216	0.047352721862314
rs113917824	ESRRA	ESRRA_disc4	G	A	1500	14.46	0.0454985510087924	0.0430390926379412
rs113917824	CTCF	CTCF_disc9	G	A	347.06	14.8	0.0461989117115764	0.0579119377167914
rs113917824	CTCF	CTCF_disc9	G	A	450	14.84	0.0452768488259304	0.0451540099969694
rs113917824	BHLHE40	BHLHE40_disc2	G	A	4074.07	14.85	0.0442286155329915	0.0451733872208597
rs113917824	BHLHE40	BHLHE40_disc2	G	A	6250	14.89	0.0431686141804665	0.045123813382353
rs55988458	REST	REST_disc5	G	A	2842.11	14.34	0.0493952776374554	0.0480617876258723
rs55988458	NANOG	NANOG_disc3	A	G	2911.76	14.82	0.0553140016744902	0.0474449064656243
rs55988458	TCF3	MA0522.1	A	G	100	10.96	0.0492419014337612	0.0499656638162088
rs55988458	REST	REST_disc5	G	A	2954.55	14.37	0.0444633152082978	0.0428709085523616
rs1533827	NFE2L2	NFE2L2_2	C	T	372.09	14.09	0.0525475597099901	0.0493732786829206
rs11772463	MAFF	MAFF_MAFF_HUMAN.H10MO.A	A	C	41.54	7.37	0.0466440795939744	0.0824154750272252
rs11763750	ETV4	ETV4_1	A	G	98.96	15.2	0.0558884727348015	0.0487962784589689
rs11763750	NEUROD1	MA1109.1	G	A	52.63	5.31	0.0492164698639541	0.0573123778610745
rs11763750	ETV4	ETV4_1	A	G	256.41	15.19	0.0488638908867096	0.0477513822922971
rs11763750	NEUROD1	MA1109.1	G	A	54.71	5.37	0.0465517393760994	0.0507757500968073
rs55810445	NFE2L2	NFE2L2_2	T	C	8378.38	15.23	0.0464920412639751	0.0434166423753819
rs55810445	NFE2L2	NFE2L2_2	T	C	10000	15.23	0.0477317519632319	0.0439310667724714
rs55810445	NANOG	NANOG_disc3	T	C	13114.75	14.82	0.0553140016744902	0.0444370355080886
rs55810445	NFE2L2	NFE2L2_2	T	C	8648.65	15.21	0.0468179045459234	0.0440886627025224
rs55810445	NANOG	NANOG_disc3	T	C	12698.41	14.75	0.0604980745929156	0.0478336732316709
rs55810445	MAFF	M01329	T	C	36.96	4.28	0.0494810535827217	0.0586524046418517
rs62444919	SMAD1	M01552	T	C	190.48	4.19	0.0474030839972895	0.0435200196349635
rs62444919	SMAD1	M01552	T	C	164.38	4.19	0.0464021914504196	0.0436201947197217
rs62444919	ZBTB7A	ZBTB7A_disc2	C	T	88.89	15.31	0.0582199906753403	0.0495518144177671
rs62444919	SMAD1	M01552	T	C	178.57	4.16	0.0461832308295951	0.0429109766155112
rs62444919	SP4	SP4_1	C	T	28.89	5.39	0.0798901681816777	0.0470467017405118
rs11772627	TCF3	MA0522.1	C	G	61.9	11.38	0.0492419014337612	0.0635864797695649
rs59400883	FOXP1	M01176	T	A	160	7.32	0.0457818047040825	0.0450885926297205
rs59400883	FOXP1	M01176	T	A	171.43	7.36	0.0447830973301536	0.0439078872832975
rs3094467	HDAC2	HDAC2_disc4	G	A	964.91	15.25	0.0485520763208834	0.0646674504084473
rs3094467	NFIC	M01392	A	G	400	7.72	0.0582930401436346	0.0468711245766975
rs3094467	NFIC	NFIC_NFIC_HUMAN.H10MO.A	A	G	47.27	4.51	0.0490937653406927	0.0600167392955892
rs3094466	YY1	YY1_known7	A	T	105	4.57	0.0946638300307657	0.0479287799156211
rs3094466	YY1	YY1_YY1_full_HumanTF	A	T	105	4.53	0.0483966102515854	0.0446367765222365
rs7841297	PBX3	M01469	C	G	169.49	7.41	0.0460888346175717	0.0552950706136767
rs12677582	MAFF	M01328	C	T	36.49	3.86	0.0486834682835087	0.0504113809811566
rs12677582	MAFF	MAFF_MAFF_methyl_5_HT-SELEX2	C	T	100	8.98	0.0482736210111578	0.0456957223948879
rs61146973	TCF12	TCF12_disc1	G	A	552.63	15.18	0.0496563954876692	0.0711702602078295
rs61146973	TCF3	TCF3_TFE2_HUMAN.H10MO.C	G	A	84.31	6.18	0.0856627521873021	0.0488064754853166
rs10087071	MYNN	M01370	A	T	1869.57	7.49	0.0438564274984478	0.0426664415103506
rs10087071	MYNN	M01370	A	T	2000	7.51	0.0459179332382302	0.0430666213043618
rs62551585	SOX6	MA0515.1	A	G	34.29	7.14	0.0483138361042571	0.0478608490448964
rs62551585	SOX13	M01563	A	G	134.15	3.27	0.0434698184731549	0.0446980819214118
rs10759882	NFIC	NFIC_NFIC_HUMAN.H10MO.A	C	T	78.95	5.69	0.0460654057523138	0.0457873207053762
rs11789302	CEBPB	CEBPB_known1	T	G	2529.41	14.88	0.0485129183591947	0.0449950425844592
rs11789302	CEBPB	CEBPB_known1	T	G	2097.56	14.9	0.0471726986772301	0.044625172466263
rs6478629	ESRRA	ESRRA_disc4	G	A	722.89	14.35	0.0496858520015302	0.0430390926379412
rs6478629	ESRRA	ESRRA_disc4	G	A	441.67	14.51	0.0510962150688741	0.047821564621647
rs6478629	ESRRA	ESRRA_disc4	G	A	481.82	14.52	0.0505634046162629	0.0468312178066741
rs1752164	IRF4	IRF4_IRF4_methyl_1_HT-SELEX2	T	C	197.8	6.28	0.0627772561295343	0.0480340773126339
rs1752164	SIX5	SIX5_known3	T	C	100	7.37	0.0514456222850757	0.0472733444868833
rs1752164	SIX5	SIX5_known7	T	C	60	6.25	0.0464920412639751	0.0467181599189397
rs1752164	SIX5	SIX5_known4	T	C	118.67	7.05	0.0481885770888755	0.046488628689536
rs1752164	SIX5	SIX5_known6	T	C	54.55	6.87	0.0525519391471741	0.0478011444251376
rs1752164	SIX5	SIX5_known7	T	C	60.71	6.27	0.0498459776650655	0.0546939628845326
rs1752164	SIX5	SIX5_known1	T	C	100	6.99	0.0517665110327851	0.046387524434109
rs1752164	SIX5	SIX5_known3	T	C	100	7.35	0.0467324219148552	0.0464737775236047
rs1752164	SIX5	SIX5_known4	T	C	108.75	7.03	0.0475038284316724	0.0447888584795854
rs1752164	IRF4	IRF4_IRF4_methyl_1_HT-SELEX2	T	C	188.89	6.22	0.0514324745273244	0.0469284864629469
rs1752164	SIX5	SIX5_known1	T	C	86.67	6.97	0.0466478288752224	0.0452837297896045
rs1752169	RUNX3	RUNX3_RUNX3_HUMAN.H10MO.C	A	C	340	7.8	0.0432998573809098	0.0451560532467879
rs1752169	RUNX3	M01539	A	C	72.41	4.76	0.0528925678067813	0.0485515586997514
rs543070	BATF	BATF_BATF_HUMAN.H10MO.A	A	G	166.67	7.76	0.0556371848464444	0.0493313436076601
rs625271	CTCF	CTCF_disc9	C	T	7647.06	14.29	0.0452768488259304	0.0433541924618202
rs625271	SIX5	SIX5_disc1	C	T	190.62	15.26	0.0571056283242274	0.048184269958933
rs3793577	MAFF	MA0495.3	A	G	76.27	5.39	0.0457617432776667	0.0437740134698247
rs3793577	MAFF	MA0495.3	A	G	76.27	5.36	0.0469954499985583	0.0438787906303232
rs3793577	MAFF	MA0495.3	A	G	72.31	5.46	0.044794854635183	0.0430595156674536
Analysis of TF regulation by RSAT with GV-TF-PSSM analyzed binding site combinations along with the resulting best and worst variant; p-value ratio and weight difference between the best and the worst alleles; and p-values from permutation and negative control tests. TF: transcription factor; RSAT: Regulatory Sequence Analysis Tools; GV: genetic variant; PSSM: position weight matrix; TFBS: transc…

## Sheet: Supplementary Table S7
Supplementary Table S7. GVs state annotation.
GV	State
rs10796897	TssFlnkD,EnhWk
rs10796899	TssFlnkD,TssFlnkU,EnhWk,TssA,TssFlnk
rs218985	EnhA1,EnhWk,TxWk,EnhA2
rs10908329	TssFlnkD,EnhWk
1:8443319:C:A	TxWk
rs11121205	TssFlnkU,EnhA1
rs11121212	EnhA1,EnhA2,TxWk,EnhWk
rs10913131	TxWk,EnhWk
rs10913133	TxWk,EnhA2
rs12033847	TxWk,EnhWk
rs6673760	TxWk,EnhA1,EnhG1
rs7514517	TxWk,EnhA1,EnhG1,ZNF/Rpts
rs17641524	EnhWk,EnhA1,TxWk
rs10908335	TssA,TxWk
rs12025331	EnhWk,TxWk,TssFlnkD
rs905108	TssFlnkD,EnhWk
rs1890946	EnhWk,TssFlnk,TssFlnkD
rs2077725	TxWk
rs6588415	TxWk,EnhWk
rs736756	TssFlnk,TssA
rs3101339	TssFlnk,TssA
rs3101341	TssA
rs11210118	EnhWk,TxWk,TssFlnkD
rs12136559	EnhWk,EnhA1
rs1549556	TssA
rs200417151	EnhA2,EnhWk,EnhA1
rs78805055	EnhA2,EnhWk,EnhA1
rs12123169	EnhA1,TxWk
rs16851143	TxWk,EnhWk,Tx,EnhA1
rs10442601	TxWk
rs10218714	TxWk,EnhWk
rs199923	TxWk
rs11570190	EnhG1,TssA,TxWk,TssFlnkD,TssFlnkU,EnhA2
rs11605731	TxWk,TssA,TssFlnkU,TssFlnkD
rs12146541	TssA,TssFlnkU,TssFlnk,TssFlnkD
rs10896010	TxWk,Tx,TssFlnkU,EnhA1
rs11607833	TssFlnkD,EnhA2,TssFlnk,TssA,TxWk,EnhWk
rs4753210	TxWk,Tx
rs10750025	TxWk,EnhWk
rs17455520	TxWk,TssA,EnhWk,TssFlnkD,TssFlnkU
rs2081361	TxWk
rs499188	TssFlnkU,TxWk,EnhA1,TssFlnkD,EnhWk
rs731384	EnhA2,TxWk,EnhWk,EnhA1
rs10896006	TxWk,Tx,EnhA2
rs34582634	TxWk,EnhA2,EnhA1,Tx
rs11227199	TxWk,EnhA1,Tx,EnhA2,EnhWk
rs11227202	TxWk,Tx,EnhA2
rs11227205	TxWk,Tx,EnhA1,TssFlnkU
rs11227217	TxWk,Tx,TssFlnkU,EnhA2
rs897605	TssFlnk,EnhWk,TssA
rs115065992	TxWk,Tx,EnhA2,EnhA1
rs12364730	TxWk
rs12808303	TxWk,Tx
rs1346	Tx,TxWk,TssA,TssFlnkU
rs17146964	TxWk,Tx,TssFlnkU,EnhA2,EnhA1
rs3200401	TxWk,TssA,EnhG2
rs34527830	TxWk,Tx,EnhA2
11:70682163:C:G	TxWk,EnhA2,EnhG1
rs35826299	TxWk,Tx,EnhA2
rs7128776	TxWk,Tx
rs7935551	TxWk
rs11602121	TssFlnkD,EnhA2,TxWk
rs7948028	TxWk,EnhWk
rs4482060	EnhWk,EnhA1,TxWk
rs1151849	TssFlnkD,TxWk,TssFlnkU,EnhWk
rs7966446	TssA,TxWk,EnhWk,TssFlnkD
rs661647	EnhA1,TxWk,EnhWk
rs12579014	EnhG1,TxWk,Tx,EnhWk
rs11065293	EnhWk,TxWk,EnhA2
rs11065307	EnhWk,TxWk
rs1718188	EnhA2,TxWk,EnhWk,TssFlnkD
rs2062507	TxWk,EnhA1,EnhWk
rs3883901	TxWk,EnhA2,EnhWk,EnhA1
rs58918988	TxWk,Tx,EnhWk
rs9554474	TxWk,EnhWk
rs4771307	TxWk,EnhA2
rs4772097	EnhWk,EnhA1,TxWk,TssFlnk
rs1107379	TxWk,EnhWk
rs9556962	EnhWk,TxWk
rs9556963	EnhWk,TxWk
rs912330	TxWk,EnhA1
rs9556972	EnhWk
rs9556969	TssFlnkD,EnhA1,EnhWk,TssFlnkU
rs1111177	TssFlnk,TssA
rs12434356	TxWk,EnhA1,Tx
rs2230237	Tx,EnhG1
rs2302832	Tx,TxWk,EnhA1
rs4903267	Tx,EnhG1
rs8014289	TxWk
rs1152601	TxWk,TssFlnkD,EnhA2,EnhWk
rs1255992	EnhA1,EnhA2,TxWk
rs79196770	TxWk,EnhWk,EnhA2
rs55825782	EnhA2,TxWk
rs1152594	TxWk,Tx
rs215897	TxWk
rs3091404	Tx,EnhA2,TxWk,EnhWk
rs35029919	TxWk,EnhA2,Tx
rs7184673	TxWk,Tx
rs35951344	TxWk,Tx,EnhA2
rs1317727	TxWk,Tx
rs34367582	TxWk,EnhA2,Tx
rs12969480	TssFlnk,TssA,TxWk
rs12958048	EnhA2,TxWk
rs9320010	EnhA2,TxWk,EnhA1
rs9950000	EnhA1,TxWk,EnhA2
rs11682175	ZNF/Rpts,TssFlnk,TssFlnkD,TssA
rs2717000	ZNF/Rpts,EnhA2,TssFlnk,TssFlnkD,TssA
rs1990777	TxWk
rs55772859	EnhA1,TxWk,EnhWk
rs60818447	EnhWk,TxWk,EnhA2
rs62188630	EnhA2,EnhA1,EnhWk
rs6435364	EnhA1,TxWk,EnhG1
rs111934043	TxWk,Tx,EnhA2
rs111934601	Tx,TxWk
rs34273582	EnhA1,TxWk,Tx,TssFlnkU
rs34859415	EnhA1,TxWk,EnhWk,TssFlnkU,Tx
rs57772411	TxWk,Tx
rs6072299	EnhA1,Tx,TxWk,EnhG2
rs6072350	TxWk,Tx
rs61739307	EnhWk,Tx,TxWk
rs73261805	EnhG1,TxWk,Tx
rs7351166	Tx,TxWk
rs12624433	TxWk,Tx
rs4822020	TxWk,EnhA2
rs71327107	TssFlnk,TssA,TssFlnkU
rs9611460	TssFlnk,TssA,TssFlnkU
rs12715403	TxWk,EnhA1,Tx,EnhWk
rs1920015	TxWk,EnhWk,EnhA1
rs4498080	TxWk
rs7625504	TxWk,EnhA1,EnhG1,EnhWk
rs9846407	TxWk,Tx
rs1982861	TssFlnkU,TssA
rs4955440	TxWk,EnhWk,EnhA2
rs62259947	TxWk
rs6446268	TxWk
rs6774724	EnhA2,TxWk
rs7617480	EnhA1,TssFlnkU,EnhWk
rs7638750	EnhG1,Tx,TxWk
rs7644148	TxWk
rs7647973	TxWk
rs9817807	TxWk
rs9860055	TssFlnkU,TssA
rs116532413	TxWk
rs1193537	EnhA1,TxWk,EnhWk,EnhA2
rs13086348	TxWk
rs139347686	TssFlnkU,EnhA2,TxWk,EnhA1
rs144943143	TssFlnkU,EnhA2,TxWk,EnhA1
rs150045021	TssFlnkU,EnhA2,TxWk,EnhA1
rs4558712	TxWk
rs62635973	TssFlnkU,EnhA2,TxWk,EnhA1
rs699919	EnhA2,TxWk,EnhA1
rs73170315	TxWk,Tx
rs827808	TssFlnkU,EnhA2,TxWk,EnhA1
rs865454	TxWk
rs9784311	TxWk
rs9838196	TxWk,EnhWk
rs9860241	TxWk,Tx,ZNF/Rpts
rs110501	Tx
rs111065364	Tx
rs2237007	Tx,EnhG1
rs363092	EnhA2,TxWk,EnhWk,EnhA1
rs363096	Tx,TxWk
rs79021362	Tx,TxWk
rs10050495	TxWk,TssA
rs10069830	TxWk,TssA
rs10645782	TxWk,EnhWk
rs12696989	TxWk,EnhWk
rs12696990	TxWk
rs28524171	TxWk,TssA,TssFlnk
rs3822485	TxWk,EnhWk
rs3872822	TxWk,TssA
rs4700487	TxWk
rs247910	Tx
rs11135348	Tx,TssA,TxWk,TssFlnkD,TssFlnkU
rs1363118	TxWk,EnhA2,EnhG1,Tx
rs7727218	Tx,TssFlnk,TxWk,TssA
rs200482	TxWk,EnhG1,EnhWk
rs200490	Tx,TxWk
rs200493	Tx,TxWk
rs200496	Tx,TxWk
rs200950	EnhG1,TxWk,TssFlnkU,EnhG2,Tx,EnhWk,EnhA1
rs200966	Tx,TssFlnk,TxWk,TssA,TssFlnkU,TssFlnkD
rs200983	EnhG1,TxWk,EnhG2,Tx,EnhWk
rs370155	TxWk,EnhG1,TssA,TssFlnk,EnhWk
rs390764	TxWk,EnhG1,TssA,TssFlnk,EnhWk
rs493161	Tx,TxWk,EnhG1
rs58726701	Tx,TxWk
rs113917824	EnhG1,TxWk,Tx
rs11763750	TxWk,EnhG1
rs11772463	TxWk,Tx,EnhWk
rs11772627	TxWk,Tx,EnhA1,EnhWk
rs1403175	EnhG1,TxWk,EnhG2
rs1533827	TxWk,Tx
rs28728306	EnhG1,TxWk,EnhG2
rs55810445	Tx,EnhA2,EnhG1,TxWk
rs55988458	Tx,EnhWk,EnhA1,EnhA2
rs62436669	TssFlnk,TxWk,Tx
rs62442913	EnhG1,TxWk,Tx,EnhA1
rs62444919	TxWk,EnhA1,EnhWk,Tx
rs78443464	EnhG1,TxWk,Tx
rs10234805	TxWk,EnhWk
rs10278257	TxWk,EnhWk
rs1468803	TxWk
rs28549831	TxWk
rs3807866	TssA,TxWk
rs4721061	TxWk
rs7809700	TxWk
rs59400883	Tx,TxWk,EnhA1
rs3094466	TxWk
rs3094467	TxWk
rs17364281	EnhA1,EnhWk,EnhA2
rs58683261	EnhWk,EnhA1,EnhA2
rs7809993	TxWk,TssA
rs10087071	TxWk
rs12677582	TxWk,Tx
rs61146973	TxWk,EnhA2
rs7841297	TxWk
rs10759882	TxWk
rs6478629	TxWk
rs4128552	TxWk
rs4128551	TxWk
rs12139217	TxWk
rs3750683	TxWk,TssA,TssFlnk
rs1950834	TssA,TssFlnkU,TssFlnk
rs1950835	TssFlnkU,TssFlnkD,TssA
rs1950836	TssFlnkU,TssFlnkD,TssA
rs61990288	TssA,TssFlnkU
rs4799936	TssFlnk,TxWk
rs73182462	TxWk,EnhA2,EnhWk
rs12528131	TssFlnk
rs11763813	TxWk
rs62551585	TxWk
rs3793577	TxWk,EnhA2
rs11789302	TxWk,ZNF/Rpts
rs1752164	TxWk
rs1752169	TxWk
rs543070	TxWk,EnhWk
rs625271	TxWk
rs6657881	EnhWk
rs6657885	EnhWk
rs7969196	TxWk,EnhWk
rs1256065	EnhA1,TxWk
rs1256113	EnhWk
rs944047	EnhWk,TxWk
rs6493275	EnhA1,EnhWk
rs8040226	EnhWk
rs6493274	EnhA1,EnhWk
rs12606230	EnhA2
rs12956208	TxWk,EnhA1
rs12970424	TxWk,EnhA1
rs2311117	TxWk,EnhWk
rs62259933	EnhWk,TxWk
5:93745680:T:A	TssA
rs13201267	TxWk
rs240784	TxWk
rs34716527	TxWk
rs62422111	TxWk
rs725085	EnhA1
rs7544052	TxWk
rs4903266	TxWk
rs75581564	TxWk
rs494632	TxWk
rs1550343	TxWk
rs9839082	EnhWk
rs314276	ZNF/Rpts
rs314283	ZNF/Rpts
rs12709690	TxWk
rs6002277	TxWk
rs1990620	TxWk
rs1990622	TxWk
State annotation of GVs altering the TFBS according to ChromHMM. GV: genetic variant; TFBS: transcription factor binding site.
